# Supplementary material for: Topical phage therapy in a mouse model of Cutibacterium acnes-induced acne-like lesions
Source: PubMed Central journal article supplement (PMC9947178; doi:10.1038/s41467-023-36694-8), 2023-02-22
Supplement: 41467_2023_36694_MOESM1_ESM.pdf [file 41467_2023_36694_MOESM1_ESM.pdf]

Supplementary Information

**Topical phage therapy in a mouse model of *Cutibacterium acnes*-induced acne-like lesions**

Rimon *et al.*

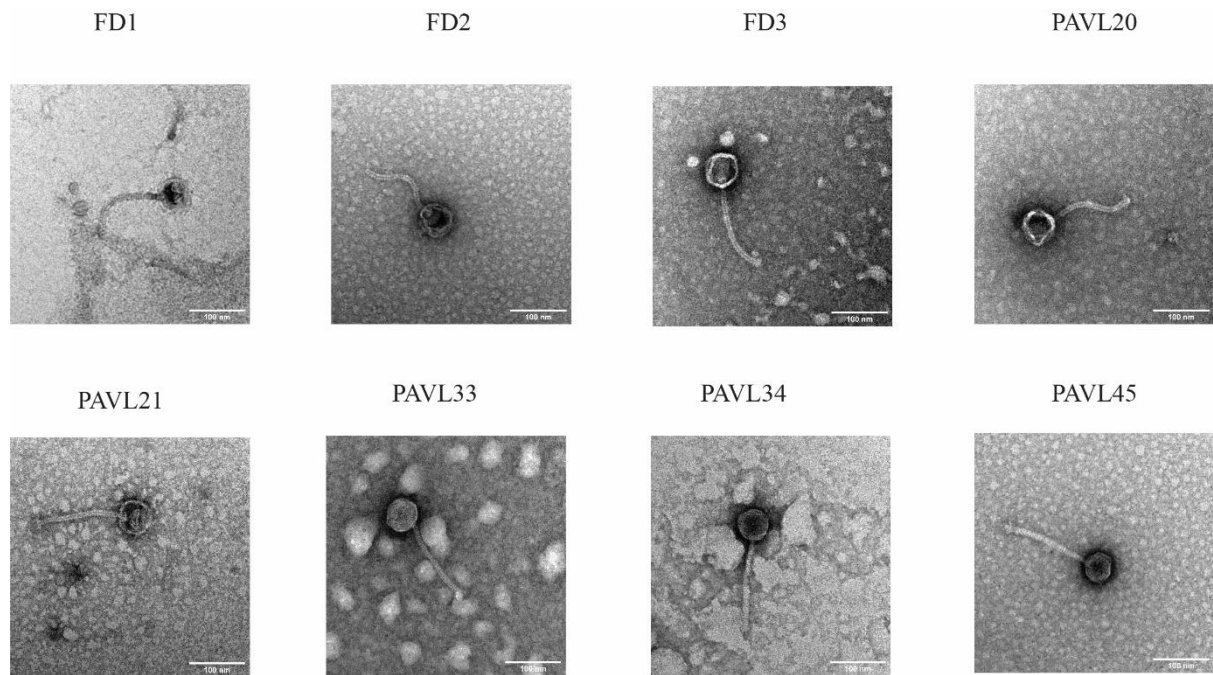

**Fig. S1.** Transmission electron microscopy (TEM) at  $\times 40,000$  magnification of the phages isolated in this work. Tail length and capsid diameter measurements are presented in Table 2. This experiment was done twice.

**Fig. S2.**

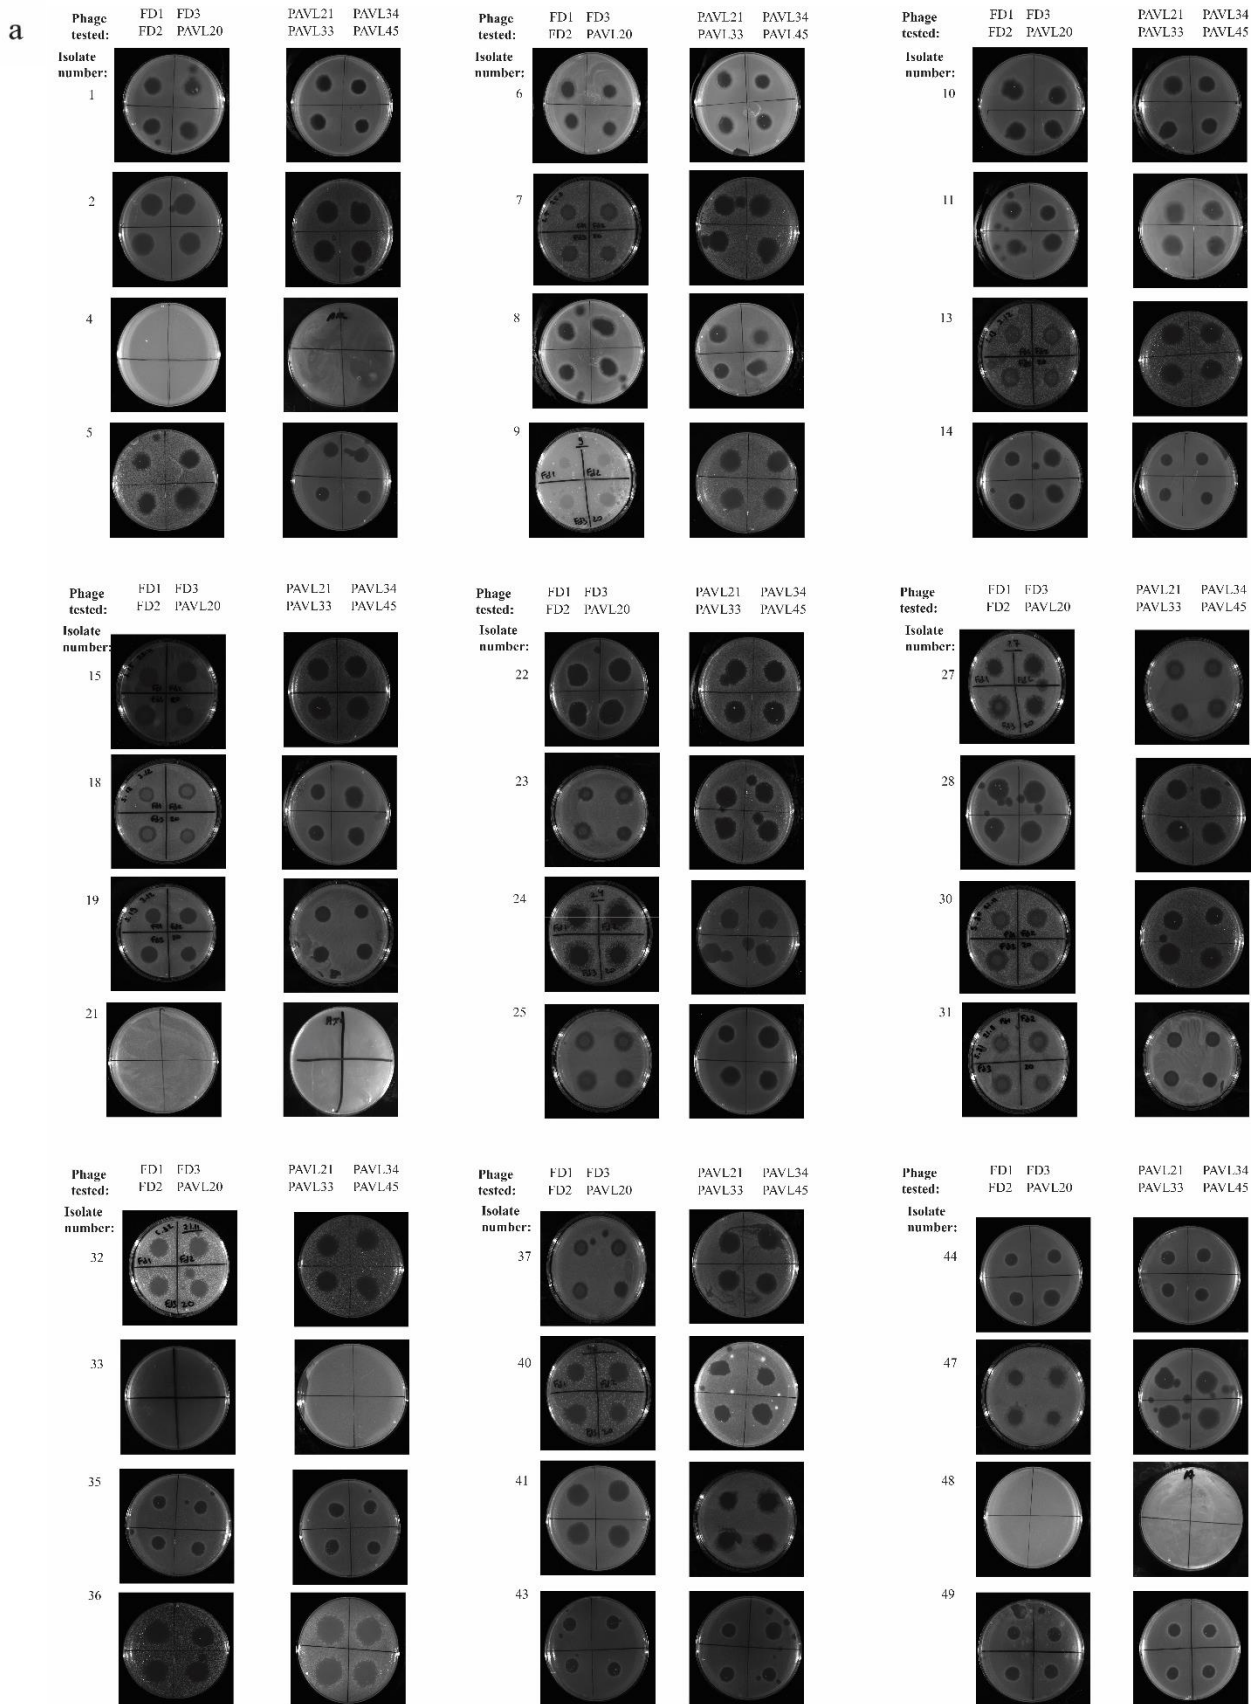

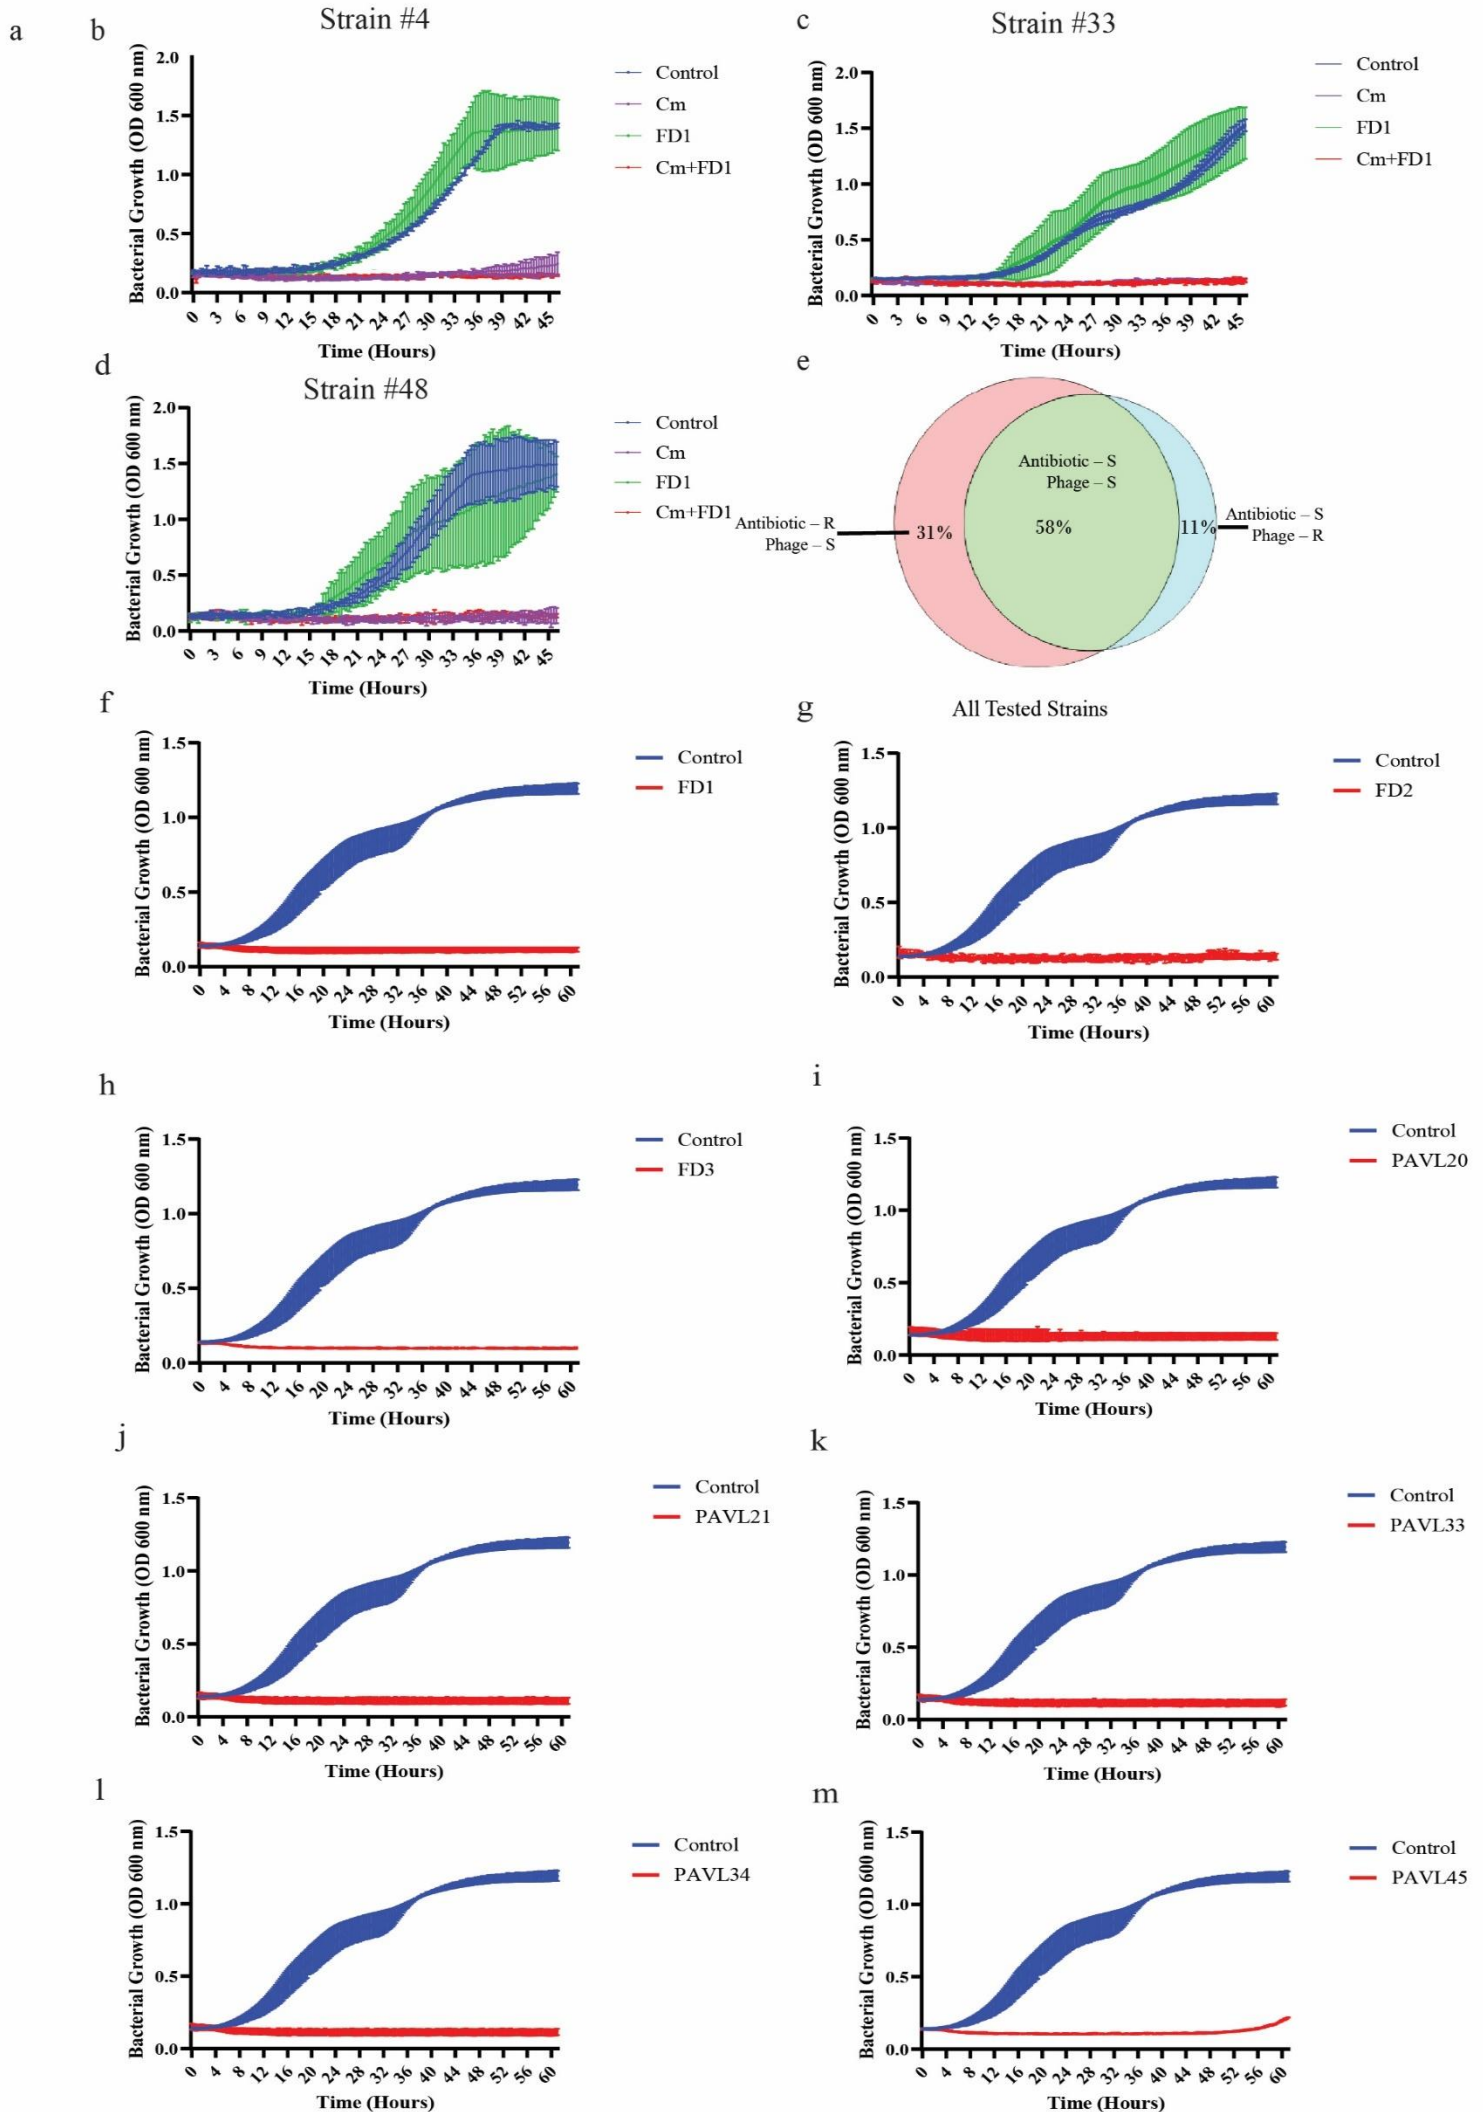

**Fig S2. Determination of phage sensitivity.** (a) The eight phages were spotted on lawns of 36 *C. acnes* isolates (4 phages per plate). (b-d) Kinetics of the phage-resistant strains in the presence of a representative phage (FD1) and antibiotic (Clindamycin, CM) and their combination. (e) Venn diagram of the phage and antibiotic susceptibility. S – susceptible, R – resistant. Note that no strain was resistant to both antibiotics and phages. (F-M) Kinetics of each of the phages grown with a selected sensitive *C. acnes* strain (#27) the strain that was used for the animal experiments. The results are the average of triplicates, presented as mean  $\pm$  SD. This experiment was done twice. Source data are provided as a Source Data file.

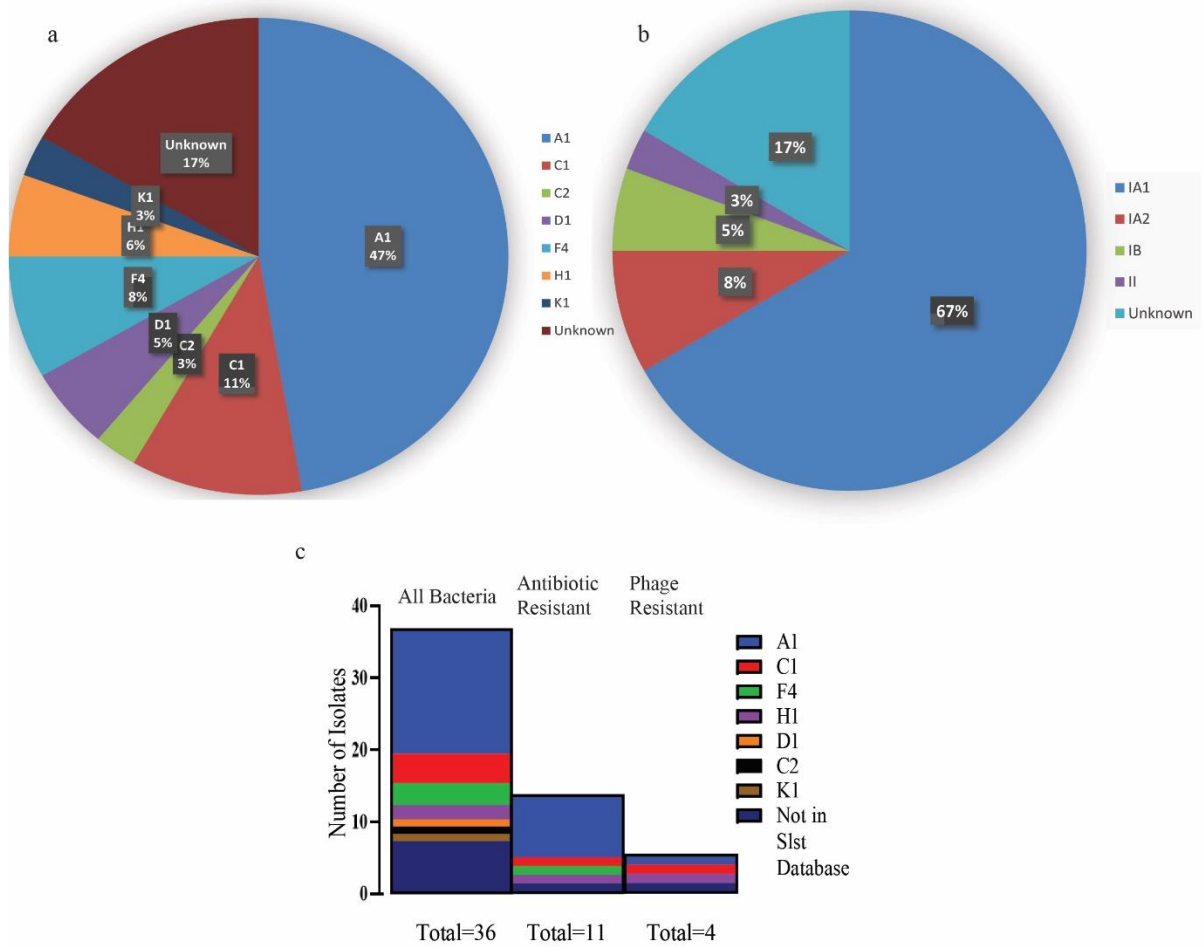

**Fig. S3. *C. acnes* Typing.** Distribution of the 36 clinical *C. acnes* isolates by (a) SLST types and (b) Phylotypes (traditional typing). (c) SLST type distribution by antibiotic and phage resistance phenotype. data are provided in Supplementary Table S3.

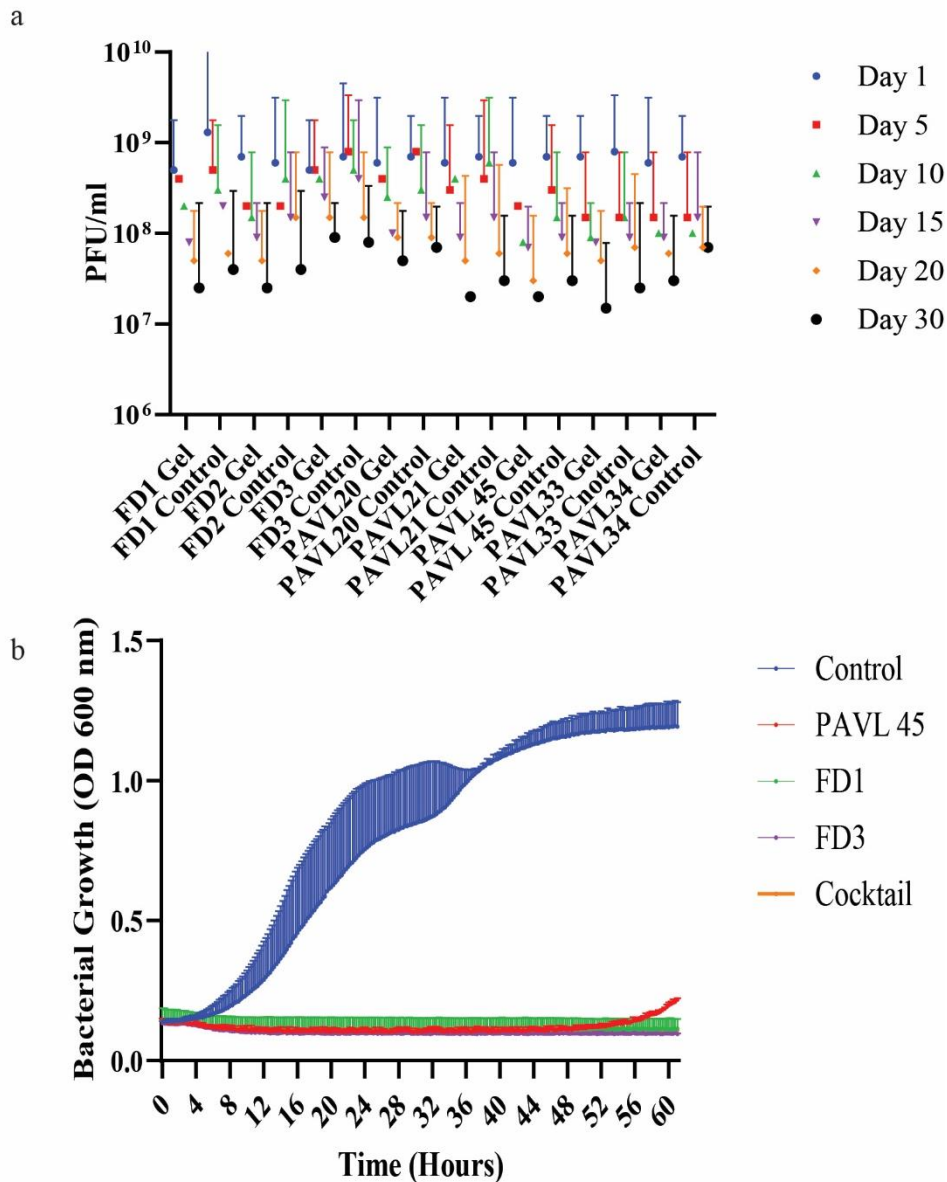

**Fig. S4. Phage selection for *in-vivo* experiments** phage stability and efficacy were assessed to select one phage, or a phage cocktail for *in-vivo* *Cutibacterium acnes*-induced acne-like lesions model. (a) Stability in the gel. The eight phages' activity was assessed following incubation in Carbopol gel for 30 days, with samples taken on days 1, 5, 10, 15, 20, and 30. Each day, PFU was calculated from a gel tube and a matching control tube containing a phage in Wilkins medium. (b) Comparison of a single phage activity using FD1, FD3, and PAVL45 vs. a cocktail containing all three phages on *C. acnes* strain #27. Based on these experiments, FD3 was selected as a single phage for the *in-vivo* experiments. Data are presented as mean  $\pm$  standard deviation (SD). This experiment was done twice. Source data are provided as a Source Data file.

**Fig. S5**

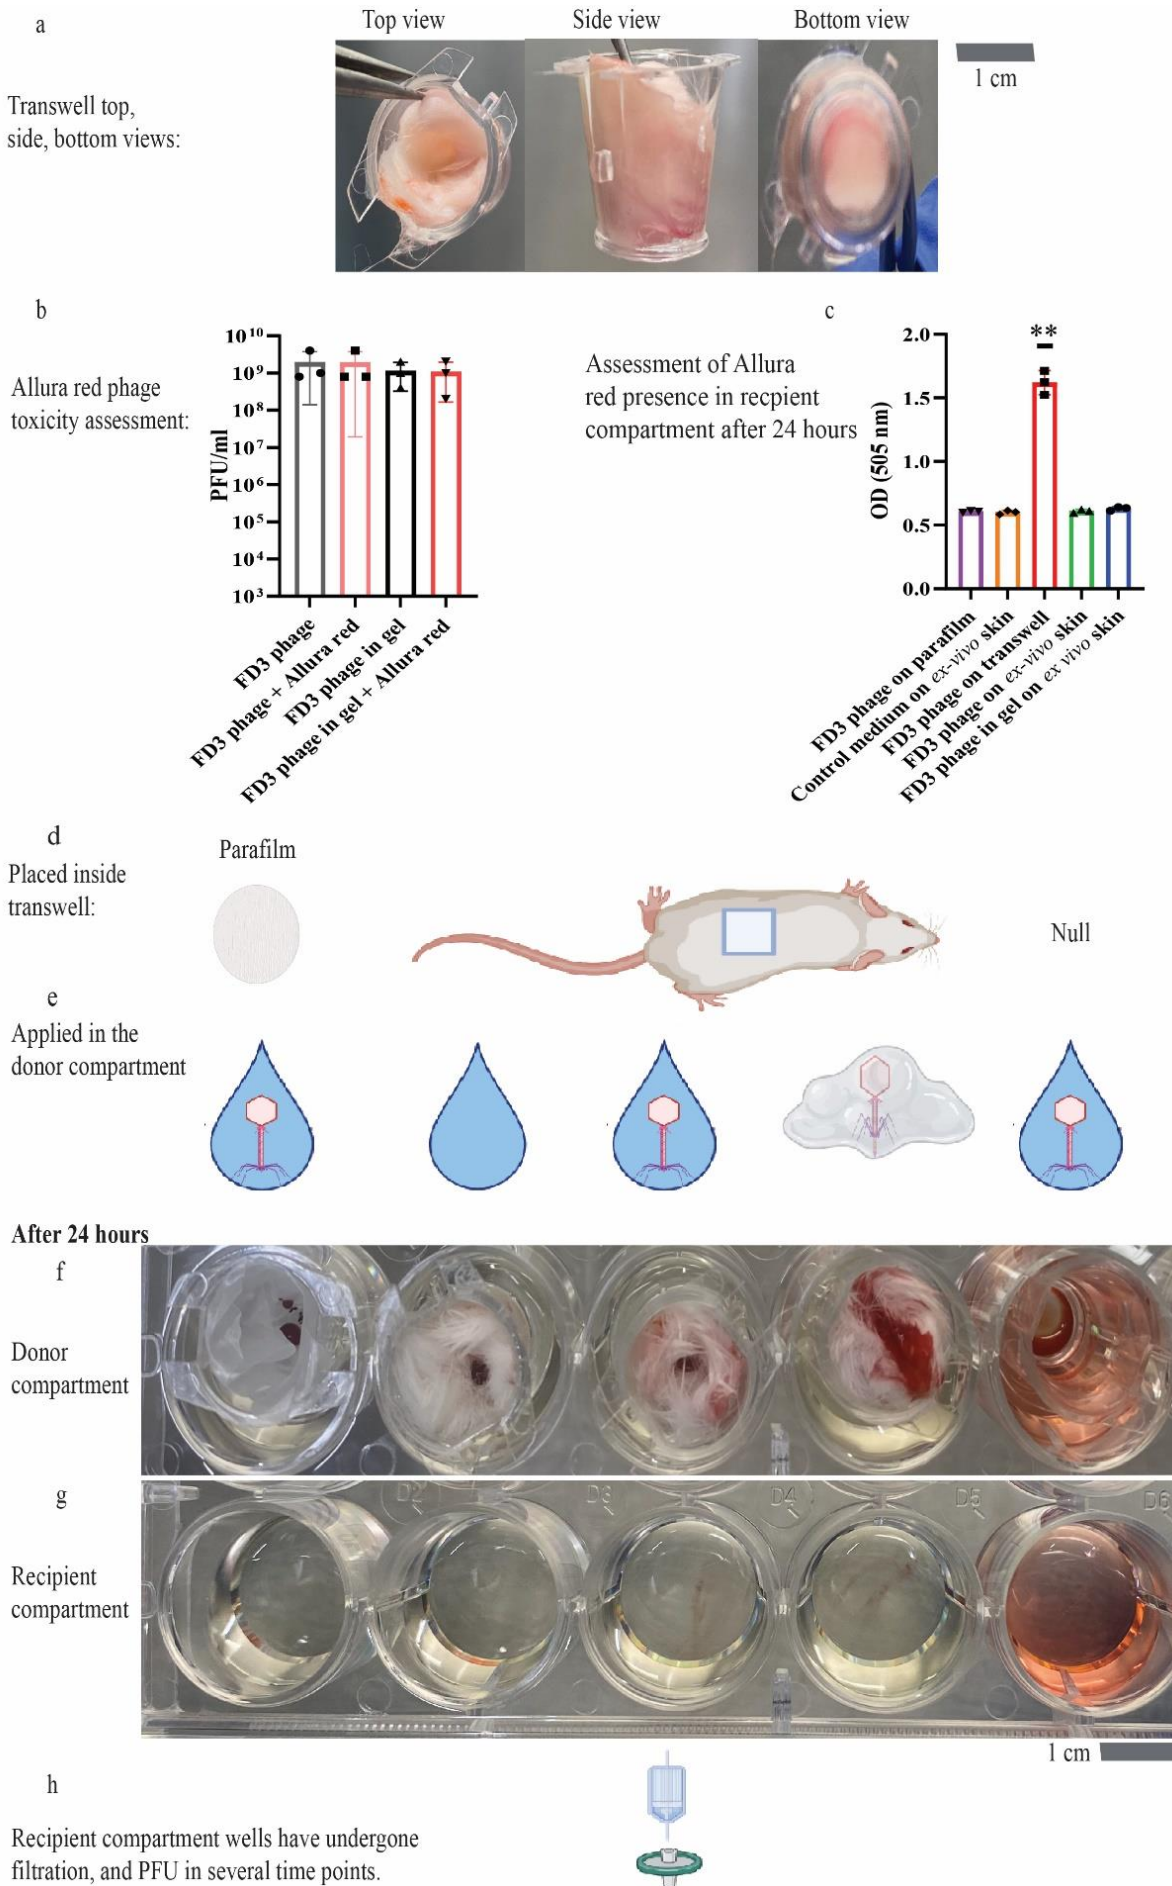



i

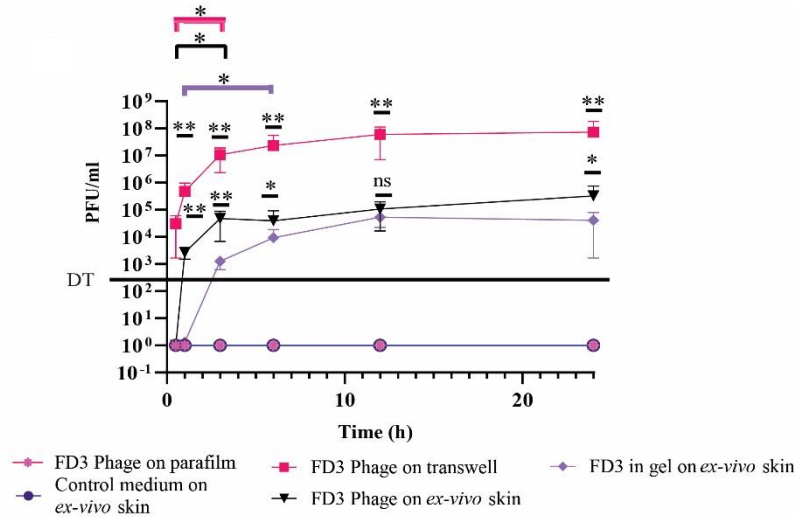

**Fig. S5. Assessment of FD3 phages’ ability to penetrate intact skin of mice.** Phage penetration assessment was done based on the previously described transwell system a version of Franz Diffusion Cell method<sup>1</sup> (a) Healthy full-thickness skin fragments were harvested from mice and put inside 0.4µm transwells. (b) FD3 phage in Wilkins medium, FD3 phage in Carbapol gel, or control Wilkins medium were all supplied with 15 mg/ml Allura Red dye and toxicity was evaluated by comparing PFU counts after 24 hours. *p*-value of FD3 phage in comparison FD3 phage + Allura red = 0.96, and *p*-value of FD3 phage in gel in comparison FD3 phage in gel + Allura red = 0.92 (c) After 24 hours, optical density (OD) from the medium of the recipient compartment was measured. *p*-value of FD3 phage on transwell is < 0.001 in comparison to all other groups. (d) Parafilm/null were put in the control wells. (e-f) 10µl of phage, control or gel were applied in the center of the donor compartment. (g-i) The liquid medium from the recipient compartment was filtered through a 0.22 µm filter, and PFU was assessed at several time points (0.5, 1, 3, 6, 12, and 24 hours). The curves of “FD3 Phage on parafilm” and “Control medium on *ex-vivo* skin” overlap. The results are the average of triplicates, presented as mean ± SD. Student's t-test two-tailed unpaired was used DT stands for Detection Threshold. After 24 hours, *p*-value of FD3 phage on *ex vivo* skin was <0.001 in comparison to phage on either parafilm or transwell, and = 0.004 in comparison to FD3 phage on *ex vivo* skin. \* denotes *p*-value< 0.05, and \*\* denotes *p*-value< 0.001. This experiment was done twice. Source data are provided as a Source Data file. (This figure was prepared using biorender.com)

| Characteristic                              | Value                     | Score (AU) | Example                                                                               |
|---------------------------------------------|---------------------------|------------|---------------------------------------------------------------------------------------|
| Diameter                                    | 0-1.9 mm                  | 0          |                                                                                       |
|                                             | 2-3.9 mm                  | 1          |                                                                                       |
|                                             | 4-5.9 mm                  | 2          |                                                                                       |
|                                             | 6-8 mm = 3                | 3          |                                                                                       |
| Elevation (Double Blinded)                  | Flat                      | 0          |    |
|                                             | Small                     | 1          |    |
|                                             | Large                     | 2          |    |
| Eschar (Double Blinded)                     | No                        | 0          |   |
|                                             | Mild                      | 1          |  |
|                                             | Marked                    | 2          |  |
| Histology (Based on pathologists' analysis) | Within Normal Range       | 0          | See Supplemental Fig. S7                                                              |
|                                             | Mild                      | 1          |                                                                                       |
|                                             | Moderate                  | 2          |                                                                                       |
|                                             | Severe (Central Necrosis) | 3          |                                                                                       |

**Fig. S6. The clinical scoring of mice that was used in this work.** Diameter, elevation, and eschar were used to score lesion's severity. The total clinical score of the lesions was calculated by summing up the clinical parameters on a scale between 0-7 (7 most severe). The overall combined histological and clinical score was calculated as the sum of the average histological score (Supplemental Fig. S7) and the total clinical score. For more details, please refer to Fig. 3, Supplemental Table S4, and the phage clinical efficacy subsection assessment in the Materials and Methods.

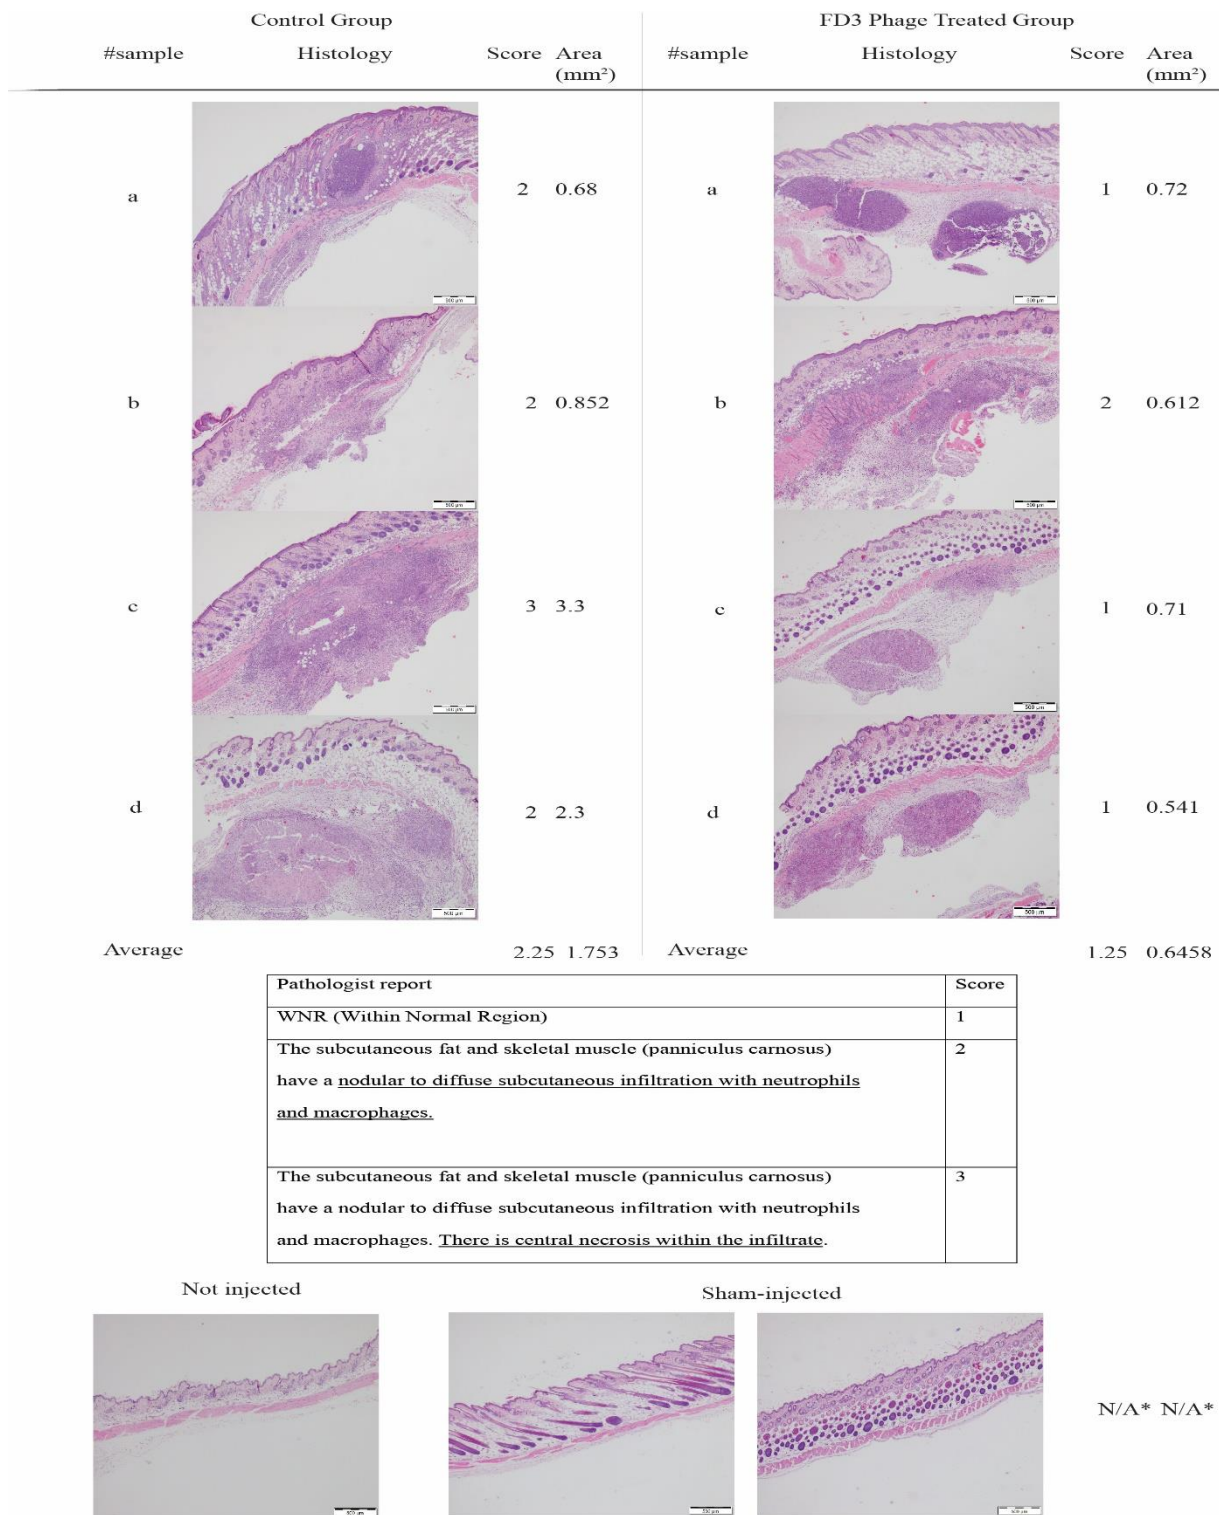

**Fig. S7. Histological score.** The score was created based on four biopsies from each group of mice in  $\times 4$  magnification. The area was calculated graphically using ImageJ software (1.53), and a score was calculated based on the pathological report. Averaging and combining the histological and clinical scores resulted in the combined histological and clinical score (See also Fig. 4). \*Not-infected and sham-injected controls were not scored as no lesion was detected. This experiment was done twice.

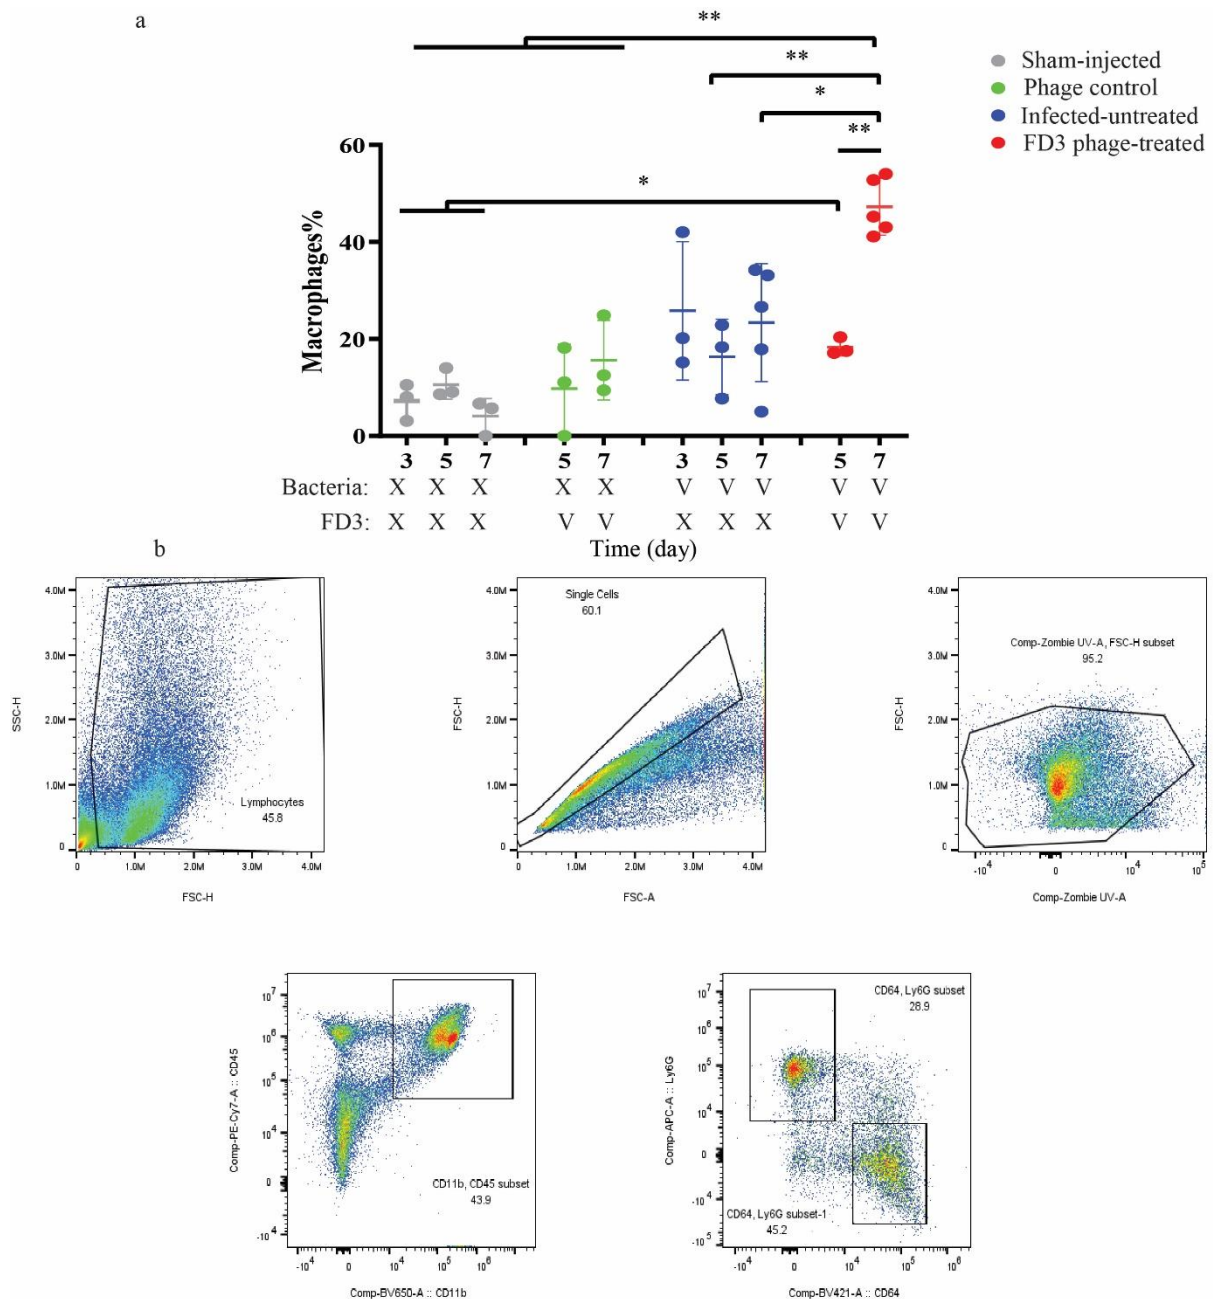

**Fig. S8. Flow cytometry of macrophages from the *C. acnes*-induced lesions at various time points.** (a) Percent of macrophages in mice lesions. On day 3, mice were allocated to treatment or vehicle groups, therefore there are no treated mice at this time point. The results are presented as mean  $\pm$  SD.  $p$ -value of the infected-untreated group in comparison to the phage treated group = 0.61, 0.01 on day 5, 7 accordingly.  $n$  = between 3-5 mice as described in Table 4. Student's t-test two-tailed unpaired was used, \* denotes  $p$ -value < 0.05, and \*\* denotes  $p$ -value < 0.001. Source data are provided as a Source Data file. (b) Gating strategy of  $CD45^+CD11b^+Ly6G^{+2}$  (neutrophils) and  $CD45^+CD11b^+CD64^{+3}$  (macrophages) and flow cytometry experiments.

**Table S1.**

The genome sequence details of the phages used to construct the phylogenetic tree which is depicted in Fig. 1a. This table was created using the Genius Prime 2022.2.1 package.

**Table S1.**

| Index | Accession | Description                                         | Sequence length | Taxonomy                                                                                                                               |
|-------|-----------|-----------------------------------------------------|-----------------|----------------------------------------------------------------------------------------------------------------------------------------|
| 1     | DQ431235  | Propionibacterium phage PA6, complete genome        | 29739           | Viruses; Duplodnaviria; Heunggongvirae; Uroviricota; Caudoviricetes; Caudovirales; Siphoviridae; Pahexavirus                           |
| 2     | FJ706171  | Propionibacterium phage PAD20, complete genome      | 29074           | Viruses; Duplodnaviria; Heunggongvirae; Uroviricota; Caudoviricetes; Caudovirales; Siphoviridae; Pahexavirus                           |
| 3     | FJ706172  | Propionibacterium phage PAS50, complete genome      | 29017           | Viruses; Duplodnaviria; Heunggongvirae; Uroviricota; Caudoviricetes; Caudovirales; Siphoviridae; Pahexavirus                           |
| 4     | JX262215  | Propionibacterium phage P9.1, complete genome       | 29214           | Viruses; Duplodnaviria; Heunggongvirae; Uroviricota; Caudoviricetes; Caudovirales; Siphoviridae; Pahexavirus                           |
| 5     | JX262216  | Propionibacterium phage P14.4, complete genome      | 29729           | Viruses; Duplodnaviria; Heunggongvirae; Uroviricota; Caudoviricetes; Caudovirales; Siphoviridae; Pahexavirus                           |
| 6     | JX262217  | Propionibacterium phage P101A, complete genome      | 29574           | Viruses; Duplodnaviria; Heunggongvirae; Uroviricota; Caudoviricetes; Caudovirales; Siphoviridae; Pahexavirus                           |
| 7     | JX262218  | Propionibacterium phage P104A, complete genome      | 29371           | Viruses; Duplodnaviria; Heunggongvirae; Uroviricota; Caudoviricetes; Caudovirales; Siphoviridae; Pahexavirus                           |
| 8     | JX262219  | Propionibacterium phage P105, complete genome       | 29202           | Viruses; Duplodnaviria; Heunggongvirae; Uroviricota; Caudoviricetes; Caudovirales; Siphoviridae; Pahexavirus                           |
| 9     | JX262220  | Propionibacterium phage P100D, complete genome      | 29506           | Viruses; Duplodnaviria; Heunggongvirae; Uroviricota; Caudoviricetes; Caudovirales; Siphoviridae; Pahexavirus                           |
| 10    | JX262221  | Propionibacterium phage P100_A, complete genome     | 29505           | Viruses; Duplodnaviria; Heunggongvirae; Uroviricota; Caudoviricetes; Caudovirales; Siphoviridae; Pahexavirus                           |
| 11    | JX262222  | Propionibacterium phage P100_1, complete genome     | 29612           | Viruses; Duplodnaviria; Heunggongvirae; Uroviricota; Caudoviricetes; Caudovirales; Siphoviridae; Pahexavirus                           |
| 12    | JX262223  | Propionibacterium phage P1.1, complete genome       | 29348           | Viruses; Duplodnaviria; Heunggongvirae; Uroviricota; Caudoviricetes; Caudovirales; Siphoviridae; Pahexavirus                           |
| 13    | JX262224  | Propionibacterium phage ATCC29399B_T, complete geno | 29516           | Viruses; Duplodnaviria; Heunggongvirae; Uroviricota; Caudoviricetes; Caudovirales; Siphoviridae; Pahexavirus                           |
| 14    | JX262225  | Propionibacterium phage ATCC29399B_C, complete geno | 29516           | Viruses; Duplodnaviria; Heunggongvirae; Uroviricota; Caudoviricetes; Caudovirales; Siphoviridae; Pahexavirus                           |
| 15    | JX570702  | Propionibacterium phage PHL111M01, complete genome  | 29140           | Viruses; Duplodnaviria; Heunggongvirae; Uroviricota; Caudoviricetes; Caudovirales; Siphoviridae; Pahexavirus                           |
| 16    | JX570703  | Propionibacterium phage PHL073M02, complete genome  | 29503           | Viruses; Duplodnaviria; Heunggongvirae; Uroviricota; Caudoviricetes; Caudovirales; Siphoviridae; Pahexavirus; unclassified Pahexavirus |
| 17    | JX570704  | Propionibacterium phage PHL010M04, complete genome  | 29511           | Viruses; Duplodnaviria; Heunggongvirae; Uroviricota; Caudoviricetes; Caudovirales; Siphoviridae; Pahexavirus; unclassified Pahexavirus |
| 18    | JX570705  | Propionibacterium phage PHL060L00, complete genome  | 29514           | Viruses; Duplodnaviria; Heunggongvirae; Uroviricota; Caudoviricetes; Caudovirales; Siphoviridae; Pahexavirus                           |
| 19    | JX570706  | Propionibacterium phage PHL037M02, complete genome  | 29443           | Viruses; Duplodnaviria; Heunggongvirae; Uroviricota; Caudoviricetes; Caudovirales; Siphoviridae; Pahexavirus                           |

|    |          |                                                    |       |                                                                                                                                        |
|----|----------|----------------------------------------------------|-------|----------------------------------------------------------------------------------------------------------------------------------------|
| 20 | JX570707 | Propionibacterium phage PHL085M01, complete genome | 29451 | Viruses; Duplodnaviria; Heunggongvirae; Uroviricota; Caudoviricetes; Caudovirales; Siphoviridae; Pahexavirus; unclassified Pahexavirus |
| 21 | JX570708 | Propionibacterium phage PHL115M02, complete genome | 29453 | Viruses; Duplodnaviria; Heunggongvirae; Uroviricota; Caudoviricetes; Caudovirales; Siphoviridae; Pahexavirus; unclassified Pahexavirus |
| 22 | JX570709 | Propionibacterium phage PHL067M10, complete genome | 29377 | Viruses; Duplodnaviria; Heunggongvirae; Uroviricota; Caudoviricetes; Caudovirales; Siphoviridae; Pahexavirus; unclassified Pahexavirus |
| 23 | JX570710 | Propionibacterium phage PHL071N05, complete genome | 29467 | Viruses; Duplodnaviria; Heunggongvirae; Uroviricota; Caudoviricetes; Caudovirales; Siphoviridae; Pahexavirus                           |
| 24 | JX570711 | Propionibacterium phage PHL066M04, complete genome | 29512 | Viruses; Duplodnaviria; Heunggongvirae; Uroviricota; Caudoviricetes; Caudovirales; Siphoviridae; Pahexavirus; unclassified Pahexavirus |
| 25 | JX570712 | Propionibacterium phage PHL114L00, complete genome | 29464 | Viruses; Duplodnaviria; Heunggongvirae; Uroviricota; Caudoviricetes; Caudovirales; Siphoviridae; Pahexavirus                           |
| 26 | JX570713 | Propionibacterium phage PHL113M01, complete genome | 29200 | Viruses; Duplodnaviria; Heunggongvirae; Uroviricota; Caudoviricetes; Caudovirales; Siphoviridae; Pahexavirus                           |
| 27 | JX570714 | Propionibacterium phage PHL112N00, complete genome | 29266 | Viruses; Duplodnaviria; Heunggongvirae; Uroviricota; Caudoviricetes; Caudovirales; Siphoviridae; Pahexavirus                           |
| 28 | KJ578758 | Propionibacterium phage PHL009M11, complete genome | 29503 | Viruses; Duplodnaviria; Heunggongvirae; Uroviricota; Caudoviricetes; Caudovirales; Siphoviridae; Pahexavirus                           |
| 29 | KJ578759 | Propionibacterium phage PHL025M00, complete genome | 29496 | Viruses; Duplodnaviria; Heunggongvirae; Uroviricota; Caudoviricetes; Caudovirales; Siphoviridae; Pahexavirus                           |
| 30 | KJ578760 | Propionibacterium phage PHL030N00, complete genome | 29423 | Viruses; Duplodnaviria; Heunggongvirae; Uroviricota; Caudoviricetes; Caudovirales; Siphoviridae; Pahexavirus; unclassified Pahexavirus |
| 31 | KJ578761 | Propionibacterium phage PHL041M10, complete genome | 29412 | Viruses; Duplodnaviria; Heunggongvirae; Uroviricota; Caudoviricetes; Caudovirales; Siphoviridae; Pahexavirus                           |
| 32 | KJ578762 | Propionibacterium phage PHL055N00, complete genome | 29264 | Viruses; Duplodnaviria; Heunggongvirae; Uroviricota; Caudoviricetes; Caudovirales; Siphoviridae; Pahexavirus; unclassified Pahexavirus |
| 33 | KJ578763 | Propionibacterium phage PHL064M01, complete genome | 29424 | Viruses; Duplodnaviria; Heunggongvirae; Uroviricota; Caudoviricetes; Caudovirales; Siphoviridae; Pahexavirus; unclassified Pahexavirus |
| 34 | KJ578764 | Propionibacterium phage PHL064M02, complete genome | 29407 | Viruses; Duplodnaviria; Heunggongvirae; Uroviricota; Caudoviricetes; Caudovirales; Siphoviridae; Pahexavirus; unclassified Pahexavirus |
| 35 | KJ578765 | Propionibacterium phage PHL067M01, complete genome | 29377 | Viruses; Duplodnaviria; Heunggongvirae; Uroviricota; Caudoviricetes; Caudovirales; Siphoviridae; Pahexavirus                           |
| 36 | KJ578766 | Propionibacterium phage PHL067M09, complete genome | 29386 | Viruses; Duplodnaviria; Heunggongvirae; Uroviricota; Caudoviricetes; Caudovirales; Siphoviridae; Pahexavirus; unclassified Pahexavirus |
| 37 | KJ578767 | Propionibacterium phage PHL070N00, complete genome | 29421 | Viruses; Duplodnaviria; Heunggongvirae; Uroviricota; Caudoviricetes; Caudovirales; Siphoviridae; Pahexavirus                           |
| 38 | KJ578768 | Propionibacterium phage PHL082M00, complete genome | 29491 | Viruses; Duplodnaviria; Heunggongvirae; Uroviricota; Caudoviricetes; Caudovirales; Siphoviridae; Pahexavirus; unclassified Pahexavirus |
| 39 | KJ578769 | Propionibacterium phage PHL082M02, complete genome | 29491 | Viruses; Duplodnaviria; Heunggongvirae; Uroviricota; Caudoviricetes; Caudovirales; Siphoviridae; Pahexavirus; unclassified Pahexavirus |
| 40 | KJ578770 | Propionibacterium phage PHL082M03, complete genome | 29491 | Viruses; Duplodnaviria; Heunggongvirae; Uroviricota; Caudoviricetes; Caudovirales; Siphoviridae; Pahexavirus                           |
| 41 | KJ578771 | Propionibacterium phage PHL082M04, complete genome | 29491 | Viruses; Duplodnaviria; Heunggongvirae; Uroviricota; Caudoviricetes; Caudovirales; Siphoviridae; Pahexavirus; unclassified Pahexavirus |

|    |          |                                                       |       |                                                                                                                                        |
|----|----------|-------------------------------------------------------|-------|----------------------------------------------------------------------------------------------------------------------------------------|
| 42 | KJ578772 | Propionibacterium phage PHL085N00, complete genome    | 29454 | Viruses; Duplodnaviria; Heunggongvirae; Uroviricota; Caudoviricetes; Caudovirales; Siphoviridae; Pahexavirus; unclassified Pahexavirus |
| 43 | KJ578773 | Propionibacterium phage PHL092M00, complete genome    | 29261 | Viruses; Duplodnaviria; Heunggongvirae; Uroviricota; Caudoviricetes; Caudovirales; Siphoviridae; Pahexavirus                           |
| 44 | KJ578774 | Propionibacterium phage PHL095N00, complete genome    | 29751 | Viruses; Duplodnaviria; Heunggongvirae; Uroviricota; Caudoviricetes; Caudovirales; Siphoviridae; Pahexavirus                           |
| 45 | KJ578775 | Propionibacterium phage PHL114N00, complete genome    | 29464 | Viruses; Duplodnaviria; Heunggongvirae; Uroviricota; Caudoviricetes; Caudovirales; Siphoviridae; Pahexavirus                           |
| 46 | KJ578776 | Propionibacterium phage PHL116M00, complete genome    | 29394 | Viruses; Duplodnaviria; Heunggongvirae; Uroviricota; Caudoviricetes; Caudovirales; Siphoviridae; Pahexavirus                           |
| 47 | KJ578777 | Propionibacterium phage PHL116M10, complete genome    | 29396 | Viruses; Duplodnaviria; Heunggongvirae; Uroviricota; Caudoviricetes; Caudovirales; Siphoviridae; Pahexavirus; unclassified Pahexavirus |
| 48 | KJ578778 | Propionibacterium phage PHL117M00, complete genome    | 29255 | Viruses; Duplodnaviria; Heunggongvirae; Uroviricota; Caudoviricetes; Caudovirales; Siphoviridae; Pahexavirus                           |
| 49 | KJ578779 | Propionibacterium phage PHL117M01, complete genome    | 29422 | Viruses; Duplodnaviria; Heunggongvirae; Uroviricota; Caudoviricetes; Caudovirales; Siphoviridae; Pahexavirus                           |
| 50 | KJ578780 | Propionibacterium phage PHL132N00, complete genome    | 29003 | Viruses; Duplodnaviria; Heunggongvirae; Uroviricota; Caudoviricetes; Caudovirales; Siphoviridae; Pahexavirus                           |
| 51 | KJ578781 | Propionibacterium phage PHL141N00, complete genome    | 29494 | Viruses; Duplodnaviria; Heunggongvirae; Uroviricota; Caudoviricetes; Caudovirales; Siphoviridae; Pahexavirus                           |
| 52 | KJ578782 | Propionibacterium phage PHL150M00, complete genome    | 29438 | Viruses; Duplodnaviria; Heunggongvirae; Uroviricota; Caudoviricetes; Caudovirales; Siphoviridae; Pahexavirus; unclassified Pahexavirus |
| 53 | KJ578783 | Propionibacterium phage PHL151M00, complete genome    | 29511 | Viruses; Duplodnaviria; Heunggongvirae; Uroviricota; Caudoviricetes; Caudovirales; Siphoviridae; Pahexavirus                           |
| 54 | KJ578784 | Propionibacterium phage PHL151N00, complete genome    | 29511 | Viruses; Duplodnaviria; Heunggongvirae; Uroviricota; Caudoviricetes; Caudovirales; Siphoviridae; Pahexavirus                           |
| 55 | KJ578785 | Propionibacterium phage PHL152M00, complete genome    | 29247 | Viruses; Duplodnaviria; Heunggongvirae; Uroviricota; Caudoviricetes; Caudovirales; Siphoviridae; Pahexavirus                           |
| 56 | KJ578786 | Propionibacterium phage PHL163M00, complete genome    | 29264 | Viruses; Duplodnaviria; Heunggongvirae; Uroviricota; Caudoviricetes; Caudovirales; Siphoviridae; Pahexavirus                           |
| 57 | KJ578787 | Propionibacterium phage PHL171M01, complete genome    | 29327 | Viruses; Duplodnaviria; Heunggongvirae; Uroviricota; Caudoviricetes; Caudovirales; Siphoviridae; Pahexavirus                           |
| 58 | KJ578788 | Propionibacterium phage PHL179M00, complete genome    | 29428 | Viruses; Duplodnaviria; Heunggongvirae; Uroviricota; Caudoviricetes; Caudovirales; Siphoviridae; Pahexavirus                           |
| 59 | KJ578789 | Propionibacterium phage PHL194M00, complete genome    | 29264 | Viruses; Duplodnaviria; Heunggongvirae; Uroviricota; Caudoviricetes; Caudovirales; Siphoviridae; Pahexavirus                           |
| 60 | KJ578790 | Propionibacterium phage PHL199M00, complete genome    | 29806 | Viruses; Duplodnaviria; Heunggongvirae; Uroviricota; Caudoviricetes; Caudovirales; Siphoviridae; Pahexavirus                           |
| 61 | KJ578791 | Propionibacterium phage PHL301M00, complete genome    | 29323 | Viruses; Duplodnaviria; Heunggongvirae; Uroviricota; Caudoviricetes; Caudovirales; Siphoviridae; Pahexavirus                           |
| 62 | KJ578792 | Propionibacterium phage PHL308M00, complete genome    | 29442 | Viruses; Duplodnaviria; Heunggongvirae; Uroviricota; Caudoviricetes; Caudovirales; Siphoviridae; Pahexavirus                           |
| 63 | KJ722067 | Propionibacterium phage Pacnes 2012-15, complete geno | 29741 | Viruses; Duplodnaviria; Heunggongvirae; Uroviricota; Caudoviricetes; Caudovirales; Siphoviridae; Pahexavirus                           |

|    |          |                                                      |       |                                                                                                                                        |
|----|----------|------------------------------------------------------|-------|----------------------------------------------------------------------------------------------------------------------------------------|
| 64 | KR337643 | Propionibacterium phage MrAK, complete genome        | 29726 | Viruses; Duplodnaviria; Heunggongvirae; Uroviricota; Caudoviricetes; Caudovirales; Siphoviridae; Pahexavirus                           |
| 65 | KR337644 | Propionibacterium phage Procrass1, complete genome   | 29347 | Viruses; Duplodnaviria; Heunggongvirae; Uroviricota; Caudoviricetes; Caudovirales; Siphoviridae; Pahexavirus                           |
| 66 | KR337645 | Propionibacterium phage Kubed, complete genome       | 29461 | Viruses; Duplodnaviria; Heunggongvirae; Uroviricota; Caudoviricetes; Caudovirales; Siphoviridae; Pahexavirus                           |
| 67 | KR337646 | Propionibacterium phage Wizzo, complete genome       | 29463 | Viruses; Duplodnaviria; Heunggongvirae; Uroviricota; Caudoviricetes; Caudovirales; Siphoviridae; Pahexavirus                           |
| 68 | KR337647 | Propionibacterium phage Solid, complete genome       | 29440 | Viruses; Duplodnaviria; Heunggongvirae; Uroviricota; Caudoviricetes; Caudovirales; Siphoviridae; Pahexavirus                           |
| 69 | KR337648 | Propionibacterium phage SKKY, complete genome        | 29594 | Viruses; Duplodnaviria; Heunggongvirae; Uroviricota; Caudoviricetes; Caudovirales; Siphoviridae; Pahexavirus                           |
| 70 | KR337649 | Propionibacterium phage Keiki, complete genome       | 29339 | Viruses; Duplodnaviria; Heunggongvirae; Uroviricota; Caudoviricetes; Caudovirales; Siphoviridae; Pahexavirus                           |
| 71 | KR337650 | Propionibacterium phage Lauchelly, complete genome   | 29517 | Viruses; Duplodnaviria; Heunggongvirae; Uroviricota; Caudoviricetes; Caudovirales; Siphoviridae; Pahexavirus                           |
| 72 | KR337651 | Propionibacterium phage Attacne, complete genome     | 28876 | Viruses; Duplodnaviria; Heunggongvirae; Uroviricota; Caudoviricetes; Caudovirales; Siphoviridae; Pahexavirus                           |
| 73 | KR337652 | Propionibacterium phage Stormborn, complete genome   | 29330 | Viruses; Duplodnaviria; Heunggongvirae; Uroviricota; Caudoviricetes; Caudovirales; Siphoviridae; Pahexavirus                           |
| 74 | KR337653 | Propionibacterium phage Pirate, complete genome      | 29324 | Viruses; Duplodnaviria; Heunggongvirae; Uroviricota; Caudoviricetes; Caudovirales; Siphoviridae; Pahexavirus                           |
| 75 | KR337654 | Propionibacterium phage Ouroboros, complete genome   | 29506 | Viruses; Duplodnaviria; Heunggongvirae; Uroviricota; Caudoviricetes; Caudovirales; Siphoviridae; Pahexavirus                           |
| 76 | KR347352 | Propionibacterium phage BruceLethal, complete genome | 29249 | Viruses; Duplodnaviria; Heunggongvirae; Uroviricota; Caudoviricetes; Caudovirales; Siphoviridae; Pahexavirus; unclassified Pahexavirus |
| 77 | KR347353 | Propionibacterium phage Enoki, complete genome       | 29347 | Viruses; Duplodnaviria; Heunggongvirae; Uroviricota; Caudoviricetes; Caudovirales; Siphoviridae; Pahexavirus; unclassified Pahexavirus |
| 78 | KR347354 | Propionibacterium phage Moyashi, complete genome     | 29254 | Viruses; Duplodnaviria; Heunggongvirae; Uroviricota; Caudoviricetes; Caudovirales; Siphoviridae; Pahexavirus; unclassified Pahexavirus |
| 79 | KR347355 | Propionibacterium phage QueenBey, complete genome    | 29338 | Viruses; Duplodnaviria; Heunggongvirae; Uroviricota; Caudoviricetes; Caudovirales; Siphoviridae; Pahexavirus; unclassified Pahexavirus |
| 80 | KR902978 | Propionibacterium phage PAC1, complete genome        | 29605 | Viruses; Duplodnaviria; Heunggongvirae; Uroviricota; Caudoviricetes; Caudovirales; Siphoviridae; Pahexavirus; unclassified Pahexavirus |
| 81 | KR902979 | Propionibacterium phage PAC2, complete genome        | 29602 | Viruses; Duplodnaviria; Heunggongvirae; Uroviricota; Caudoviricetes; Caudovirales; Siphoviridae; Pahexavirus; unclassified Pahexavirus |
| 82 | KR902980 | Propionibacterium phage PAC3, complete genome        | 29526 | Viruses; Duplodnaviria; Heunggongvirae; Uroviricota; Caudoviricetes; Caudovirales; Siphoviridae; Pahexavirus; unclassified Pahexavirus |
| 83 | KR902981 | Propionibacterium phage PAC4, complete genome        | 29581 | Viruses; Duplodnaviria; Heunggongvirae; Uroviricota; Caudoviricetes; Caudovirales; Siphoviridae; Pahexavirus; unclassified Pahexavirus |
| 84 | KR902982 | Propionibacterium phage PAC5, complete genome        | 29428 | Viruses; Duplodnaviria; Heunggongvirae; Uroviricota; Caudoviricetes; Caudovirales; Siphoviridae; Pahexavirus; unclassified Pahexavirus |
| 85 | KR902983 | Propionibacterium phage PAC6, complete genome        | 29609 | Viruses; Duplodnaviria; Heunggongvirae; Uroviricota; Caudoviricetes; Caudovirales; Siphoviridae; Pahexavirus; unclassified Pahexavirus |



|     |          |                                                      |       |                                                                                                                                        |
|-----|----------|------------------------------------------------------|-------|----------------------------------------------------------------------------------------------------------------------------------------|
| 86  | KR902984 | Propionibacterium phage PAC7, complete genome        | 29551 | Viruses; Duplodnaviria; Heunggongvirae; Uroviricota; Caudoviricetes; Caudovirales; Siphoviridae; Pahexavirus; unclassified Pahexavirus |
| 87  | KR902985 | Propionibacterium phage PAC8, complete genome        | 29488 | Viruses; Duplodnaviria; Heunggongvirae; Uroviricota; Caudoviricetes; Caudovirales; Siphoviridae; Pahexavirus; unclassified Pahexavirus |
| 88  | KR902986 | Propionibacterium phage PAC9, complete genome        | 29786 | Viruses; Duplodnaviria; Heunggongvirae; Uroviricota; Caudoviricetes; Caudovirales; Siphoviridae; Pahexavirus; unclassified Pahexavirus |
| 89  | KR902987 | Propionibacterium phage PAC10, complete genome       | 29704 | Viruses; Duplodnaviria; Heunggongvirae; Uroviricota; Caudoviricetes; Caudovirales; Siphoviridae; Pahexavirus; unclassified Pahexavirus |
| 90  | KT934381 | Propionibacterium phage PA1-14, complete genome      | 29407 | Viruses; Duplodnaviria; Heunggongvirae; Uroviricota; Caudoviricetes; Caudovirales; Siphoviridae; Pahexavirus; unclassified Pahexavirus |
| 91  | KY926792 | Propionibacterium phage PacnesP1, complete genome    | 29533 | Viruses; Duplodnaviria; Heunggongvirae; Uroviricota; Caudoviricetes; Caudovirales; Siphoviridae; Pahexavirus; unclassified Pahexavirus |
| 92  | KY926793 | Propionibacterium phage PacnesP2, complete genome    | 30016 | Viruses; Duplodnaviria; Heunggongvirae; Uroviricota; Caudoviricetes; Caudovirales; Siphoviridae; Pahexavirus; unclassified Pahexavirus |
| 93  | MF919491 | Propionibacterium phage Aquarius, complete genome    | 30112 | Viruses; Duplodnaviria; Heunggongvirae; Uroviricota; Caudoviricetes; Caudovirales; Siphoviridae; Pahexavirus; unclassified Pahexavirus |
| 94  | MF919505 | Propionibacterium phage DrParker, complete genome    | 29742 | Viruses; Duplodnaviria; Heunggongvirae; Uroviricota; Caudoviricetes; Caudovirales; Siphoviridae; Pahexavirus; unclassified Pahexavirus |
| 95  | MF919515 | Propionibacterium phage Leviosa, complete genome     | 29451 | Viruses; Duplodnaviria; Heunggongvirae; Uroviricota; Caudoviricetes; Caudovirales; Siphoviridae; Pahexavirus; unclassified Pahexavirus |
| 96  | MF919516 | Propionibacterium phage LilBandit, complete genome   | 29041 | Viruses; Duplodnaviria; Heunggongvirae; Uroviricota; Caudoviricetes; Caudovirales; Siphoviridae; Pahexavirus; unclassified Pahexavirus |
| 97  | MF919522 | Propionibacterium phage MEAK, complete genome        | 29223 | Viruses; Duplodnaviria; Heunggongvirae; Uroviricota; Caudoviricetes; Caudovirales; Siphoviridae; Pahexavirus; unclassified Pahexavirus |
| 98  | MF919533 | Propionibacterium phage Supernova, complete genome   | 29217 | Viruses; Duplodnaviria; Heunggongvirae; Uroviricota; Caudoviricetes; Caudovirales; Siphoviridae; Pahexavirus; unclassified Pahexavirus |
| 99  | MG820632 | Propionibacterium phage pa310, complete genome       | 29508 | Viruses; Duplodnaviria; Heunggongvirae; Uroviricota; Caudoviricetes; Caudovirales; Siphoviridae; Pahexavirus; unclassified Pahexavirus |
| 100 | MG820633 | Propionibacterium phage pa59, complete genome        | 29507 | Viruses; Duplodnaviria; Heunggongvirae; Uroviricota; Caudoviricetes; Caudovirales; Siphoviridae; Pahexavirus; unclassified Pahexavirus |
| 101 | MG820634 | Propionibacterium phage pa27, complete genome        | 29593 | Viruses; Duplodnaviria; Heunggongvirae; Uroviricota; Caudoviricetes; Caudovirales; Siphoviridae; Pahexavirus; unclassified Pahexavirus |
| 102 | MG820635 | Propionibacterium phage pa29399-1-D_1, complete geno | 29370 | Viruses; Duplodnaviria; Heunggongvirae; Uroviricota; Caudoviricetes; Caudovirales; Siphoviridae; Pahexavirus; unclassified Pahexavirus |
| 103 | MG820636 | Propionibacterium phage pa29399-1-D_2, complete geno | 28892 | Viruses; Duplodnaviria; Heunggongvirae; Uroviricota; Caudoviricetes; Caudovirales; Siphoviridae; Pahexavirus; unclassified Pahexavirus |
| 104 | MG820637 | Propionibacterium phage pa63, complete genome        | 29446 | Viruses; Duplodnaviria; Heunggongvirae; Uroviricota; Caudoviricetes; Caudovirales; Siphoviridae; Pahexavirus; unclassified Pahexavirus |
| 105 | MG820638 | Propionibacterium phage pa6919-4, complete genome    | 29784 | Viruses; Duplodnaviria; Heunggongvirae; Uroviricota; Caudoviricetes; Caudovirales; Siphoviridae; Pahexavirus; unclassified Pahexavirus |
| 106 | MG820639 | Propionibacterium phage pa9-6919-4, complete genome  | 29784 | Viruses; Duplodnaviria; Heunggongvirae; Uroviricota; Caudoviricetes; Caudovirales; Siphoviridae; Pahexavirus; unclassified Pahexavirus |
| 107 | MG820640 | Propionibacterium phage pa15, complete genome        | 29309 | Viruses; Duplodnaviria; Heunggongvirae; Uroviricota; Caudoviricetes; Caudovirales; Siphoviridae; Pahexavirus; unclassified Pahexavirus |

|     |          |                                                   |       |                                                                                                                                        |
|-----|----------|---------------------------------------------------|-------|----------------------------------------------------------------------------------------------------------------------------------------|
| 108 | MG820641 | Propionibacterium phage pa615, complete genome    | 29307 | Viruses; Duplodnaviria; Heunggongvirae; Uroviricota; Caudoviricetes; Caudovirales; Siphoviridae; Pahexavirus; unclassified Pahexavirus |
| 109 | MG820642 | Propionibacterium phage pa28, complete genome     | 29733 | Viruses; Duplodnaviria; Heunggongvirae; Uroviricota; Caudoviricetes; Caudovirales; Siphoviridae; Pahexavirus; unclassified Pahexavirus |
| 110 | MG820643 | Propionibacterium phage pa35, complete genome     | 29491 | Viruses; Duplodnaviria; Heunggongvirae; Uroviricota; Caudoviricetes; Caudovirales; Siphoviridae; Pahexavirus; unclassified Pahexavirus |
| 111 | MG820644 | Propionibacterium phage pa33, complete genome     | 29135 | Viruses; Duplodnaviria; Heunggongvirae; Uroviricota; Caudoviricetes; Caudovirales; Siphoviridae; Pahexavirus; unclassified Pahexavirus |
| 112 | MG820645 | Propionibacterium phage pa3-SS3, complete genome  | 29137 | Viruses; Duplodnaviria; Heunggongvirae; Uroviricota; Caudoviricetes; Caudovirales; Siphoviridae; Pahexavirus; unclassified Pahexavirus |
| 113 | MN329678 | Propionibacterium phage Cota, complete genome     | 29549 | Viruses; Duplodnaviria; Heunggongvirae; Uroviricota; Caudoviricetes; Caudovirales; Siphoviridae; Pahexavirus; unclassified Pahexavirus |
| 114 | MN813675 | Cutibacterium phage P104B, complete genome        | 29330 | Viruses; Duplodnaviria; Heunggongvirae; Uroviricota; Caudoviricetes; Caudovirales; Siphoviridae; Pahexavirus; unclassified Pahexavirus |
| 115 | MN813677 | Cutibacterium phage P107C, complete genome        | 29516 | Viruses; Duplodnaviria; Heunggongvirae; Uroviricota; Caudoviricetes; Caudovirales; Siphoviridae; Pahexavirus; unclassified Pahexavirus |
| 116 | MN813679 | Cutibacterium phage P107A, complete genome        | 29465 | Viruses; Duplodnaviria; Heunggongvirae; Uroviricota; Caudoviricetes; Caudovirales; Siphoviridae; Pahexavirus; unclassified Pahexavirus |
| 117 | MN813683 | Cutibacterium phage P108C, complete genome        | 29494 | Viruses; Duplodnaviria; Heunggongvirae; Uroviricota; Caudoviricetes; Caudovirales; Siphoviridae; Pahexavirus; unclassified Pahexavirus |
| 118 | MN813688 | Cutibacterium phage P106I, complete genome        | 29470 | Viruses; Duplodnaviria; Heunggongvirae; Uroviricota; Caudoviricetes; Caudovirales; Siphoviridae; Pahexavirus; unclassified Pahexavirus |
| 119 | MN813689 | Cutibacterium phage P106L, complete genome        | 29641 | Viruses; Duplodnaviria; Heunggongvirae; Uroviricota; Caudoviricetes; Caudovirales; Siphoviridae; Pahexavirus; unclassified Pahexavirus |
| 120 | MN813690 | Cutibacterium phage P106M, complete genome        | 29641 | Viruses; Duplodnaviria; Heunggongvirae; Uroviricota; Caudoviricetes; Caudovirales; Siphoviridae; Pahexavirus; unclassified Pahexavirus |
| 121 | MN813691 | Cutibacterium phage P106A, complete genome        | 29554 | Viruses; Duplodnaviria; Heunggongvirae; Uroviricota; Caudoviricetes; Caudovirales; Siphoviridae; Pahexavirus; unclassified Pahexavirus |
| 122 | MN813692 | Cutibacterium phage P106C, complete genome        | 29641 | Viruses; Duplodnaviria; Heunggongvirae; Uroviricota; Caudoviricetes; Caudovirales; Siphoviridae; Pahexavirus; unclassified Pahexavirus |
| 123 | MT647607 | Propionibacterium phage phiPA50S, complete genome | 29590 | Viruses; Duplodnaviria; Heunggongvirae; Uroviricota; Caudoviricetes; Caudovirales; Siphoviridae; Pahexavirus; unclassified Pahexavirus |
| 124 | MW161461 | Cutibacterium phage FD1, complete genome          | 29774 | Viruses; Duplodnaviria; Heunggongvirae; Uroviricota; Caudoviricetes; Caudovirales; Siphoviridae; Pahexavirus; unclassified Pahexavirus |
| 125 | MW161462 | Cutibacterium phage FD2, complete genome          | 29768 | Viruses; Duplodnaviria; Heunggongvirae; Uroviricota; Caudoviricetes; Caudovirales; Siphoviridae; Pahexavirus; unclassified Pahexavirus |
| 126 | MW161463 | Cutibacterium phage FD3, complete genome          | 29638 | Viruses; Duplodnaviria; Heunggongvirae; Uroviricota; Caudoviricetes; Caudovirales; Siphoviridae; Pahexavirus; unclassified Pahexavirus |
| 127 | MW161464 | Cutibacterium phage PAVL20, complete genome       | 29800 | Viruses; Duplodnaviria; Heunggongvirae; Uroviricota; Caudoviricetes; Caudovirales; Siphoviridae; Pahexavirus; unclassified Pahexavirus |
| 128 | MW161465 | Cutibacterium phage PAVL21, complete genome       | 30034 | Viruses; Duplodnaviria; Heunggongvirae; Uroviricota; Caudoviricetes; Caudovirales; Siphoviridae; Pahexavirus; unclassified Pahexavirus |
| 129 | MW161466 | Cutibacterium phage PAVL33, complete genome       | 29627 | Viruses; Duplodnaviria; Heunggongvirae; Uroviricota; Caudoviricetes; Caudovirales; Siphoviridae; Pahexavirus; unclassified Pahexavirus |

|     |           |                                                       |       |                                                                                                                                        |
|-----|-----------|-------------------------------------------------------|-------|----------------------------------------------------------------------------------------------------------------------------------------|
| 130 | MW161467  | Cutibacterium phage PAVL34, complete genome           | 29535 | Viruses; Duplodnaviria; Heunggongvirae; Uroviricota; Caudoviricetes; Caudovirales; Siphoviridae; Pahexavirus; unclassified Pahexavirus |
| 131 | MW161468  | Cutibacterium phage PAVL45, complete genome           | 29772 | Viruses; Duplodnaviria; Heunggongvirae; Uroviricota; Caudoviricetes; Caudovirales; Siphoviridae; Pahexavirus; unclassified Pahexavirus |
| 132 | NC_009541 | Propionibacterium phage PA6, complete genome          | 29739 | Viruses; Duplodnaviria; Heunggongvirae; Uroviricota; Caudoviricetes; Caudovirales; Siphoviridae; Pahexavirus                           |
| 133 | NC_015453 | Propionibacterium phage PAS50 endogenous virus, compl | 29017 | Viruses; Duplodnaviria; Heunggongvirae; Uroviricota; Caudoviricetes; Caudovirales; Siphoviridae; Pahexavirus                           |
| 134 | NC_015454 | Propionibacterium phage PAD20 endogenous virus, compl | 29074 | Viruses; Duplodnaviria; Heunggongvirae; Uroviricota; Caudoviricetes; Caudovirales; Siphoviridae; Pahexavirus                           |
| 135 | NC_018834 | Propionibacterium phage P9.1, complete genome         | 29214 | Viruses; Duplodnaviria; Heunggongvirae; Uroviricota; Caudoviricetes; Caudovirales; Siphoviridae; Pahexavirus                           |
| 136 | NC_018838 | Propionibacterium phage P100_A, complete genome       | 29505 | Viruses; Duplodnaviria; Heunggongvirae; Uroviricota; Caudoviricetes; Caudovirales; Siphoviridae; Pahexavirus                           |
| 137 | NC_018839 | Propionibacterium phage P14.4, complete genome        | 29729 | Viruses; Duplodnaviria; Heunggongvirae; Uroviricota; Caudoviricetes; Caudovirales; Siphoviridae; Pahexavirus                           |
| 138 | NC_018840 | Propionibacterium phage P100_1, complete genome       | 29612 | Viruses; Duplodnaviria; Heunggongvirae; Uroviricota; Caudoviricetes; Caudovirales; Siphoviridae; Pahexavirus                           |
| 139 | NC_018841 | Propionibacterium phage P101A, complete genome        | 29574 | Viruses; Duplodnaviria; Heunggongvirae; Uroviricota; Caudoviricetes; Caudovirales; Siphoviridae; Pahexavirus                           |
| 140 | NC_018842 | Propionibacterium phage P1.1, complete genome         | 29348 | Viruses; Duplodnaviria; Heunggongvirae; Uroviricota; Caudoviricetes; Caudovirales; Siphoviridae; Pahexavirus                           |
| 141 | NC_018845 | Propionibacterium phage P104A, complete genome        | 29371 | Viruses; Duplodnaviria; Heunggongvirae; Uroviricota; Caudoviricetes; Caudovirales; Siphoviridae; Pahexavirus                           |
| 142 | NC_018847 | Propionibacterium phage ATCC29399B_T, complete geno   | 29516 | Viruses; Duplodnaviria; Heunggongvirae; Uroviricota; Caudoviricetes; Caudovirales; Siphoviridae; Pahexavirus                           |
| 143 | NC_018849 | Propionibacterium phage P105, complete genome         | 29202 | Viruses; Duplodnaviria; Heunggongvirae; Uroviricota; Caudoviricetes; Caudovirales; Siphoviridae; Pahexavirus                           |
| 144 | NC_018851 | Propionibacterium phage ATCC29399B_C, complete geno   | 29516 | Viruses; Duplodnaviria; Heunggongvirae; Uroviricota; Caudoviricetes; Caudovirales; Siphoviridae; Pahexavirus                           |
| 145 | NC_018852 | Propionibacterium phage P100D, complete genome        | 29506 | Viruses; Duplodnaviria; Heunggongvirae; Uroviricota; Caudoviricetes; Caudovirales; Siphoviridae; Pahexavirus                           |
| 146 | NC_022334 | Propionibacterium phage PHL112N00, complete genome    | 29266 | Viruses; Duplodnaviria; Heunggongvirae; Uroviricota; Caudoviricetes; Caudovirales; Siphoviridae; Pahexavirus                           |
| 147 | NC_022335 | Propionibacterium phage PHL067M10, complete genome    | 29377 | Viruses; Duplodnaviria; Heunggongvirae; Uroviricota; Caudoviricetes; Caudovirales; Siphoviridae; Pahexavirus; unclassified Pahexavirus |
| 148 | NC_022336 | Propionibacterium phage PHL010M04, complete genome    | 29511 | Viruses; Duplodnaviria; Heunggongvirae; Uroviricota; Caudoviricetes; Caudovirales; Siphoviridae; Pahexavirus; unclassified Pahexavirus |
| 149 | NC_022337 | Propionibacterium phage PHL071N05, complete genome    | 29467 | Viruses; Duplodnaviria; Heunggongvirae; Uroviricota; Caudoviricetes; Caudovirales; Siphoviridae; Pahexavirus                           |

|     |           |                                                       |       |                                                                                                                                        |
|-----|-----------|-------------------------------------------------------|-------|----------------------------------------------------------------------------------------------------------------------------------------|
| 150 | NC_022338 | Propionibacterium phage PHL060L00, complete genome    | 29514 | Viruses; Duplodnaviria; Heunggongvirae; Uroviricota; Caudoviricetes; Caudovirales; Siphoviridae; Pahexavirus                           |
| 151 | NC_022339 | Propionibacterium phage PHL037M02, complete genome    | 29443 | Viruses; Duplodnaviria; Heunggongvirae; Uroviricota; Caudoviricetes; Caudovirales; Siphoviridae; Pahexavirus                           |
| 152 | NC_022340 | Propionibacterium phage PHL114L00, complete genome    | 29464 | Viruses; Duplodnaviria; Heunggongvirae; Uroviricota; Caudoviricetes; Caudovirales; Siphoviridae; Pahexavirus                           |
| 153 | NC_022341 | Propionibacterium phage PHL113M01, complete genome    | 29200 | Viruses; Duplodnaviria; Heunggongvirae; Uroviricota; Caudoviricetes; Caudovirales; Siphoviridae; Pahexavirus                           |
| 154 | NC_022342 | Propionibacterium phage PHL111M01, complete genome    | 29140 | Viruses; Duplodnaviria; Heunggongvirae; Uroviricota; Caudoviricetes; Caudovirales; Siphoviridae; Pahexavirus                           |
| 155 | NC_027294 | Propionibacterium phage PHL150M00, complete genome    | 29438 | Viruses; Duplodnaviria; Heunggongvirae; Uroviricota; Caudoviricetes; Caudovirales; Siphoviridae; Pahexavirus; unclassified Pahexavirus |
| 156 | NC_027295 | Propionibacterium phage PHL199M00, complete genome    | 29806 | Viruses; Duplodnaviria; Heunggongvirae; Uroviricota; Caudoviricetes; Caudovirales; Siphoviridae; Pahexavirus                           |
| 157 | NC_027333 | Propionibacterium phage PHL070N00, complete genome    | 29421 | Viruses; Duplodnaviria; Heunggongvirae; Uroviricota; Caudoviricetes; Caudovirales; Siphoviridae; Pahexavirus                           |
| 158 | NC_027336 | Propionibacterium phage PHL009M11, complete genome    | 29503 | Viruses; Duplodnaviria; Heunggongvirae; Uroviricota; Caudoviricetes; Caudovirales; Siphoviridae; Pahexavirus                           |
| 159 | NC_027346 | Propionibacterium phage PHL171M01, complete genome    | 29327 | Viruses; Duplodnaviria; Heunggongvirae; Uroviricota; Caudoviricetes; Caudovirales; Siphoviridae; Pahexavirus                           |
| 160 | NC_027347 | Propionibacterium phage PHL151M00, complete genome    | 29511 | Viruses; Duplodnaviria; Heunggongvirae; Uroviricota; Caudoviricetes; Caudovirales; Siphoviridae; Pahexavirus                           |
| 161 | NC_027354 | Propionibacterium phage PHL301M00, complete genome    | 29323 | Viruses; Duplodnaviria; Heunggongvirae; Uroviricota; Caudoviricetes; Caudovirales; Siphoviridae; Pahexavirus                           |
| 162 | NC_027357 | Propionibacterium phage PHL025M00, complete genome    | 29496 | Viruses; Duplodnaviria; Heunggongvirae; Uroviricota; Caudoviricetes; Caudovirales; Siphoviridae; Pahexavirus                           |
| 163 | NC_027359 | Propionibacterium phage PHL082M00, complete genome    | 29491 | Viruses; Duplodnaviria; Heunggongvirae; Uroviricota; Caudoviricetes; Caudovirales; Siphoviridae; Pahexavirus; unclassified Pahexavirus |
| 164 | NC_027361 | Propionibacterium phage PHL085N00, complete genome    | 29454 | Viruses; Duplodnaviria; Heunggongvirae; Uroviricota; Caudoviricetes; Caudovirales; Siphoviridae; Pahexavirus; unclassified Pahexavirus |
| 165 | NC_027362 | Propionibacterium phage PHL116M00, complete genome    | 29394 | Viruses; Duplodnaviria; Heunggongvirae; Uroviricota; Caudoviricetes; Caudovirales; Siphoviridae; Pahexavirus                           |
| 166 | NC_027367 | Propionibacterium phage PHL132N00, complete genome    | 29003 | Viruses; Duplodnaviria; Heunggongvirae; Uroviricota; Caudoviricetes; Caudovirales; Siphoviridae; Pahexavirus                           |
| 167 | NC_027370 | Propionibacterium phage PHL179M00, complete genome    | 29428 | Viruses; Duplodnaviria; Heunggongvirae; Uroviricota; Caudoviricetes; Caudovirales; Siphoviridae; Pahexavirus                           |
| 168 | NC_027371 | Propionibacterium phage Pacnes 2012-15, complete geno | 29741 | Viruses; Duplodnaviria; Heunggongvirae; Uroviricota; Caudoviricetes; Caudovirales; Siphoviridae; Pahexavirus                           |
| 169 | NC_027373 | Propionibacterium phage PHL030N00, complete genome    | 29423 | Viruses; Duplodnaviria; Heunggongvirae; Uroviricota; Caudoviricetes; Caudovirales; Siphoviridae; Pahexavirus; unclassified Pahexavirus |
| 170 | NC_027376 | Propionibacterium phage PHL308M00, complete genome    | 29442 | Viruses; Duplodnaviria; Heunggongvirae; Uroviricota; Caudoviricetes; Caudovirales; Siphoviridae; Pahexavirus                           |
| 171 | NC_027380 | Propionibacterium phage PHL067M01, complete genome    | 29377 | Viruses; Duplodnaviria; Heunggongvirae; Uroviricota; Caudoviricetes; Caudovirales; Siphoviridae; Pahexavirus                           |

|     |           |                                                    |       |                                                                                                                                        |
|-----|-----------|----------------------------------------------------|-------|----------------------------------------------------------------------------------------------------------------------------------------|
| 172 | NC_027385 | Propionibacterium phage PHL092M00, complete genome | 29261 | Viruses; Duplodnaviria; Heunggongvirae; Uroviricota; Caudoviricetes; Caudovirales; Siphoviridae; Pahexavirus                           |
| 173 | NC_027386 | Propionibacterium phage PHL152M00, complete genome | 29247 | Viruses; Duplodnaviria; Heunggongvirae; Uroviricota; Caudoviricetes; Caudovirales; Siphoviridae; Pahexavirus                           |
| 174 | NC_027389 | Propionibacterium phage PHL141N00, complete genome | 29494 | Viruses; Duplodnaviria; Heunggongvirae; Uroviricota; Caudoviricetes; Caudovirales; Siphoviridae; Pahexavirus                           |
| 175 | NC_027391 | Propionibacterium phage PHL041M10, complete genome | 29412 | Viruses; Duplodnaviria; Heunggongvirae; Uroviricota; Caudoviricetes; Caudovirales; Siphoviridae; Pahexavirus                           |
| 176 | NC_027392 | Propionibacterium phage PHL194M00, complete genome | 29264 | Viruses; Duplodnaviria; Heunggongvirae; Uroviricota; Caudoviricetes; Caudovirales; Siphoviridae; Pahexavirus                           |
| 177 | NC_027400 | Propionibacterium phage PHL055N00, complete genome | 29264 | Viruses; Duplodnaviria; Heunggongvirae; Uroviricota; Caudoviricetes; Caudovirales; Siphoviridae; Pahexavirus; unclassified Pahexavirus |
| 178 | NC_027401 | Propionibacterium phage PHL095N00, complete genome | 29751 | Viruses; Duplodnaviria; Heunggongvirae; Uroviricota; Caudoviricetes; Caudovirales; Siphoviridae; Pahexavirus                           |
| 179 | NC_027403 | Propionibacterium phage PHL117M00, complete genome | 29255 | Viruses; Duplodnaviria; Heunggongvirae; Uroviricota; Caudoviricetes; Caudovirales; Siphoviridae; Pahexavirus                           |
| 180 | NC_027405 | Propionibacterium phage PHL163M00, complete genome | 29264 | Viruses; Duplodnaviria; Heunggongvirae; Uroviricota; Caudoviricetes; Caudovirales; Siphoviridae; Pahexavirus                           |
| 181 | NC_027620 | Propionibacterium phage MrAK, complete genome      | 29726 | Viruses; Duplodnaviria; Heunggongvirae; Uroviricota; Caudoviricetes; Caudovirales; Siphoviridae; Pahexavirus                           |
| 182 | NC_027621 | Propionibacterium phage Wizzo, complete genome     | 29463 | Viruses; Duplodnaviria; Heunggongvirae; Uroviricota; Caudoviricetes; Caudovirales; Siphoviridae; Pahexavirus                           |
| 183 | NC_027622 | Propionibacterium phage Stormborn, complete genome | 29330 | Viruses; Duplodnaviria; Heunggongvirae; Uroviricota; Caudoviricetes; Caudovirales; Siphoviridae; Pahexavirus                           |
| 184 | NC_027623 | Propionibacterium phage Pirate, complete genome    | 29324 | Viruses; Duplodnaviria; Heunggongvirae; Uroviricota; Caudoviricetes; Caudovirales; Siphoviridae; Pahexavirus                           |
| 185 | NC_027624 | Propionibacterium phage SKKY, complete genome      | 29594 | Viruses; Duplodnaviria; Heunggongvirae; Uroviricota; Caudoviricetes; Caudovirales; Siphoviridae; Pahexavirus                           |
| 186 | NC_027625 | Propionibacterium phage Kubed, complete genome     | 29461 | Viruses; Duplodnaviria; Heunggongvirae; Uroviricota; Caudoviricetes; Caudovirales; Siphoviridae; Pahexavirus                           |
| 187 | NC_027626 | Propionibacterium phage Procrass1, complete genome | 29347 | Viruses; Duplodnaviria; Heunggongvirae; Uroviricota; Caudoviricetes; Caudovirales; Siphoviridae; Pahexavirus                           |
| 188 | NC_027627 | Propionibacterium phage Solid, complete genome     | 29440 | Viruses; Duplodnaviria; Heunggongvirae; Uroviricota; Caudoviricetes; Caudovirales; Siphoviridae; Pahexavirus                           |
| 189 | NC_027628 | Propionibacterium phage Lauchelly, complete genome | 29517 | Viruses; Duplodnaviria; Heunggongvirae; Uroviricota; Caudoviricetes; Caudovirales; Siphoviridae; Pahexavirus                           |
| 190 | NC_027629 | Propionibacterium phage Attacne, complete genome   | 28876 | Viruses; Duplodnaviria; Heunggongvirae; Uroviricota; Caudoviricetes; Caudovirales; Siphoviridae; Pahexavirus                           |
| 191 | NC_027630 | Propionibacterium phage Ouroboros, complete genome | 29506 | Viruses; Duplodnaviria; Heunggongvirae; Uroviricota; Caudoviricetes; Caudovirales; Siphoviridae; Pahexavirus                           |
| 192 | NC_028694 | Propionibacterium phage PA1-14, complete genome    | 29407 | Viruses; Duplodnaviria; Heunggongvirae; Uroviricota; Caudoviricetes; Caudovirales; Siphoviridae; Pahexavirus; unclassified Pahexavirus |
| 193 | NC_028967 | Propionibacterium phage PAC1, complete genome      | 29605 | Viruses; Duplodnaviria; Heunggongvirae; Uroviricota; Caudoviricetes; Caudovirales; Siphoviridae; Pahexavirus; unclassified Pahexavirus |

|     |           |                                                      |       |                                                                                                                                        |
|-----|-----------|------------------------------------------------------|-------|----------------------------------------------------------------------------------------------------------------------------------------|
| 194 | NC_031003 | Propionibacterium phage Moyashi, complete genome     | 29254 | Viruses; Duplodnaviria; Heunggongvirae; Uroviricota; Caudoviricetes; Caudovirales; Siphoviridae; Pahexavirus; unclassified Pahexavirus |
| 195 | NC_031005 | Propionibacterium phage QueenBey, complete genome    | 29338 | Viruses; Duplodnaviria; Heunggongvirae; Uroviricota; Caudoviricetes; Caudovirales; Siphoviridae; Pahexavirus; unclassified Pahexavirus |
| 196 | NC_031084 | Propionibacterium phage BruceLethal, complete genome | 29249 | Viruses; Duplodnaviria; Heunggongvirae; Uroviricota; Caudoviricetes; Caudovirales; Siphoviridae; Pahexavirus; unclassified Pahexavirus |
| 197 | NC_031119 | Propionibacterium phage Enoki, complete genome       | 29347 | Viruses; Duplodnaviria; Heunggongvirae; Uroviricota; Caudoviricetes; Caudovirales; Siphoviridae; Pahexavirus; unclassified Pahexavirus |
| 198 | NC_041954 | Propionibacterium phage Keiki, complete genome       | 29339 | Viruses; Duplodnaviria; Heunggongvirae; Uroviricota; Caudoviricetes; Caudovirales; Siphoviridae; Pahexavirus                           |
| 199 | NC_041955 | Propionibacterium phage PHL082M03, complete genome   | 29491 | Viruses; Duplodnaviria; Heunggongvirae; Uroviricota; Caudoviricetes; Caudovirales; Siphoviridae; Pahexavirus                           |
| 200 | NC_041956 | Propionibacterium phage PHL117M01, complete genome   | 29422 | Viruses; Duplodnaviria; Heunggongvirae; Uroviricota; Caudoviricetes; Caudovirales; Siphoviridae; Pahexavirus                           |
| 201 | NC_041957 | Propionibacterium phage PHL151N00, complete genome   | 29511 | Viruses; Duplodnaviria; Heunggongvirae; Uroviricota; Caudoviricetes; Caudovirales; Siphoviridae; Pahexavirus                           |

**Table S2.**

Annotation of the CDSs of the eight phages isolated in this work. The annotations were performed using RAST version 2 (<https://rast.nmpdr.org/rast.cgi>, accessed on March 1, 2021), Phage Search Tool Enhanced Release (PHASTER) (<https://phaster.ca>, accessed on March 1, 2021), and the BLAST server.

**Table S2.**

| Index | Sequence Name | Protein id | Start | End   | Length | Direction | Annotation                           |
|-------|---------------|------------|-------|-------|--------|-----------|--------------------------------------|
| 1     | FD1           | QPB11540.1 | 22042 | 23553 | 1512   | forward   | hypothetical protein CDS             |
| 2     | FD1           | QPB11541.1 | 23550 | 24875 | 1326   | forward   | hypothetical protein CDS             |
| 3     | FD1           | QPB11506.1 | 4134  | 5297  | 1164   | forward   | hypothetical protein CDS             |
| 4     | FD1           | QPB11517.1 | 10181 | 11218 | 1038   | reverse   | hypothetical protein CDS             |
| 5     | FD1           | QPB11505.1 | 3186  | 4133  | 948    | forward   | hypothetical protein CDS             |
| 6     | FD1           | QPB11527.1 | 15602 | 16549 | 948    | reverse   | exonuclease CDS                      |
| 7     | FD1           | QPB11545.1 | 26311 | 27258 | 948    | forward   | hypothetical protein CDS             |
| 8     | FD1           | QPB11507.1 | 5317  | 6135  | 819    | forward   | hypothetical protein CDS             |
| 9     | FD1           | QPB11509.1 | 6443  | 7249  | 807    | forward   | hypothetical protein CDS             |
| 10    | FD1           | QPB11542.1 | 24882 | 25637 | 756    | forward   | hypothetical protein CDS             |
| 11    | FD1           | QPB11523.1 | 13782 | 14522 | 741    | reverse   | hypothetical protein CDS             |
| 12    | FD1           | QPB11521.1 | 12557 | 13228 | 672    | reverse   | DNA primase CDS                      |
| 13    | FD1           | QPB11510.1 | 7495  | 8148  | 654    | forward   | hypothetical protein CDS             |
| 14    | FD1           | QPB11501.1 | 1280  | 1900  | 621    | reverse   | hypothetical protein CDS             |
| 15    | FD1           | QPB11550.1 | 28832 | 29431 | 600    | forward   | hypothetical protein CDS             |
| 16    | FD1           | QPB11520.1 | 11950 | 12513 | 564    | reverse   | hypothetical protein CDS             |
| 17    | FD1           | QPB11519.1 | 11393 | 11953 | 561    | reverse   | hypothetical protein CDS             |
| 18    | FD1           | QPB11531.1 | 17466 | 17999 | 534    | reverse   | hypothetical protein CDS             |
| 19    | FD1           | QPB11513.1 | 8647  | 9168  | 522    | reverse   | hypothetical protein CDS             |
| 20    | FD1           | QPB11546.1 | 27302 | 27766 | 465    | forward   | hypothetical protein CDS             |
| 21    | FD1           | QPB11504.1 | 2709  | 3170  | 462    | forward   | tail length tape-measure protein CDS |
| 22    | FD1           | QPB11544.1 | 25876 | 26304 | 429    | forward   | hypothetical protein CDS             |
| 23    | FD1           | QPB11532.1 | 18230 | 18646 | 417    | forward   | hypothetical protein CDS             |
| 24    | FD1           | QPB11526.1 | 15195 | 15605 | 411    | reverse   | hypothetical protein CDS             |
| 25    | FD1           | QPB11514.1 | 9173  | 9565  | 393    | reverse   | hypothetical protein CDS             |
| 26    | FD1           | QPB11539.1 | 21666 | 22037 | 372    | forward   | hypothetical protein CDS             |
| 27    | FD1           | QPB11549.1 | 28409 | 28780 | 372    | forward   | hypothetical protein CDS             |
| 28    | FD1           | QPB11528.1 | 16549 | 16908 | 360    | reverse   | hypothetical protein CDS             |
| 29    | FD1           | QPB11522.1 | 13426 | 13782 | 357    | reverse   | hypothetical protein CDS             |
| 30    | FD1           | QPB11547.1 | 27768 | 28115 | 348    | forward   | hypothetical protein CDS             |
| 31    | FD1           | QPB11516.1 | 9853  | 10173 | 321    | reverse   | hypothetical protein CDS             |
| 32    | FD1           | QPB11499.1 | 387   | 692   | 306    | reverse   | hypothetical protein CDS             |
| 33    | FD1           | QPB11502.1 | 1952  | 2251  | 300    | reverse   | hypothetical protein CDS             |
| 34    | FD1           | QPB11548.1 | 28122 | 28412 | 291    | forward   | hypothetical protein CDS             |
| 35    | FD1           | QPB11503.1 | 2432  | 2710  | 279    | reverse   | hypothetical protein CDS             |
| 36    | FD1           | QPB11515.1 | 9569  | 9835  | 267    | reverse   | hypothetical protein CDS             |
| 37    | FD1           | QPB11508.1 | 6177  | 6440  | 264    | forward   | hypothetical protein CDS             |
| 38    | FD1           | QPB11534.1 | 18871 | 19119 | 249    | forward   | hypothetical protein CDS             |
| 39    | FD1           | QPB11535.1 | 19270 | 19503 | 234    | reverse   | hypothetical protein CDS             |
| 40    | FD1           | QPB11524.1 | 14580 | 14807 | 228    | forward   | hypothetical protein CDS             |
| 41    | FD1           | QPB11530.1 | 17215 | 17442 | 228    | reverse   | hypothetical protein CDS             |

|    |     |            |       |       |      |         |                                      |
|----|-----|------------|-------|-------|------|---------|--------------------------------------|
| 42 | FD1 | QPB11533.1 | 18650 | 18871 | 222  | forward | hypothetical protein CDS             |
| 43 | FD1 | QPB11500.1 | 878   | 1081  | 204  | reverse | hypothetical protein CDS             |
| 44 | FD1 | QPB11529.1 | 17015 | 17218 | 204  | reverse | hypothetical protein CDS             |
| 45 | FD1 | QPB11518.1 | 11215 | 11409 | 195  | reverse | hypothetical protein CDS             |
| 46 | FD1 | QPB11525.1 | 14819 | 15013 | 195  | forward | hypothetical protein CDS             |
| 47 | FD1 | QPB11536.1 | 19738 | 19932 | 195  | reverse | hypothetical protein CDS             |
| 48 | FD1 | QPB11543.1 | 25669 | 25860 | 192  | reverse | hypothetical protein CDS             |
| 49 | FD1 | QPB11537.1 | 21248 | 21427 | 180  | reverse | hypothetical protein CDS             |
| 50 | FD1 | QPB11498.1 | 224   | 397   | 174  | forward | hypothetical protein CDS             |
| 51 | FD1 | QPB11538.1 | 21431 | 21604 | 174  | reverse | hypothetical protein CDS             |
| 52 | FD1 | QPB11511.1 | 8214  | 8384  | 171  | reverse | hypothetical protein CDS             |
| 53 | FD1 | QPB11512.1 | 8440  | 8562  | 123  | forward | putative holin CDS                   |
| 54 | FD2 | QPB11592.1 | 22036 | 23547 | 1512 | forward | hypothetical protein CDS             |
| 55 | FD2 | QPB11593.1 | 23544 | 24869 | 1326 | forward | hypothetical protein CDS             |
| 56 | FD2 | QPB11559.1 | 4134  | 5297  | 1164 | forward | hypothetical protein CDS             |
| 57 | FD2 | QPB11569.1 | 10181 | 11218 | 1038 | reverse | hypothetical protein CDS             |
| 58 | FD2 | QPB11558.1 | 3186  | 4133  | 948  | forward | hypothetical protein CDS             |
| 59 | FD2 | QPB11578.1 | 15602 | 16549 | 948  | reverse | exonuclease CDS                      |
| 60 | FD2 | QPB11596.1 | 26305 | 27234 | 930  | forward | hypothetical protein CDS             |
| 61 | FD2 | QPB11575.1 | 13782 | 14645 | 864  | reverse | hypothetical protein CDS             |
| 62 | FD2 | QPB11563.1 | 7291  | 8148  | 858  | forward | hypothetical protein CDS             |
| 63 | FD2 | QPB11560.1 | 5317  | 6135  | 819  | forward | hypothetical protein CDS             |
| 64 | FD2 | QPB11562.1 | 6443  | 7249  | 807  | forward | hypothetical protein CDS             |
| 65 | FD2 | QPB11594.1 | 24876 | 25631 | 756  | forward | hypothetical protein CDS             |
| 66 | FD2 | QPB11573.1 | 12557 | 13228 | 672  | reverse | DNA primase CDS                      |
| 67 | FD2 | QPB11601.1 | 28827 | 29456 | 630  | forward | hypothetical protein CDS             |
| 68 | FD2 | QPB11554.1 | 1280  | 1900  | 621  | reverse | hypothetical protein CDS             |
| 69 | FD2 | QPB11572.1 | 11950 | 12513 | 564  | reverse | hypothetical protein CDS             |
| 70 | FD2 | QPB11571.1 | 11393 | 11953 | 561  | reverse | hypothetical protein CDS             |
| 71 | FD2 | QPB11595.1 | 25741 | 26298 | 558  | forward | hypothetical protein CDS             |
| 72 | FD2 | QPB11582.1 | 17466 | 17999 | 534  | reverse | hypothetical protein CDS             |
| 73 | FD2 | QPB11565.1 | 8647  | 9168  | 522  | reverse | hypothetical protein CDS             |
| 74 | FD2 | QPB11576.1 | 14686 | 15156 | 471  | reverse | hypothetical protein CDS             |
| 75 | FD2 | QPB11557.1 | 2709  | 3170  | 462  | forward | tail length tape-measure protein CDS |
| 76 | FD2 | QPB11597.1 | 27300 | 27761 | 462  | forward | hypothetical protein CDS             |
| 77 | FD2 | QPB11591.1 | 21594 | 22031 | 438  | forward | hypothetical protein CDS             |
| 78 | FD2 | QPB11583.1 | 18230 | 18646 | 417  | forward | hypothetical protein CDS             |
| 79 | FD2 | QPB11577.1 | 15195 | 15605 | 411  | reverse | hypothetical protein CDS             |
| 80 | FD2 | QPB11564.1 | 8161  | 8562  | 402  | forward | putative holin CDS                   |
| 81 | FD2 | QPB11566.1 | 9173  | 9565  | 393  | reverse | hypothetical protein CDS             |
| 82 | FD2 | QPB11600.1 | 28404 | 28775 | 372  | forward | hypothetical protein CDS             |
| 83 | FD2 | QPB11579.1 | 16549 | 16908 | 360  | reverse | hypothetical protein CDS             |
| 84 | FD2 | QPB11574.1 | 13426 | 13782 | 357  | reverse | hypothetical protein CDS             |
| 85 | FD2 | QPB11598.1 | 27763 | 28110 | 348  | forward | hypothetical protein CDS             |
| 86 | FD2 | QPB11568.1 | 9853  | 10173 | 321  | reverse | hypothetical protein CDS             |
| 87 | FD2 | QPB11552.1 | 387   | 692   | 306  | reverse | hypothetical protein CDS             |
| 88 | FD2 | QPB11555.1 | 1952  | 2242  | 291  | reverse | hypothetical protein CDS             |
| 89 | FD2 | QPB11599.1 | 28117 | 28407 | 291  | forward | hypothetical protein CDS             |
| 90 | FD2 | QPB11556.1 | 2432  | 2710  | 279  | reverse | hypothetical protein CDS             |
| 91 | FD2 | QPB11567.1 | 9569  | 9835  | 267  | reverse | hypothetical protein CDS             |
| 92 | FD2 | QPB11561.1 | 6177  | 6440  | 264  | forward | hypothetical protein CDS             |
| 93 | FD2 | QPB11585.1 | 18871 | 19119 | 249  | forward | hypothetical protein CDS             |
| 94 | FD2 | QPB11586.1 | 19270 | 19503 | 234  | reverse | hypothetical protein CDS             |



|     |     |            |       |       |      |         |                                      |
|-----|-----|------------|-------|-------|------|---------|--------------------------------------|
| 95  | FD2 | QPB11581.1 | 17215 | 17442 | 228  | reverse | hypothetical protein CDS             |
| 96  | FD2 | QPB11584.1 | 18650 | 18871 | 222  | forward | hypothetical protein CDS             |
| 97  | FD2 | QPB11553.1 | 878   | 1081  | 204  | reverse | hypothetical protein CDS             |
| 98  | FD2 | QPB11580.1 | 17015 | 17218 | 204  | reverse | hypothetical protein CDS             |
| 99  | FD2 | QPB11588.1 | 20952 | 21152 | 201  | reverse | hypothetical protein CDS             |
| 100 | FD2 | QPB11570.1 | 11215 | 11409 | 195  | reverse | hypothetical protein CDS             |
| 101 | FD2 | QPB11587.1 | 19738 | 19932 | 195  | reverse | hypothetical protein CDS             |
| 102 | FD2 | QPB11589.1 | 21247 | 21426 | 180  | reverse | hypothetical protein CDS             |
| 103 | FD2 | QPB11551.1 | 224   | 397   | 174  | forward | hypothetical protein CDS             |
| 104 | FD2 | QPB11590.1 | 21430 | 21573 | 144  | reverse | hypothetical protein CDS             |
| 105 | FD3 | QPB11641.1 | 21906 | 23417 | 1512 | forward | hypothetical protein CDS             |
| 106 | FD3 | QPB11642.1 | 23414 | 24739 | 1326 | forward | hypothetical protein CDS             |
| 107 | FD3 | QPB11610.1 | 4133  | 5293  | 1161 | forward | hypothetical protein CDS             |
| 108 | FD3 | QPB11626.1 | 13597 | 14664 | 1068 | reverse | hypothetical protein CDS             |
| 109 | FD3 | QPB11620.1 | 10185 | 11231 | 1047 | reverse | hypothetical protein CDS             |
| 110 | FD3 | QPB11609.1 | 3151  | 4128  | 978  | forward | hypothetical protein CDS             |
| 111 | FD3 | QPB11646.1 | 26162 | 27112 | 951  | forward | hypothetical protein CDS             |
| 112 | FD3 | QPB11629.1 | 15622 | 16563 | 942  | reverse | exonuclease CDS                      |
| 113 | FD3 | QPB11611.1 | 5313  | 6131  | 819  | forward | hypothetical protein CDS             |
| 114 | FD3 | QPB11614.1 | 7347  | 8153  | 807  | forward | hypothetical protein CDS             |
| 115 | FD3 | QPB11613.1 | 6446  | 7243  | 798  | forward | hypothetical protein CDS             |
| 116 | FD3 | QPB11643.1 | 24746 | 25501 | 756  | forward | hypothetical protein CDS             |
| 117 | FD3 | QPB11624.1 | 12576 | 13247 | 672  | reverse | DNA primase CDS                      |
| 118 | FD3 | QPB11651.1 | 28683 | 29324 | 642  | forward | major tail protein CDS               |
| 119 | FD3 | QPB11623.1 | 11966 | 12529 | 564  | reverse | hypothetical protein CDS             |
| 120 | FD3 | QPB11622.1 | 11409 | 11969 | 561  | reverse | hypothetical protein CDS             |
| 121 | FD3 | QPB11645.1 | 25604 | 26158 | 555  | forward | hypothetical protein CDS             |
| 122 | FD3 | QPB11633.1 | 17483 | 18022 | 540  | reverse | hypothetical protein CDS             |
| 123 | FD3 | QPB11616.1 | 8647  | 9168  | 522  | reverse | hypothetical protein CDS             |
| 124 | FD3 | QPB11607.1 | 2321  | 2809  | 489  | reverse | hypothetical protein CDS             |
| 125 | FD3 | QPB11647.1 | 27129 | 27617 | 489  | forward | hypothetical protein CDS             |
| 126 | FD3 | QPB11627.1 | 14705 | 15169 | 465  | reverse | hypothetical protein CDS             |
| 127 | FD3 | QPB11615.1 | 8157  | 8561  | 405  | forward | putative holin CDS                   |
| 128 | FD3 | QPB11628.1 | 15221 | 15625 | 405  | reverse | hypothetical protein CDS             |
| 129 | FD3 | QPB11617.1 | 9174  | 9566  | 393  | reverse | hypothetical protein CDS             |
| 130 | FD3 | QPB11648.1 | 27592 | 27966 | 375  | forward | hypothetical protein CDS             |
| 131 | FD3 | QPB11650.1 | 28260 | 28631 | 372  | forward | hypothetical protein CDS             |
| 132 | FD3 | QPB11608.1 | 2808  | 3170  | 363  | forward | tail length tape-measure protein CDS |
| 133 | FD3 | QPB11636.1 | 18729 | 19085 | 357  | forward | hypothetical protein CDS             |
| 134 | FD3 | QPB11640.1 | 21553 | 21906 | 354  | forward | hypothetical protein CDS             |
| 135 | FD3 | QPB11630.1 | 16563 | 16904 | 342  | reverse | hypothetical protein CDS             |
| 136 | FD3 | QPB11619.1 | 9854  | 10174 | 321  | reverse | hypothetical protein CDS             |
| 137 | FD3 | QPB11602.1 | 387   | 692   | 306  | reverse | hypothetical protein CDS             |
| 138 | FD3 | QPB11639.1 | 21169 | 21471 | 303  | forward | hypothetical protein CDS             |
| 139 | FD3 | QPB11649.1 | 27973 | 28263 | 291  | forward | hypothetical protein CDS             |
| 140 | FD3 | QPB11635.1 | 18292 | 18579 | 288  | forward | hypothetical protein CDS             |
| 141 | FD3 | QPB11612.1 | 6177  | 6443  | 267  | forward | hypothetical protein CDS             |
| 142 | FD3 | QPB11618.1 | 9570  | 9836  | 267  | reverse | hypothetical protein CDS             |
| 143 | FD3 | QPB11605.1 | 1721  | 1972  | 252  | reverse | hypothetical protein CDS             |
| 144 | FD3 | QPB11606.1 | 2003  | 2251  | 249  | reverse | hypothetical protein CDS             |
| 145 | FD3 | QPB11638.1 | 19651 | 19896 | 246  | reverse | hypothetical protein CDS             |
| 146 | FD3 | QPB11632.1 | 17230 | 17460 | 231  | reverse | hypothetical protein CDS             |
| 147 | FD3 | QPB11631.1 | 17028 | 17237 | 210  | reverse | hypothetical protein CDS             |

|     |        |            |       |       |      |         |                          |
|-----|--------|------------|-------|-------|------|---------|--------------------------|
| 148 | FD3    | QPB11621.1 | 11228 | 11425 | 198  | reverse | hypothetical protein CDS |
| 149 | FD3    | QPB11625.1 | 13282 | 13470 | 189  | forward | hypothetical protein CDS |
| 150 | FD3    | QPB11603.1 | 878   | 1054  | 177  | reverse | hypothetical protein CDS |
| 151 | FD3    | QPB11634.1 | 18132 | 18302 | 171  | forward | hypothetical protein CDS |
| 152 | FD3    | QPB11604.1 | 1280  | 1447  | 168  | reverse | hypothetical protein CDS |
| 153 | FD3    | QPB11644.1 | 25498 | 25623 | 126  | forward | hypothetical protein CDS |
| 154 | FD3    | QPB11637.1 | 19100 | 19201 | 102  | forward | hypothetical protein CDS |
| 155 | PAVL20 | QPB11653.1 | 405   | 3170  | 2766 | forward | hypothetical protein CDS |
| 156 | PAVL20 | QPB11688.1 | 22068 | 23579 | 1512 | forward | hypothetical protein CDS |
| 157 | PAVL20 | QPB11689.1 | 23576 | 24901 | 1326 | forward | hypothetical protein CDS |
| 158 | PAVL20 | QPB11655.1 | 4134  | 5297  | 1164 | forward | hypothetical protein CDS |
| 159 | PAVL20 | QPB11665.1 | 10181 | 11218 | 1038 | reverse | hypothetical protein CDS |
| 160 | PAVL20 | QPB11654.1 | 3186  | 4133  | 948  | forward | hypothetical protein CDS |
| 161 | PAVL20 | QPB11675.1 | 15602 | 16549 | 948  | reverse | exonuclease CDS          |
| 162 | PAVL20 | QPB11693.1 | 26337 | 27284 | 948  | forward | hypothetical protein CDS |
| 163 | PAVL20 | QPB11659.1 | 7291  | 8148  | 858  | forward | hypothetical protein CDS |
| 164 | PAVL20 | QPB11656.1 | 5317  | 6135  | 819  | forward | hypothetical protein CDS |
| 165 | PAVL20 | QPB11658.1 | 6443  | 7249  | 807  | forward | hypothetical protein CDS |
| 166 | PAVL20 | QPB11690.1 | 24908 | 25663 | 756  | forward | hypothetical protein CDS |
| 167 | PAVL20 | QPB11671.1 | 13782 | 14522 | 741  | reverse | hypothetical protein CDS |
| 168 | PAVL20 | QPB11669.1 | 12557 | 13228 | 672  | reverse | DNA primase CDS          |
| 169 | PAVL20 | QPB11698.1 | 28858 | 29457 | 600  | forward | hypothetical protein CDS |
| 170 | PAVL20 | QPB11668.1 | 11950 | 12513 | 564  | reverse | hypothetical protein CDS |
| 171 | PAVL20 | QPB11667.1 | 11393 | 11953 | 561  | reverse | hypothetical protein CDS |
| 172 | PAVL20 | QPB11679.1 | 17466 | 17999 | 534  | reverse | hypothetical protein CDS |
| 173 | PAVL20 | QPB11661.1 | 8647  | 9168  | 522  | reverse | hypothetical protein CDS |
| 174 | PAVL20 | QPB11692.1 | 25854 | 26330 | 477  | forward | hypothetical protein CDS |
| 175 | PAVL20 | QPB11694.1 | 27331 | 27792 | 462  | forward | hypothetical protein CDS |
| 176 | PAVL20 | QPB11680.1 | 18230 | 18646 | 417  | forward | hypothetical protein CDS |
| 177 | PAVL20 | QPB11674.1 | 15195 | 15605 | 411  | reverse | hypothetical protein CDS |
| 178 | PAVL20 | QPB11662.1 | 9173  | 9565  | 393  | reverse | hypothetical protein CDS |
| 179 | PAVL20 | QPB11687.1 | 21692 | 22063 | 372  | forward | hypothetical protein CDS |
| 180 | PAVL20 | QPB11697.1 | 28435 | 28806 | 372  | forward | hypothetical protein CDS |
| 181 | PAVL20 | QPB11676.1 | 16549 | 16908 | 360  | reverse | hypothetical protein CDS |
| 182 | PAVL20 | QPB11670.1 | 13426 | 13782 | 357  | reverse | hypothetical protein CDS |
| 183 | PAVL20 | QPB11695.1 | 27794 | 28141 | 348  | forward | hypothetical protein CDS |
| 184 | PAVL20 | QPB11664.1 | 9853  | 10173 | 321  | reverse | hypothetical protein CDS |
| 185 | PAVL20 | QPB11686.1 | 21295 | 21600 | 306  | forward | hypothetical protein CDS |
| 186 | PAVL20 | QPB11696.1 | 28148 | 28438 | 291  | forward | hypothetical protein CDS |
| 187 | PAVL20 | QPB11660.1 | 8281  | 8562  | 282  | forward | putative holin CDS       |
| 188 | PAVL20 | QPB11663.1 | 9569  | 9835  | 267  | reverse | hypothetical protein CDS |
| 189 | PAVL20 | QPB11657.1 | 6177  | 6440  | 264  | forward | hypothetical protein CDS |
| 190 | PAVL20 | QPB11682.1 | 18868 | 19119 | 252  | forward | hypothetical protein CDS |
| 191 | PAVL20 | QPB11683.1 | 19270 | 19503 | 234  | reverse | hypothetical protein CDS |
| 192 | PAVL20 | QPB11672.1 | 14580 | 14807 | 228  | forward | hypothetical protein CDS |
| 193 | PAVL20 | QPB11678.1 | 17215 | 17442 | 228  | reverse | hypothetical protein CDS |
| 194 | PAVL20 | QPB11681.1 | 18650 | 18871 | 222  | forward | hypothetical protein CDS |
| 195 | PAVL20 | QPB11677.1 | 17015 | 17218 | 204  | reverse | hypothetical protein CDS |
| 196 | PAVL20 | QPB11685.1 | 20952 | 21152 | 201  | reverse | hypothetical protein CDS |
| 197 | PAVL20 | QPB11666.1 | 11215 | 11409 | 195  | reverse | hypothetical protein CDS |
| 198 | PAVL20 | QPB11673.1 | 14819 | 15013 | 195  | forward | hypothetical protein CDS |
| 199 | PAVL20 | QPB11684.1 | 19738 | 19932 | 195  | reverse | hypothetical protein CDS |
| 200 | PAVL20 | QPB11652.1 | 224   | 397   | 174  | forward | hypothetical protein CDS |

|     |        |            |       |       |      |         |                                      |
|-----|--------|------------|-------|-------|------|---------|--------------------------------------|
| 201 | PAVL20 | QPB11691.1 | 25670 | 25792 | 123  | forward | hypothetical protein CDS             |
| 202 | PAVL21 | QPB11745.1 | 22297 | 23808 | 1512 | forward | hypothetical protein CDS             |
| 203 | PAVL21 | QPB11746.1 | 23805 | 25130 | 1326 | forward | hypothetical protein CDS             |
| 204 | PAVL21 | QPB11705.1 | 4137  | 5297  | 1161 | forward | hypothetical protein CDS             |
| 205 | PAVL21 | QPB11717.1 | 10261 | 11307 | 1047 | reverse | hypothetical protein CDS             |
| 206 | PAVL21 | QPB11703.1 | 2154  | 3170  | 1017 | forward | tail length tape-measure protein CDS |
| 207 | PAVL21 | QPB11704.1 | 3167  | 4132  | 966  | forward | hypothetical protein CDS             |
| 208 | PAVL21 | QPB11750.1 | 26554 | 27501 | 948  | forward | hypothetical protein CDS             |
| 209 | PAVL21 | QPB11706.1 | 5347  | 6135  | 789  | forward | hypothetical protein CDS             |
| 210 | PAVL21 | QPB11747.1 | 25134 | 25892 | 759  | forward | hypothetical protein CDS             |
| 211 | PAVL21 | QPB11702.1 | 1280  | 1972  | 693  | reverse | hypothetical protein CDS             |
| 212 | PAVL21 | QPB11721.1 | 12649 | 13320 | 672  | reverse | DNA primase CDS                      |
| 213 | PAVL21 | QPB11755.1 | 29080 | 29721 | 642  | forward | major tail protein CDS               |
| 214 | PAVL21 | QPB11720.1 | 12039 | 12605 | 567  | reverse | hypothetical protein CDS             |
| 215 | PAVL21 | QPB11719.1 | 11482 | 12042 | 561  | reverse | hypothetical protein CDS             |
| 216 | PAVL21 | QPB11711.1 | 7678  | 8232  | 555  | forward | hypothetical protein CDS             |
| 217 | PAVL21 | QPB11735.1 | 17564 | 18097 | 534  | reverse | hypothetical protein CDS             |
| 218 | PAVL21 | QPB11713.1 | 8733  | 9251  | 519  | reverse | hypothetical protein CDS             |
| 219 | PAVL21 | QPB11708.1 | 6455  | 6931  | 477  | forward | tail fiber protein CDS               |
| 220 | PAVL21 | QPB11749.1 | 26077 | 26550 | 474  | forward | hypothetical protein CDS             |
| 221 | PAVL21 | QPB11752.1 | 27945 | 28355 | 411  | forward | hypothetical protein CDS             |
| 222 | PAVL21 | QPB11712.1 | 8245  | 8646  | 402  | forward | putative holin CDS                   |
| 223 | PAVL21 | QPB11714.1 | 9256  | 9648  | 393  | reverse | hypothetical protein CDS             |
| 224 | PAVL21 | QPB11728.1 | 15082 | 15474 | 393  | forward | hypothetical protein CDS             |
| 225 | PAVL21 | QPB11731.1 | 16169 | 16561 | 393  | forward | hypothetical protein CDS             |
| 226 | PAVL21 | QPB11709.1 | 6937  | 7320  | 384  | forward | hypothetical protein CDS             |
| 227 | PAVL21 | QPB11744.1 | 21921 | 22292 | 372  | forward | hypothetical protein CDS             |
| 228 | PAVL21 | QPB11754.1 | 28649 | 29020 | 372  | forward | hypothetical protein CDS             |
| 229 | PAVL21 | QPB11722.1 | 13518 | 13874 | 357  | reverse | hypothetical protein CDS             |
| 230 | PAVL21 | QPB11733.1 | 16958 | 17290 | 333  | forward | hypothetical protein CDS             |
| 231 | PAVL21 | QPB11723.1 | 13886 | 14215 | 330  | forward | hypothetical protein CDS             |
| 232 | PAVL21 | QPB11716.1 | 9930  | 10250 | 321  | reverse | hypothetical protein CDS             |
| 233 | PAVL21 | QPB11736.1 | 18192 | 18512 | 321  | forward | hypothetical protein CDS             |
| 234 | PAVL21 | QPB11739.1 | 18947 | 19255 | 309  | reverse | hypothetical protein CDS             |
| 235 | PAVL21 | QPB11753.1 | 28362 | 28652 | 291  | forward | hypothetical protein CDS             |
| 236 | PAVL21 | QPB11743.1 | 21584 | 21868 | 285  | reverse | hypothetical protein CDS             |
| 237 | PAVL21 | QPB11715.1 | 9652  | 9918  | 267  | reverse | hypothetical protein CDS             |
| 238 | PAVL21 | QPB11707.1 | 6180  | 6443  | 264  | forward | hypothetical protein CDS             |
| 239 | PAVL21 | QPB11741.1 | 19969 | 20214 | 246  | reverse | hypothetical protein CDS             |
| 240 | PAVL21 | QPB11742.1 | 21189 | 21431 | 243  | reverse | hypothetical protein CDS             |
| 241 | PAVL21 | QPB11734.1 | 17319 | 17546 | 228  | reverse | hypothetical protein CDS             |
| 242 | PAVL21 | QPB11727.1 | 14676 | 14900 | 225  | forward | hypothetical protein CDS             |
| 243 | PAVL21 | QPB11701.1 | 878   | 1081  | 204  | reverse | hypothetical protein CDS             |
| 244 | PAVL21 | QPB11748.1 | 25889 | 26080 | 192  | forward | hypothetical protein CDS             |
| 245 | PAVL21 | QPB11729.1 | 15699 | 15887 | 189  | forward | hypothetical protein CDS             |
| 246 | PAVL21 | QPB11700.1 | 244   | 429   | 186  | reverse | hypothetical protein CDS             |
| 247 | PAVL21 | QPB11710.1 | 7343  | 7528  | 186  | reverse | hypothetical protein CDS             |
| 248 | PAVL21 | QPB11732.1 | 16591 | 16776 | 186  | forward | hypothetical protein CDS             |
| 249 | PAVL21 | QPB11738.1 | 18747 | 18929 | 183  | forward | hypothetical protein CDS             |
| 250 | PAVL21 | QPB11730.1 | 15984 | 16148 | 165  | forward | hypothetical protein CDS             |
| 251 | PAVL21 | QPB11737.1 | 18582 | 18743 | 162  | forward | hypothetical protein CDS             |
| 252 | PAVL21 | QPB11699.1 | 88    | 234   | 147  | reverse | hypothetical protein CDS             |
| 253 | PAVL21 | QPB11724.1 | 14228 | 14374 | 147  | forward | hypothetical protein CDS             |

|     |        |            |       |       |      |         |                                 |
|-----|--------|------------|-------|-------|------|---------|---------------------------------|
| 254 | PAVL21 | QPB11740.1 | 19481 | 19621 | 141  | reverse | hypothetical protein CDS        |
| 255 | PAVL21 | QPB11751.1 | 27781 | 27900 | 120  | reverse | hypothetical protein CDS        |
| 256 | PAVL21 | QPB11726.1 | 14541 | 14657 | 117  | forward | hypothetical protein CDS        |
| 257 | PAVL21 | QPB11718.1 | 11368 | 11466 | 99   | forward | hypothetical protein CDS        |
| 258 | PAVL21 | QPB11725.1 | 14445 | 14537 | 93   | forward | hypothetical protein CDS        |
| 259 | PAVL33 | QPB11808.1 | 405   | 3170  | 2766 | forward | hypothetical protein CDS        |
| 260 | PAVL33 | QPB11850.1 | 21822 | 23333 | 1512 | forward | hypothetical protein CDS        |
| 261 | PAVL33 | QPB11851.1 | 23330 | 24649 | 1320 | forward | capsid and scaffold protein CDS |
| 262 | PAVL33 | QPB11810.1 | 4135  | 5292  | 1158 | forward | hypothetical protein CDS        |
| 263 | PAVL33 | QPB11833.1 | 15291 | 16349 | 1059 | reverse | exonuclease CDS                 |
| 264 | PAVL33 | QPB11855.1 | 26050 | 27021 | 972  | forward | major capsid protein CDS        |
| 265 | PAVL33 | QPB11809.1 | 3186  | 4127  | 942  | forward | hypothetical protein CDS        |
| 266 | PAVL33 | QPB11813.1 | 7323  | 8186  | 864  | forward | hypothetical protein CDS        |
| 267 | PAVL33 | QPB11811.1 | 5313  | 6131  | 819  | forward | hypothetical protein CDS        |
| 268 | PAVL33 | QPB11812.1 | 6456  | 7271  | 816  | forward | hypothetical protein CDS        |
| 269 | PAVL33 | QPB11852.1 | 24646 | 25410 | 765  | forward | hypothetical protein CDS        |
| 270 | PAVL33 | QPB11826.1 | 12341 | 13012 | 672  | reverse | DNA primase CDS                 |
| 271 | PAVL33 | QPB11860.1 | 28592 | 29221 | 630  | forward | hypothetical protein CDS        |
| 272 | PAVL33 | QPB11854.1 | 25519 | 26043 | 525  | forward | hypothetical protein CDS        |
| 273 | PAVL33 | QPB11815.1 | 8690  | 9211  | 522  | reverse | hypothetical protein CDS        |
| 274 | PAVL33 | QPB11856.1 | 27065 | 27526 | 462  | forward | hypothetical protein CDS        |
| 275 | PAVL33 | QPB11818.1 | 10138 | 10584 | 447  | forward | hypothetical protein CDS        |
| 276 | PAVL33 | QPB11814.1 | 8199  | 8603  | 405  | forward | putative holin CDS              |
| 277 | PAVL33 | QPB11849.1 | 21416 | 21817 | 402  | forward | hypothetical protein CDS        |
| 278 | PAVL33 | QPB11824.1 | 11707 | 12105 | 399  | forward | hypothetical protein CDS        |
| 279 | PAVL33 | QPB11816.1 | 9217  | 9609  | 393  | reverse | hypothetical protein CDS        |
| 280 | PAVL33 | QPB11859.1 | 28169 | 28540 | 372  | forward | hypothetical protein CDS        |
| 281 | PAVL33 | QPB11834.1 | 16349 | 16708 | 360  | reverse | hypothetical protein CDS        |
| 282 | PAVL33 | QPB11857.1 | 27528 | 27875 | 348  | forward | hypothetical protein CDS        |
| 283 | PAVL33 | QPB11841.1 | 18295 | 18606 | 312  | reverse | hypothetical protein CDS        |
| 284 | PAVL33 | QPB11832.1 | 14779 | 15087 | 309  | forward | hypothetical protein CDS        |
| 285 | PAVL33 | QPB11842.1 | 18638 | 18946 | 309  | reverse | hypothetical protein CDS        |
| 286 | PAVL33 | QPB11848.1 | 21069 | 21374 | 306  | forward | hypothetical protein CDS        |
| 287 | PAVL33 | QPB11844.1 | 19534 | 19824 | 291  | reverse | hypothetical protein CDS        |
| 288 | PAVL33 | QPB11858.1 | 27882 | 28172 | 291  | forward | hypothetical protein CDS        |
| 289 | PAVL33 | QPB11807.1 | 110   | 397   | 288  | forward | hypothetical protein CDS        |
| 290 | PAVL33 | QPB11817.1 | 9613  | 9897  | 285  | reverse | hypothetical protein CDS        |
| 291 | PAVL33 | QPB11828.1 | 13578 | 13847 | 270  | forward | hypothetical protein CDS        |
| 292 | PAVL33 | QPB11846.1 | 20438 | 20683 | 246  | reverse | hypothetical protein CDS        |
| 293 | PAVL33 | QPB11831.1 | 14361 | 14597 | 237  | forward | hypothetical protein CDS        |
| 294 | PAVL33 | QPB11819.1 | 10606 | 10836 | 231  | forward | hypothetical protein CDS        |
| 295 | PAVL33 | QPB11836.1 | 17011 | 17238 | 228  | reverse | hypothetical protein CDS        |
| 296 | PAVL33 | QPB11823.1 | 11467 | 11682 | 216  | reverse | hypothetical protein CDS        |
| 297 | PAVL33 | QPB11821.1 | 11141 | 11347 | 207  | forward | hypothetical protein CDS        |
| 298 | PAVL33 | QPB11820.1 | 10873 | 11076 | 204  | forward | hypothetical protein CDS        |
| 299 | PAVL33 | QPB11839.1 | 17527 | 17730 | 204  | forward | hypothetical protein CDS        |
| 300 | PAVL33 | QPB11827.1 | 13210 | 13407 | 198  | reverse | hypothetical protein CDS        |
| 301 | PAVL33 | QPB11847.1 | 20875 | 21072 | 198  | forward | hypothetical protein CDS        |
| 302 | PAVL33 | QPB11840.1 | 17878 | 18063 | 186  | reverse | hypothetical protein CDS        |
| 303 | PAVL33 | QPB11825.1 | 12152 | 12322 | 171  | forward | hypothetical protein CDS        |
| 304 | PAVL33 | QPB11843.1 | 19368 | 19526 | 159  | forward | hypothetical protein CDS        |
| 305 | PAVL33 | QPB11835.1 | 16839 | 16982 | 144  | forward | hypothetical protein CDS        |
| 306 | PAVL33 | QPB11845.1 | 20267 | 20389 | 123  | reverse | hypothetical protein CDS        |

|     |        |            |       |       |      |         |                                 |
|-----|--------|------------|-------|-------|------|---------|---------------------------------|
| 307 | PAVL33 | QPB11838.1 | 17414 | 17530 | 117  | forward | hypothetical protein CDS        |
| 308 | PAVL33 | QPB11853.1 | 25413 | 25526 | 114  | forward | hypothetical protein CDS        |
| 309 | PAVL33 | QPB11822.1 | 11347 | 11451 | 105  | forward | hypothetical protein CDS        |
| 310 | PAVL33 | QPB11829.1 | 13840 | 13944 | 105  | forward | hypothetical protein CDS        |
| 311 | PAVL33 | QPB11837.1 | 17277 | 17381 | 105  | forward | hypothetical protein CDS        |
| 312 | PAVL33 | QPB11830.1 | 14085 | 14180 | 96   | forward | hypothetical protein CDS        |
| 313 | PAVL34 | QPB11757.1 | 405   | 3170  | 2766 | forward | hypothetical protein CDS        |
| 314 | PAVL34 | QPB11796.1 | 21914 | 23425 | 1512 | forward | hypothetical protein CDS        |
| 315 | PAVL34 | QPB11797.1 | 23422 | 24741 | 1320 | forward | capsid and scaffold protein CDS |
| 316 | PAVL34 | QPB11759.1 | 4135  | 5292  | 1158 | forward | hypothetical protein CDS        |
| 317 | PAVL34 | QPB11801.1 | 26142 | 27113 | 972  | forward | major capsid protein CDS        |
| 318 | PAVL34 | QPB11779.1 | 13552 | 14505 | 954  | reverse | hypothetical protein CDS        |
| 319 | PAVL34 | QPB11758.1 | 3186  | 4127  | 942  | forward | hypothetical protein CDS        |
| 320 | PAVL34 | QPB11782.1 | 15469 | 16410 | 942  | reverse | exonuclease CDS                 |
| 321 | PAVL34 | QPB11760.1 | 5313  | 6131  | 819  | forward | hypothetical protein CDS        |
| 322 | PAVL34 | QPB11764.1 | 7447  | 8262  | 816  | forward | hypothetical protein CDS        |
| 323 | PAVL34 | QPB11798.1 | 24738 | 25502 | 765  | forward | hypothetical protein CDS        |
| 324 | PAVL34 | QPB11777.1 | 12417 | 13088 | 672  | reverse | DNA primase CDS                 |
| 325 | PAVL34 | QPB11806.1 | 28684 | 29313 | 630  | forward | hypothetical protein CDS        |
| 326 | PAVL34 | QPB11786.1 | 17322 | 17855 | 534  | reverse | hypothetical protein CDS        |
| 327 | PAVL34 | QPB11800.1 | 25611 | 26135 | 525  | forward | hypothetical protein CDS        |
| 328 | PAVL34 | QPB11766.1 | 8766  | 9287  | 522  | reverse | hypothetical protein CDS        |
| 329 | PAVL34 | QPB11762.1 | 6455  | 6949  | 495  | forward | tail fiber protein CDS          |
| 330 | PAVL34 | QPB11780.1 | 14552 | 15022 | 471  | reverse | hypothetical protein CDS        |
| 331 | PAVL34 | QPB11802.1 | 27157 | 27618 | 462  | forward | hypothetical protein CDS        |
| 332 | PAVL34 | QPB11769.1 | 10211 | 10660 | 450  | forward | hypothetical protein CDS        |
| 333 | PAVL34 | QPB11795.1 | 21469 | 21909 | 441  | forward | hypothetical protein CDS        |
| 334 | PAVL34 | QPB11765.1 | 8275  | 8679  | 405  | forward | putative holin CDS              |
| 335 | PAVL34 | QPB11781.1 | 15068 | 15472 | 405  | reverse | hypothetical protein CDS        |
| 336 | PAVL34 | QPB11763.1 | 6946  | 7347  | 402  | forward | tail fiber protein CDS          |
| 337 | PAVL34 | QPB11775.1 | 11783 | 12181 | 399  | forward | hypothetical protein CDS        |
| 338 | PAVL34 | QPB11767.1 | 9293  | 9685  | 393  | reverse | hypothetical protein CDS        |
| 339 | PAVL34 | QPB11805.1 | 28261 | 28632 | 372  | forward | hypothetical protein CDS        |
| 340 | PAVL34 | QPB11783.1 | 16410 | 16769 | 360  | reverse | hypothetical protein CDS        |
| 341 | PAVL34 | QPB11788.1 | 18353 | 18664 | 312  | reverse | hypothetical protein CDS        |
| 342 | PAVL34 | QPB11794.1 | 21170 | 21475 | 306  | forward | hypothetical protein CDS        |
| 343 | PAVL34 | QPB11789.1 | 18681 | 18980 | 300  | forward | hypothetical protein CDS        |
| 344 | PAVL34 | QPB11804.1 | 27974 | 28264 | 291  | forward | hypothetical protein CDS        |
| 345 | PAVL34 | QPB11756.1 | 110   | 397   | 288  | forward | hypothetical protein CDS        |
| 346 | PAVL34 | QPB11768.1 | 9689  | 9973  | 285  | reverse | hypothetical protein CDS        |
| 347 | PAVL34 | QPB11761.1 | 6188  | 6451  | 264  | forward | hypothetical protein CDS        |
| 348 | PAVL34 | QPB11791.1 | 19686 | 19931 | 246  | reverse | hypothetical protein CDS        |
| 349 | PAVL34 | QPB11792.1 | 20539 | 20784 | 246  | reverse | hypothetical protein CDS        |
| 350 | PAVL34 | QPB11770.1 | 10682 | 10912 | 231  | forward | hypothetical protein CDS        |
| 351 | PAVL34 | QPB11785.1 | 17072 | 17299 | 228  | reverse | hypothetical protein CDS        |
| 352 | PAVL34 | QPB11774.1 | 11543 | 11758 | 216  | reverse | hypothetical protein CDS        |
| 353 | PAVL34 | QPB11772.1 | 11217 | 11423 | 207  | forward | hypothetical protein CDS        |
| 354 | PAVL34 | QPB11771.1 | 10949 | 11152 | 204  | forward | hypothetical protein CDS        |
| 355 | PAVL34 | QPB11784.1 | 16875 | 17075 | 201  | reverse | hypothetical protein CDS        |
| 356 | PAVL34 | QPB11778.1 | 13286 | 13483 | 198  | reverse | hypothetical protein CDS        |
| 357 | PAVL34 | QPB11793.1 | 20976 | 21173 | 198  | forward | hypothetical protein CDS        |
| 358 | PAVL34 | QPB11787.1 | 18101 | 18268 | 168  | forward | hypothetical protein CDS        |
| 359 | PAVL34 | QPB11790.1 | 19408 | 19566 | 159  | forward | hypothetical protein CDS        |

|     |        |            |       |       |      |         |                          |
|-----|--------|------------|-------|-------|------|---------|--------------------------|
| 360 | PAVL34 | QPB11803.1 | 27809 | 27967 | 159  | forward | hypothetical protein CDS |
| 361 | PAVL34 | QPB11776.1 | 12246 | 12398 | 153  | forward | hypothetical protein CDS |
| 362 | PAVL34 | QPB11799.1 | 25505 | 25618 | 114  | forward | hypothetical protein CDS |
| 363 | PAVL34 | QPB11773.1 | 11423 | 11527 | 105  | forward | hypothetical protein CDS |
| 364 | PAVL45 | QPB11862.1 | 405   | 3170  | 2766 | forward | hypothetical protein CDS |
| 365 | PAVL45 | QPB11899.1 | 22040 | 23551 | 1512 | forward | hypothetical protein CDS |
| 366 | PAVL45 | QPB11900.1 | 23548 | 24873 | 1326 | forward | hypothetical protein CDS |
| 367 | PAVL45 | QPB11864.1 | 4134  | 5297  | 1164 | forward | hypothetical protein CDS |
| 368 | PAVL45 | QPB11875.1 | 10181 | 11218 | 1038 | reverse | hypothetical protein CDS |
| 369 | PAVL45 | QPB11863.1 | 3186  | 4133  | 948  | forward | hypothetical protein CDS |
| 370 | PAVL45 | QPB11885.1 | 15602 | 16549 | 948  | reverse | exonuclease CDS          |
| 371 | PAVL45 | QPB11904.1 | 26309 | 27256 | 948  | forward | hypothetical protein CDS |
| 372 | PAVL45 | QPB11865.1 | 5317  | 6135  | 819  | forward | hypothetical protein CDS |
| 373 | PAVL45 | QPB11867.1 | 6443  | 7249  | 807  | forward | hypothetical protein CDS |
| 374 | PAVL45 | QPB11901.1 | 24880 | 25635 | 756  | forward | hypothetical protein CDS |
| 375 | PAVL45 | QPB11881.1 | 13782 | 14522 | 741  | reverse | hypothetical protein CDS |
| 376 | PAVL45 | QPB11879.1 | 12557 | 13228 | 672  | reverse | DNA primase CDS          |
| 377 | PAVL45 | QPB11868.1 | 7495  | 8148  | 654  | forward | hypothetical protein CDS |
| 378 | PAVL45 | QPB11909.1 | 28830 | 29429 | 600  | forward | hypothetical protein CDS |
| 379 | PAVL45 | QPB11878.1 | 11950 | 12513 | 564  | reverse | hypothetical protein CDS |
| 380 | PAVL45 | QPB11877.1 | 11393 | 11953 | 561  | reverse | hypothetical protein CDS |
| 381 | PAVL45 | QPB11889.1 | 17466 | 17999 | 534  | reverse | hypothetical protein CDS |
| 382 | PAVL45 | QPB11871.1 | 8647  | 9168  | 522  | reverse | hypothetical protein CDS |
| 383 | PAVL45 | QPB11905.1 | 27300 | 27764 | 465  | forward | hypothetical protein CDS |
| 384 | PAVL45 | QPB11903.1 | 25874 | 26302 | 429  | forward | hypothetical protein CDS |
| 385 | PAVL45 | QPB11890.1 | 18230 | 18646 | 417  | forward | hypothetical protein CDS |
| 386 | PAVL45 | QPB11884.1 | 15195 | 15605 | 411  | reverse | hypothetical protein CDS |
| 387 | PAVL45 | QPB11872.1 | 9173  | 9565  | 393  | reverse | hypothetical protein CDS |
| 388 | PAVL45 | QPB11898.1 | 21664 | 22035 | 372  | forward | hypothetical protein CDS |
| 389 | PAVL45 | QPB11908.1 | 28407 | 28778 | 372  | forward | hypothetical protein CDS |
| 390 | PAVL45 | QPB11886.1 | 16549 | 16908 | 360  | reverse | hypothetical protein CDS |
| 391 | PAVL45 | QPB11880.1 | 13426 | 13782 | 357  | reverse | hypothetical protein CDS |
| 392 | PAVL45 | QPB11906.1 | 27766 | 28113 | 348  | forward | hypothetical protein CDS |
| 393 | PAVL45 | QPB11874.1 | 9853  | 10173 | 321  | reverse | hypothetical protein CDS |
| 394 | PAVL45 | QPB11897.1 | 21295 | 21600 | 306  | forward | hypothetical protein CDS |
| 395 | PAVL45 | QPB11907.1 | 28120 | 28410 | 291  | forward | hypothetical protein CDS |
| 396 | PAVL45 | QPB11873.1 | 9569  | 9835  | 267  | reverse | hypothetical protein CDS |
| 397 | PAVL45 | QPB11866.1 | 6177  | 6440  | 264  | forward | hypothetical protein CDS |
| 398 | PAVL45 | QPB11892.1 | 18871 | 19119 | 249  | forward | hypothetical protein CDS |
| 399 | PAVL45 | QPB11894.1 | 19270 | 19503 | 234  | reverse | hypothetical protein CDS |
| 400 | PAVL45 | QPB11882.1 | 14580 | 14807 | 228  | forward | hypothetical protein CDS |
| 401 | PAVL45 | QPB11888.1 | 17215 | 17442 | 228  | reverse | hypothetical protein CDS |
| 402 | PAVL45 | QPB11891.1 | 18650 | 18871 | 222  | forward | hypothetical protein CDS |
| 403 | PAVL45 | QPB11887.1 | 17015 | 17218 | 204  | reverse | hypothetical protein CDS |
| 404 | PAVL45 | QPB11896.1 | 20952 | 21152 | 201  | reverse | hypothetical protein CDS |
| 405 | PAVL45 | QPB11876.1 | 11215 | 11409 | 195  | reverse | hypothetical protein CDS |
| 406 | PAVL45 | QPB11883.1 | 14819 | 15013 | 195  | forward | hypothetical protein CDS |
| 407 | PAVL45 | QPB11895.1 | 19738 | 19932 | 195  | reverse | hypothetical protein CDS |
| 408 | PAVL45 | QPB11902.1 | 25667 | 25858 | 192  | reverse | hypothetical protein CDS |
| 409 | PAVL45 | QPB11861.1 | 224   | 397   | 174  | forward | hypothetical protein CDS |
| 410 | PAVL45 | QPB11869.1 | 8214  | 8384  | 171  | reverse | hypothetical protein CDS |
| 411 | PAVL45 | QPB11870.1 | 8428  | 8562  | 135  | forward | putative holin CDS       |
| 412 | PAVL45 | QPB11893.1 | 19141 | 19245 | 105  | forward | hypothetical protein CDS |

**Table S3.**

Phage and antibiotic sensitivity profiles of the clinical *C. acnes* isolates. S – Susceptible, I – Intermediate, R – Resistant.

**Table S3.**

| Index | Isolate number | Fd1 | Fd2 | Fd3 | PAVL20 | PAVL21 | PAVL33 | PAVL34 | PAVL45 | Erythromycin | Clindamycin | Tetracycline | Doxycycline | Minocycline | Bacterial strain     | SLST Type <sup>26</sup> | Phage isolated from sample? |
|-------|----------------|-----|-----|-----|--------|--------|--------|--------|--------|--------------|-------------|--------------|-------------|-------------|----------------------|-------------------------|-----------------------------|
| 1     | 3              | R   | R   | R   | R      | R      | R      | R      | R      | S            | S           | S            | S           | S           | <i>C. avidium</i>    | N/A                     | No                          |
| 2     | 4              | R   | R   | R   | R      | R      | R      | R      | R      | S            | S           | S            | S           | S           | <i>C. acnes</i>      | C1                      | No                          |
| 3     | 20             | R   | R   | R   | R      | R      | R      | R      | R      | S            | S           | S            | S           | S           | <i>C. avidium</i>    | N/A                     | Yes                         |
| 4     | 21             | R   | R   | R   | R      | R      | R      | R      | R      | S            | S           | S            | S           | S           | <i>C. acnes</i>      | A1                      | Yes                         |
| 5     | 33             | R   | R   | R   | R      | R      | R      | R      | R      | S            | S           | S            | S           | S           | <i>C. acnes</i>      | H1                      | Yes                         |
| 6     | 34             | R   | R   | R   | R      | R      | R      | R      | R      | S            | S           | S            | S           | S           | <i>C. avidium</i>    | N/A                     | Yes                         |
| 7     | 39             | R   | R   | R   | R      | R      | R      | R      | R      | S            | S           | S            | S           | S           | <i>C. granulolum</i> | N/A                     | No                          |
| 8     | 45             | R   | R   | R   | R      | R      | R      | R      | R      | S            | S           | S            | S           | S           | <i>C. avidium</i>    | N/A                     | Yes                         |
| 9     | 48             | R   | R   | R   | R      | R      | R      | R      | R      | S            | S           | S            | S           | S           | <i>C. acnes</i>      | Unkown                  | No                          |
| 10    | 14             | S   | S   | S   | S      | S      | S      | S      | S      | R            | R           | R            | R           | R           | <i>C. acnes</i>      | D1                      | No                          |
| 11    | 35             | S   | S   | S   | S      | S      | S      | S      | S      | R            | R           | R            | R           | R           | <i>C. acnes</i>      | A1                      | No                          |
| 12    | 5              | S   | S   | S   | S      | S      | S      | S      | S      | R            | R           | R            | R           | S           | <i>C. acnes</i>      | A1                      | No                          |
| 13    | 2              | S   | S   | S   | S      | S      | S      | S      | S      | R            | R           | I            | R           | I           | <i>C. acnes</i>      | A1                      | No                          |
| 14    | 31             | S   | S   | S   | S      | S      | S      | S      | S      | R            | R           | I            | R           | I           | <i>C. acnes</i>      | Unkown                  | No                          |
| 15    | 42             | S   | S   | S   | S      | S      | S      | S      | S      | R            | R           | I            | R           | I           | <i>C. avidium</i>    | N/A                     | No                          |
| 16    | 28             | S   | S   | S   | S      | S      | S      | S      | S      | R            | R           | I            | R           | S           | <i>C. acnes</i>      | A1                      | No                          |
| 17    | 25             | S   | S   | S   | S      | S      | S      | S      | S      | R            | I           | I            | R           | I           | <i>C. acnes</i>      | A1                      | No                          |
| 18    | 7              | S   | S   | S   | S      | S      | S      | S      | S      | R            | I           | I            | I           | S           | <i>C. acnes</i>      | C1                      | No                          |
| 19    | 24             | S   | S   | S   | S      | S      | S      | S      | S      | R            | I           | S            | S           | S           | <i>C. acnes</i>      | Unkown                  | No                          |
| 20    | 10             | S   | S   | S   | S      | S      | S      | S      | S      | S            | S           | S            | S           | R           | <i>C. acnes</i>      | A1                      | No                          |
| 21    | 23             | S   | S   | S   | S      | S      | S      | S      | S      | S            | S           | S            | S           | R           | <i>C. acnes</i>      | A1                      | No                          |
| 22    | 13             | S   | S   | S   | S      | S      | S      | S      | S      | S            | S           | I            | S           | S           | <i>C. acnes</i>      | C1                      | No                          |
| 23    | 19             | S   | S   | S   | S      | S      | S      | S      | S      | S            | S           | S            | I           | S           | <i>C. acnes</i>      | Unkown                  | No                          |
| 24    | 1              | S   | S   | S   | S      | S      | S      | S      | S      | S            | S           | S            | S           | S           | <i>C. acnes</i>      | A1                      | No                          |
| 25    | 6              | S   | S   | S   | S      | S      | S      | S      | S      | S            | S           | S            | S           | S           | <i>C. acnes</i>      | A1                      | No                          |
| 26    | 8              | S   | S   | S   | S      | S      | S      | S      | S      | S            | S           | S            | S           | S           | <i>C. acnes</i>      | C1                      | No                          |
| 27    | 9              | S   | S   | S   | S      | S      | S      | S      | S      | S            | S           | S            | S           | S           | <i>C. acnes</i>      | C2                      | No                          |
| 28    | 11             | S   | S   | S   | S      | S      | S      | S      | S      | S            | S           | S            | S           | S           | <i>C. acnes</i>      | A1                      | No                          |
| 29    | 15             | S   | S   | S   | S      | S      | S      | S      | S      | S            | S           | S            | S           | S           | <i>C. acnes</i>      | F4                      | No                          |
| 30    | 16             | S   | S   | S   | S      | S      | S      | S      | S      | S            | S           | S            | S           | S           | <i>C. avidium</i>    | N/A                     | No                          |
| 31    | 18             | S   | S   | S   | S      | S      | S      | S      | S      | S            | S           | S            | S           | S           | <i>C. acnes</i>      | A1                      | No                          |
| 32    | 22             | S   | S   | S   | S      | S      | S      | S      | S      | S            | S           | S            | S           | S           | <i>C. acnes</i>      | A1                      | No                          |
| 33    | 27             | S   | S   | S   | S      | S      | S      | S      | S      | S            | S           | S            | S           | S           | <i>C. acnes</i>      | H1                      | No                          |
| 34    | 30             | S   | S   | S   | S      | S      | S      | S      | S      | S            | S           | S            | S           | S           | <i>C. acnes</i>      | D1                      | No                          |
| 35    | 32             | S   | S   | S   | S      | S      | S      | S      | S      | S            | S           | S            | S           | S           | <i>C. acnes</i>      | Unkown                  | No                          |
| 36    | 36             | S   | S   | S   | S      | S      | S      | S      | S      | S            | S           | S            | S           | S           | <i>C. acnes</i>      | A1                      | No                          |
| 37    | 37             | S   | S   | S   | S      | S      | S      | S      | S      | S            | S           | S            | S           | S           | <i>C. acnes</i>      | A1                      | No                          |
| 38    | 40             | S   | S   | S   | S      | S      | S      | S      | S      | S            | S           | S            | S           | S           | <i>C. acnes</i>      | Unkown                  | No                          |
| 39    | 41             | S   | S   | S   | S      | S      | S      | S      | S      | S            | S           | S            | S           | S           | <i>C. acnes</i>      | A1                      | No                          |
| 40    | 43             | S   | S   | S   | S      | S      | S      | S      | S      | S            | S           | S            | S           | S           | <i>C. acnes</i>      | K1                      | No                          |
| 41    | 44             | S   | S   | S   | S      | S      | S      | S      | S      | S            | S           | S            | S           | S           | <i>C. acnes</i>      | F4                      | No                          |
| 42    | 46             | S   | S   | S   | S      | S      | S      | S      | S      | S            | S           | S            | S           | S           | <i>C. avidium</i>    | N/A                     | No                          |
| 43    | 47             | S   | S   | S   | S      | S      | S      | S      | S      | S            | S           | S            | S           | S           | <i>C. acnes</i>      | A1                      | No                          |
| 44    | 49             | S   | S   | S   | S      | S      | S      | S      | S      | S            | S           | S            | S           | S           | <i>C. acnes</i>      | F4                      | No                          |





## Infected-Untreated

|                 | Day 3         |     | Day 4 |   | Day 5 |     | Day 6 |     | Day 7 |     | Day 8 |     | Day 9 |     | Day 10 |     |     |   |
|-----------------|---------------|-----|-------|---|-------|-----|-------|-----|-------|-----|-------|-----|-------|-----|--------|-----|-----|---|
| # Animal :      | 1             |     |       |   |       |     |       |     |       |     |       |     |       |     |        |     |     |   |
|                 |               |     |       |   |       |     |       |     |       |     |       |     |       |     |        |     |     |   |
| Diameter Score  | measured      | L   | R     | L | R     | L   | R     | L   | R     | L   | R     | L   | R     | L   | R      | L   | R   |   |
| Elevation Score | first scorer  | 2   | 2     | 1 | 1     | 2   | 2     | 2   | 2     | 2   | 2     | 2   | 2     | 2   | 1      | 1   | 1   | 2 |
|                 | second scorer | 1   | 1     | 1 | 1     | 1   | 1     | 2   | 2     | 1   | 1     | 1   | 1     | 1   | 1      | 0   | 1   | 1 |
| Escar Score     | first scorer  | 2   | 2     | 1 | 1     | 2   | 1     | 1   | 2     | 1   | 1     | 1   | 1     | 0   | 1      | 0   | 1   | 0 |
|                 | second scorer | 0   | 0     | 0 | 1     | 0   | 0     | 0   | 0     | 0   | 1     | 0   | 0     | 0   | 1      | 0   | 0   | 0 |
| Total Score     | averaged      | 3.5 | 3.5   | 2 | 3     | 3.5 | 3     | 3.5 | 4     | 3   | 4     | 3   | 3.5   | 2.5 | 2.5    | 1   | 3   |   |
| # Animal :      | 2             |     |       |   |       |     |       |     |       |     |       |     |       |     |        |     |     |   |
|                 |               |     |       |   |       |     |       |     |       |     |       |     |       |     |        |     |     |   |
| Diameter Score  | measured      | L   | R     | L | R     | L   | R     | L   | R     | L   | R     | L   | R     | L   | R      | L   | R   |   |
| Elevation Score | first scorer  | 2   | 3     | 2 | 2     | 3   | 2     | 3   | 1     | 3   | 2     | 2   | 1     | 2   | 2      | 1   | 1   | 1 |
|                 | second scorer | 2   | 2     | 2 | 2     | 2   | 2     | 2   | 1     | 2   | 1     | 1   | 1     | 1   | 1      | 1   | 1   | 1 |
| Escar Score     | first scorer  | 2   | 2     | 2 | 2     | 2   | 2     | 2   | 2     | 1   | 1     | 1   | 2     | 1   | 2      | 1   | 2   | 1 |
|                 | second scorer | 0   | 0     | 0 | 0     | 0   | 0     | 0   | 0     | 1   | 0     | 1   | 0     | 1   | 0      | 0   | 0   | 0 |
| Total Score     | averaged      | 4   | 5     | 4 | 4     | 5   | 4     | 5   | 2.5   | 5.5 | 3     | 4   | 2     | 4.5 | 3      | 2.5 | 2   |   |
| # Animal :      | 3             |     |       |   |       |     |       |     |       |     |       |     |       |     |        |     |     |   |
|                 |               |     |       |   |       |     |       |     |       |     |       |     |       |     |        |     |     |   |
| Diameter Score  | measured      | L   | R     | L | R     | L   | R     | L   | R     | L   | R     | L   | R     | L   | R      | L   | R   |   |
| Elevation Score | first scorer  | 2   | 2     | 2 | 2     | 2   | 2     | 2   | 2     | 2   | 3     | 2   | 2     | 1   | 2      | 1   | 2   | 2 |
|                 | second scorer | 1   | 2     | 1 | 2     | 1   | 2     | 1   | 2     | 0   | 1     | 1   | 1     | 1   | 1      | 1   | 1   | 1 |
| Escar Score     | first scorer  | 1   | 2     | 1 | 2     | 1   | 2     | 1   | 2     | 0   | 2     | 1   | 2     | 2   | 2      | 0   | 2   | 2 |
|                 | second scorer | 0   | 0     | 0 | 0     | 0   | 0     | 0   | 0     | 1   | 0     | 0   | 0     | 0   | 0      | 0   | 0   | 0 |
| Total Score     | averaged      | 3   | 4     | 3 | 4     | 3   | 4     | 3   | 4     | 3   | 4.5   | 3   | 3.5   | 2.5 | 3.5    | 1.5 | 3.5 |   |
| # Animal :      | 4             |     |       |   |       |     |       |     |       |     |       |     |       |     |        |     |     |   |
|                 |               |     |       |   |       |     |       |     |       |     |       |     |       |     |        |     |     |   |
| Diameter Score  | measured      | L   | R     | L | R     | L   | R     | L   | R     | L   | R     | L   | R     | L   | R      | L   | R   |   |
| Elevation Score | first scorer  | 2   | 2     | 2 | 2     | 2   | 2     | 2   | 2     | 2   | 2     | 2   | 2     | 2   | 2      | 1   | 1   | 1 |
|                 | second scorer | 2   | 2     | 1 | 1     | 1   | 1     | 1   | 1     | 1   | 1     | 1   | 1     | 0   | 1      | 0   | 0   | 0 |
| Escar Score     | first scorer  | 2   | 1     | 1 | 1     | 1   | 1     | 1   | 1     | 1   | 1     | 1   | 1     | 1   | 0      | 1   | 1   | 1 |
|                 | second scorer | 0   | 0     | 0 | 0     | 0   | 0     | 0   | 0     | 0   | 0     | 0   | 0     | 0   | 0      | 0   | 0   | 0 |
| Total Score     | averaged      | 4   | 3.5   | 3 | 3     | 3   | 3     | 3   | 3     | 3   | 3     | 3   | 3     | 2.5 | 2.5    | 1.5 | 1.5 |   |
| # Animal :      | 5             |     |       |   |       |     |       |     |       |     |       |     |       |     |        |     |     |   |
|                 |               |     |       |   |       |     |       |     |       |     |       |     |       |     |        |     |     |   |
| Diameter Score  | measured      | L   | R     | L | R     | L   | R     | L   | R     | L   | R     | L   | R     | L   | R      | L   | R   |   |
| Elevation Score | first scorer  | 2   | 2     | 2 | 2     | 1   | 1     | 1   | 1     | 2   | 2     | 2   | 2     | 2   | 2      | 2   | 2   | 2 |
|                 | second scorer | 1   | 1     | 1 | 1     | 2   | 2     | 2   | 2     | 1   | 2     | 1   | 1     | 2   | 2      | 1   | 1   | 1 |
| Escar Score     | first scorer  | 2   | 1     | 1 | 1     | 1   | 1     | 2   | 2     | 2   | 1     | 2   | 2     | 1   | 1      | 1   | 2   | 2 |
|                 | second scorer | 0   | 0     | 0 | 0     | 0   | 0     | 0   | 0     | 0   | 0     | 0   | 0     | 0   | 0      | 0   | 0   | 0 |
| Total Score     | averaged      | 3.5 | 3     | 3 | 3.5   | 2   | 2.5   | 3   | 3     | 3.5 | 3.5   | 3.5 | 3.5   | 3.5 | 3.5    | 3   | 3.5 |   |

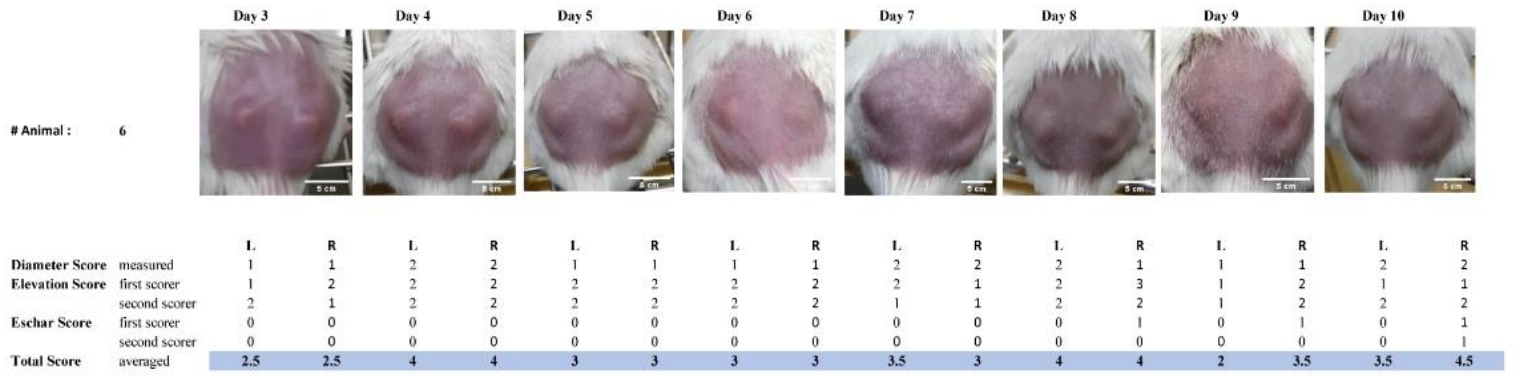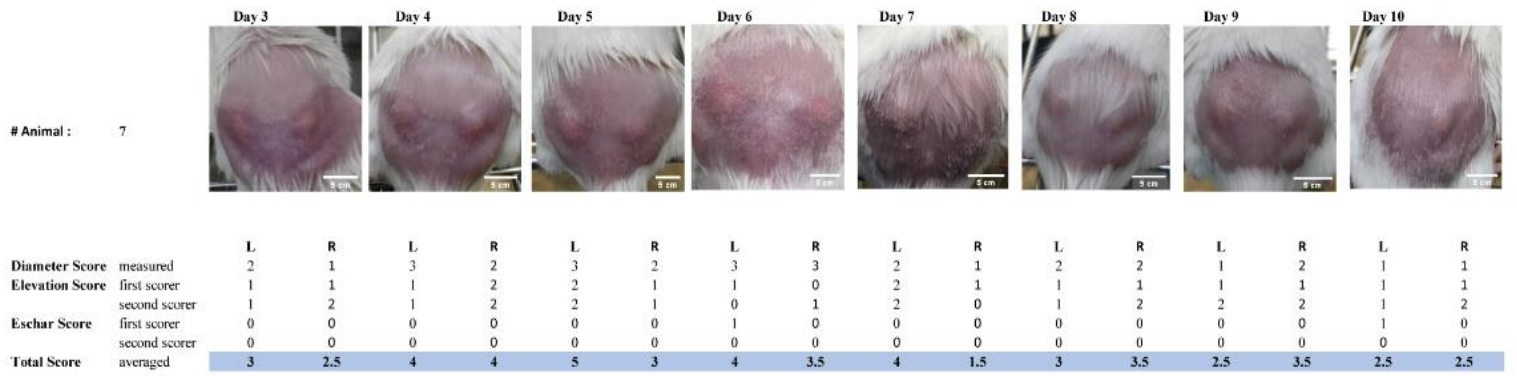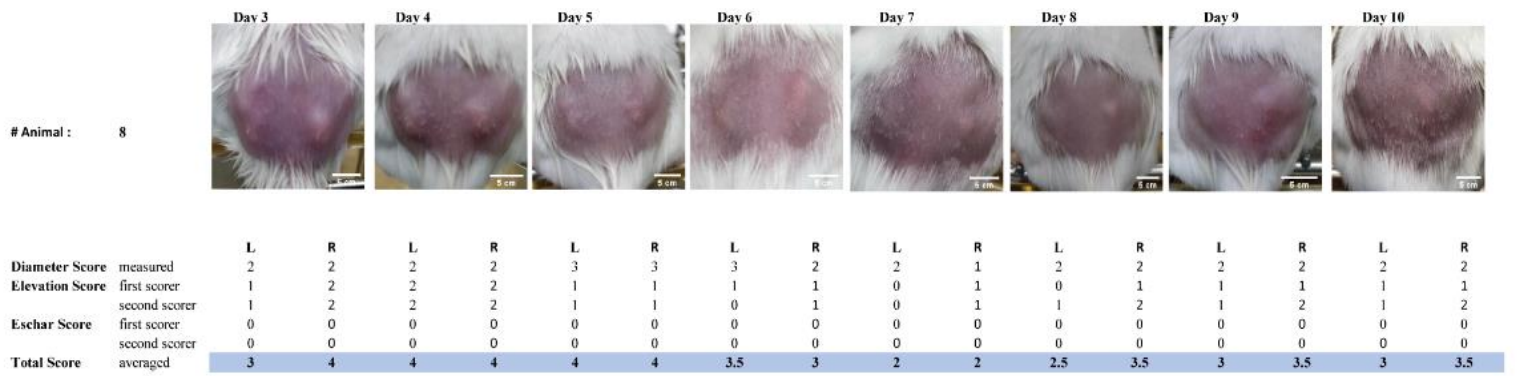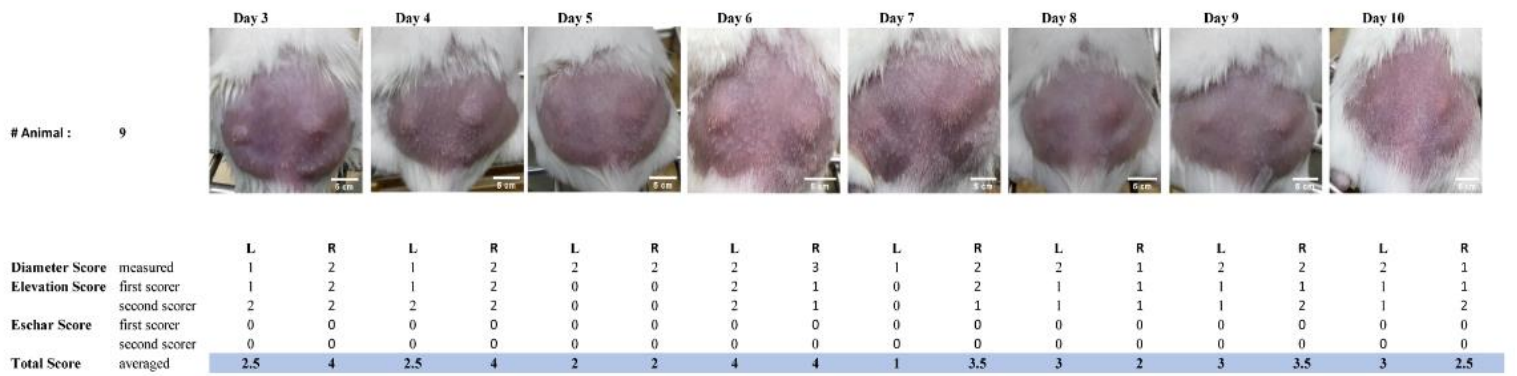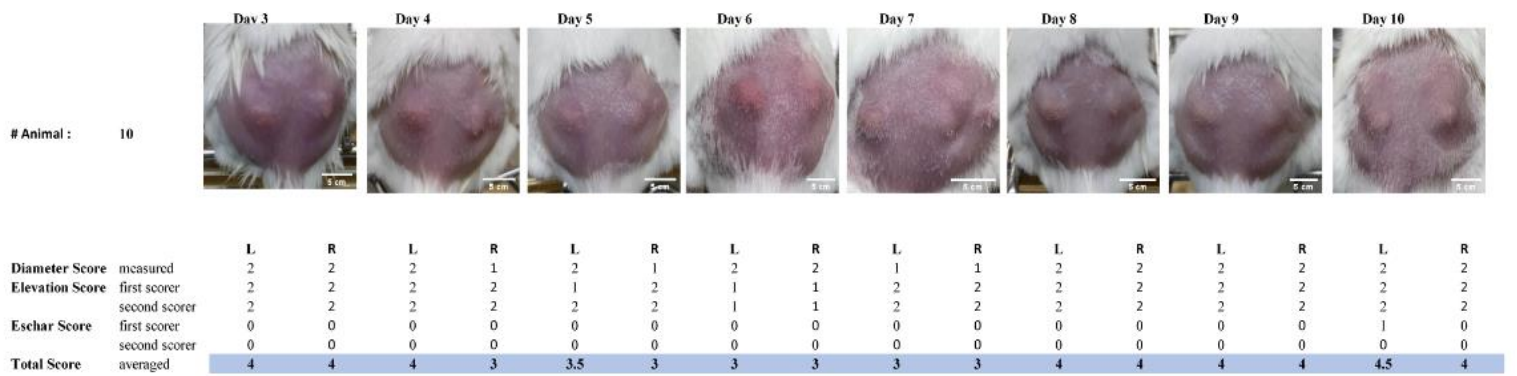

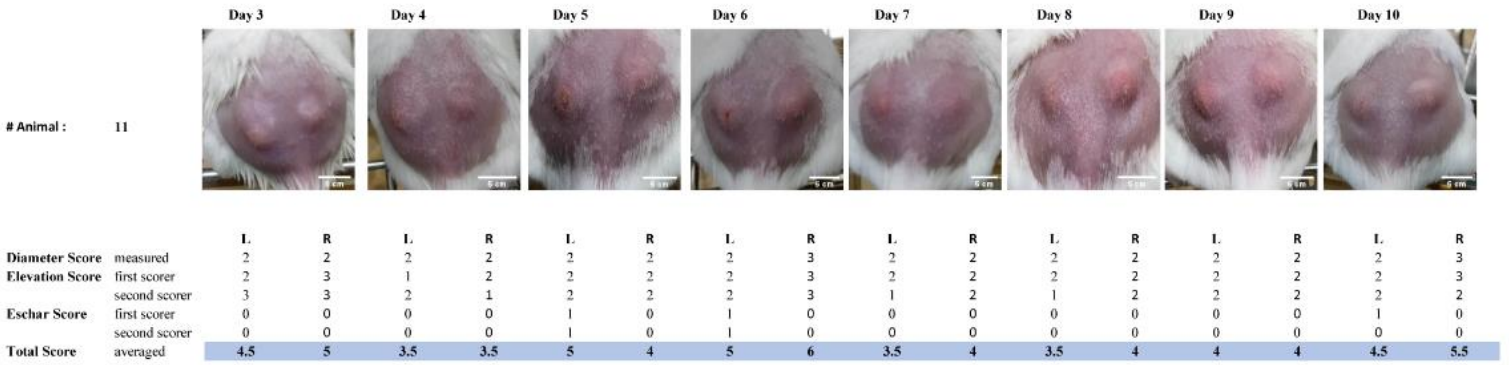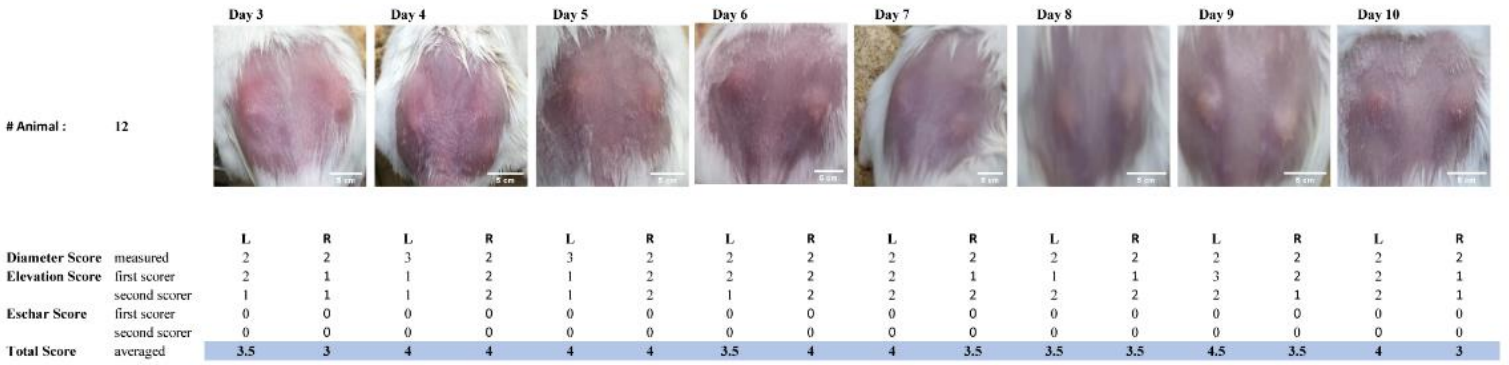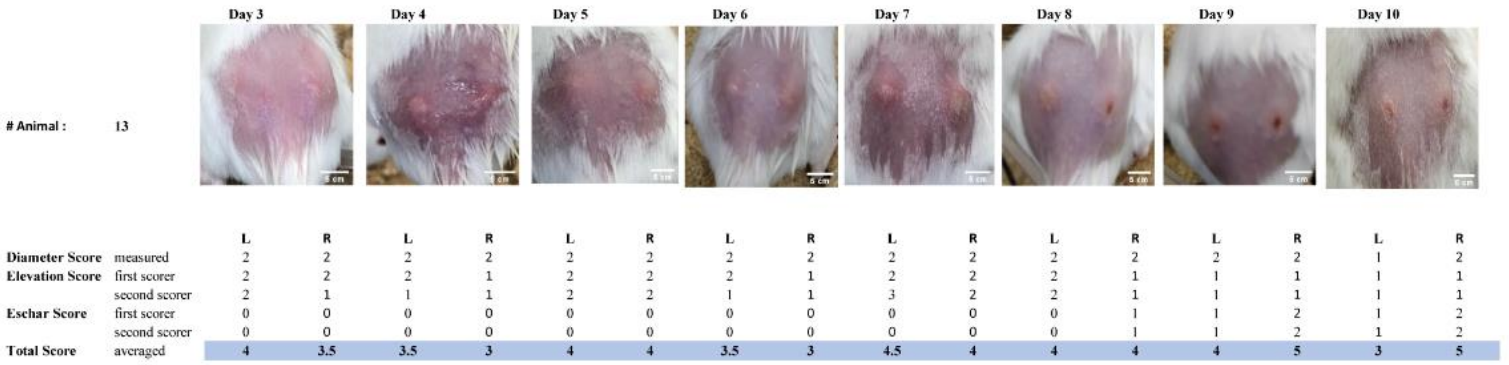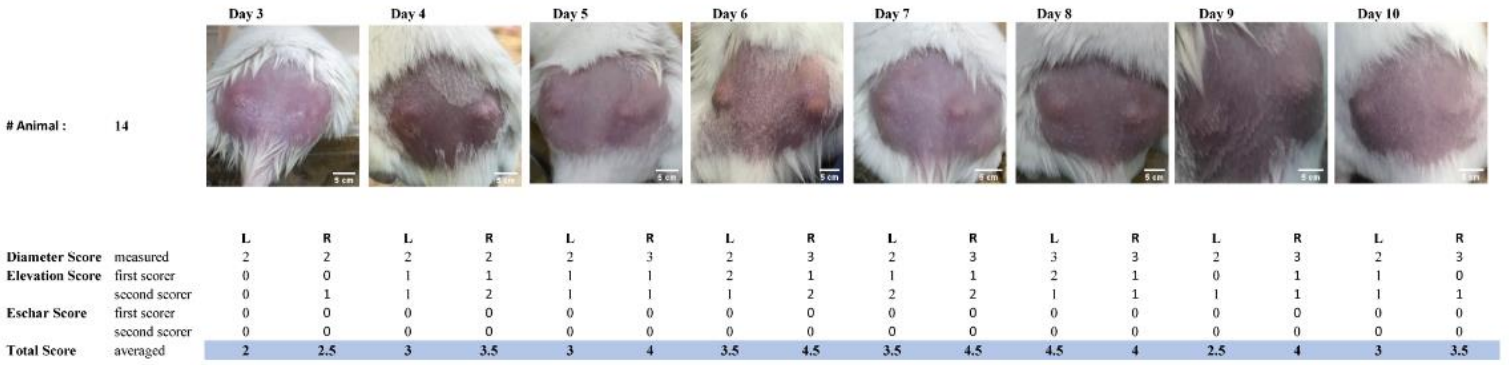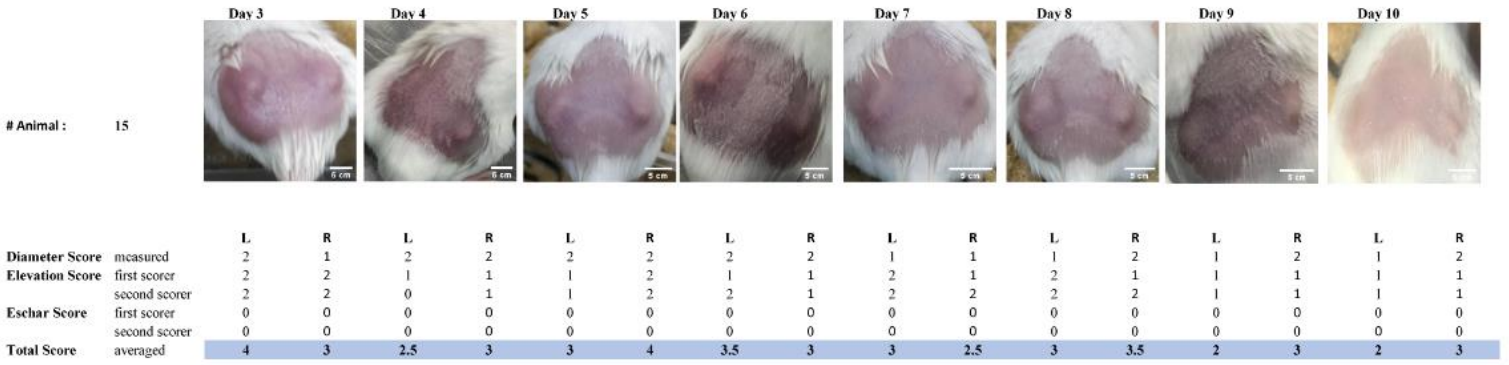

|                 |               | Day 3 |   | Day 4 |   | Day 5 |     | Day 6 |     | Day 7 |   | Day 8 |   | Day 9 |     | Day 10 |     |
|-----------------|---------------|-------|---|-------|---|-------|-----|-------|-----|-------|---|-------|---|-------|-----|--------|-----|
| # Animal :      | 16            |       |   |       |   |       |     |       |     |       |   |       |   |       |     |        |     |
| Diameter Score  | measured      | L     | R | L     | R | L     | R   | L     | R   | L     | R | L     | R | L     | R   | L      | R   |
| Elevation Score | first scorer  | 2     | 2 | 2     | 1 | 2     | 2   | 2     | 2   | 2     | 1 | 2     | 2 | 2     | 2   | 1      | 2   |
|                 | second scorer | 1     | 2 | 1     | 1 | 1     | 2   | 1     | 2   | 1     | 1 | 1     | 1 | 1     | 1   | 1      | 1   |
| Eschar Score    | first scorer  | 2     | 2 | 1     | 1 | 1     | 1   | 2     | 1   | 1     | 1 | 1     | 1 | 2     | 2   | 0      | 1   |
|                 | second scorer | 0     | 0 | 0     | 0 | 0     | 0   | 0     | 0   | 0     | 0 | 0     | 0 | 0     | 0   | 1      | 2   |
| Total Score     | averaged      | 3.5   | 4 | 3     | 2 | 3     | 3.5 | 3.5   | 3.5 | 3     | 3 | 2     | 3 | 3.5   | 3.5 | 2.5    | 4.5 |

|                 |               | Day 3 |   | Day 4 |     | Day 5 |     | Day 6 |   | Day 7 |     | Day 8 |     | Day 9 |   | Day 10 |   |
|-----------------|---------------|-------|---|-------|-----|-------|-----|-------|---|-------|-----|-------|-----|-------|---|--------|---|
| # Animal :      | 17            |       |   |       |     |       |     |       |   |       |     |       |     |       |   |        |   |
| Diameter Score  | measured      | L     | R | L     | R   | L     | R   | L     | R | L     | R   | L     | R   | L     | R | L      | R |
| Elevation Score | first scorer  | 2     | 1 | 3     | 2   | 2     | 2   | 2     | 3 | 2     | 2   | 2     | 3   | 1     | 2 | 2      | 2 |
|                 | second scorer | 1     | 1 | 1     | 0   | 1     | 1   | 1     | 1 | 2     | 2   | 2     | 2   | 1     | 2 | 1      | 2 |
| Eschar Score    | first scorer  | 1     | 2 | 2     | 1   | 2     | 2   | 1     | 1 | 1     | 1   | 1     | 1   | 2     | 2 | 2      | 2 |
|                 | second scorer | 0     | 1 | 1     | 0   | 0     | 0   | 0     | 0 | 0     | 0   | 0     | 0   | 0     | 0 | 0      | 0 |
| Total Score     | averaged      | 3     | 3 | 5     | 2.5 | 3.5   | 3.5 | 3     | 4 | 3.5   | 3.5 | 3.5   | 4.5 | 2.5   | 4 | 3.5    | 4 |

## FD3 phage-treated group

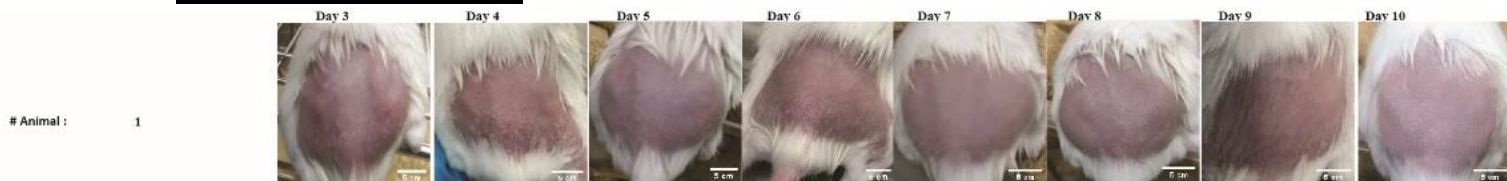

|                 |               | L   | R   | L   | R | L | R | L   | R   | L   | R | L | R | L | R |
|-----------------|---------------|-----|-----|-----|---|---|---|-----|-----|-----|---|---|---|---|---|
| Diameter Score  | measured      | 1   | 2   | 2   | 1 | 2 | 2 | 1   | 1   | 1   | 0 | 1 | 0 | 1 | 0 |
| Elevation Score | first scorer  | 1   | 1   | 2   | 0 | 1 | 0 | 1   | 1   | 0   | 0 | 1 | 1 | 0 | 1 |
|                 | second scorer | 2   | 2   | 1   | 0 | 1 | 0 | 0   | 0   | 1   | 0 | 1 | 1 | 0 | 1 |
| Eschar Score    | first scorer  | 0   | 0   | 0   | 0 | 0 | 0 | 0   | 0   | 0   | 0 | 0 | 0 | 0 | 0 |
|                 | second scorer | 0   | 0   | 0   | 0 | 0 | 0 | 0   | 0   | 0   | 0 | 0 | 0 | 0 | 0 |
| Total Score     | averaged      | 2.5 | 3.5 | 3.5 | 1 | 3 | 2 | 1.5 | 1.5 | 1.5 | 0 | 2 | 1 | 2 | 0 |

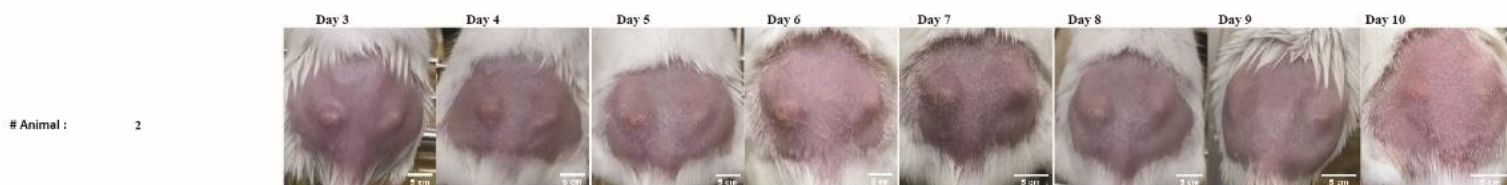

|                 |               | L | R | L | R   | L | R   | L   | R   | L   | R   | L | R   | L | R   |
|-----------------|---------------|---|---|---|-----|---|-----|-----|-----|-----|-----|---|-----|---|-----|
| Diameter Score  | measured      | 3 | 1 | 2 | 1   | 2 | 1   | 2   | 1   | 2   | 1   | 2 | 1   | 1 | 1   |
| Elevation Score | first scorer  | 2 | 2 | 2 | 1   | 2 | 2   | 2   | 1   | 2   | 1   | 2 | 1   | 2 | 1   |
|                 | second scorer | 2 | 2 | 2 | 2   | 2 | 1   | 2   | 2   | 2   | 2   | 2 | 1   | 1 | 1   |
| Eschar Score    | first scorer  | 0 | 0 | 0 | 0   | 0 | 0   | 1   | 0   | 1   | 0   | 0 | 0   | 0 | 0   |
|                 | second scorer | 0 | 0 | 0 | 0   | 0 | 0   | 0   | 0   | 0   | 0   | 0 | 0   | 0 | 0   |
| Total Score     | averaged      | 5 | 3 | 4 | 2.5 | 4 | 2.5 | 4.5 | 2.5 | 4.5 | 2.5 | 4 | 2.5 | 2 | 2.5 |

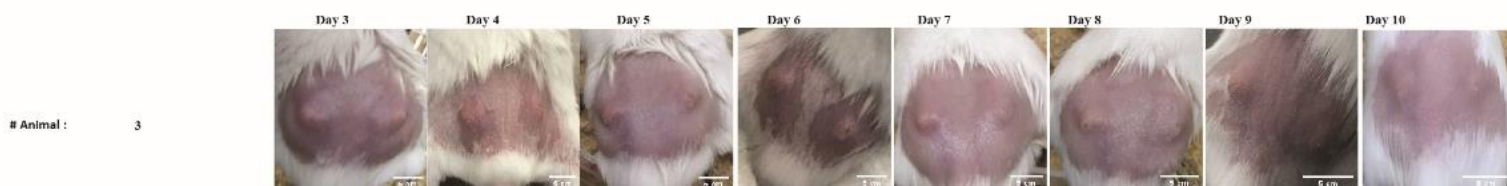

|                 |               | L | R | L   | R | L | R   | L   | R   | L | R   | L   | R   | L | R   |
|-----------------|---------------|---|---|-----|---|---|-----|-----|-----|---|-----|-----|-----|---|-----|
| Diameter Score  | measured      | 3 | 2 | 2   | 1 | 2 | 1   | 1   | 1   | 1 | 1   | 1   | 1   | 1 | 0   |
| Elevation Score | first scorer  | 2 | 2 | 1   | 1 | 1 | 1   | 1   | 0   | 1 | 1   | 1   | 1   | 1 | 0   |
|                 | second scorer | 2 | 2 | 0   | 1 | 1 | 0   | 1   | 1   | 1 | 1   | 1   | 0   | 1 | 1   |
| Eschar Score    | first scorer  | 0 | 0 | 0   | 0 | 0 | 0   | 0   | 0   | 0 | 0   | 0   | 0   | 0 | 0   |
|                 | second scorer | 0 | 0 | 0   | 0 | 0 | 0   | 1   | 0   | 0 | 1   | 0   | 0   | 0 | 0   |
| Total Score     | averaged      | 5 | 4 | 2.5 | 2 | 3 | 1.5 | 1.5 | 2.5 | 2 | 1.5 | 2.5 | 2.5 | 2 | 1.5 |

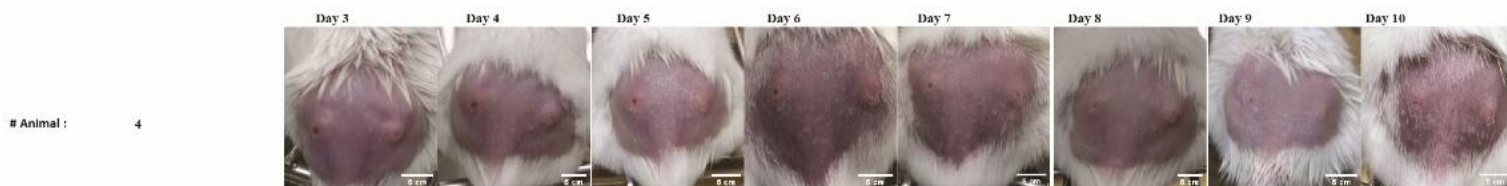

|                 |               | L | R | L | R | L | R | L | R | L | R   | L   | R   | L   | R |
|-----------------|---------------|---|---|---|---|---|---|---|---|---|-----|-----|-----|-----|---|
| Diameter Score  | measured      | 2 | 2 | 2 | 2 | 1 | 2 | 1 | 2 | 1 | 2   | 2   | 1   | 1   | 1 |
| Elevation Score | first scorer  | 1 | 1 | 0 | 2 | 1 | 1 | 1 | 1 | 2 | 1   | 1   | 1   | 1   | 1 |
|                 | second scorer | 2 | 1 | 1 | 2 | 0 | 1 | 1 | 1 | 1 | 2   | 1   | 1   | 0   | 1 |
| Eschar Score    | first scorer  | 2 | 1 | 1 | 0 | 1 | 0 | 1 | 0 | 1 | 0   | 2   | 0   | 0   | 1 |
|                 | second scorer | 1 | 1 | 2 | 0 | 2 | 0 | 1 | 0 | 2 | 1   | 1   | 1   | 0   | 0 |
| Total Score     | averaged      | 5 | 4 | 4 | 4 | 3 | 3 | 3 | 3 | 4 | 2.5 | 4.5 | 4.5 | 2.5 | 2 |

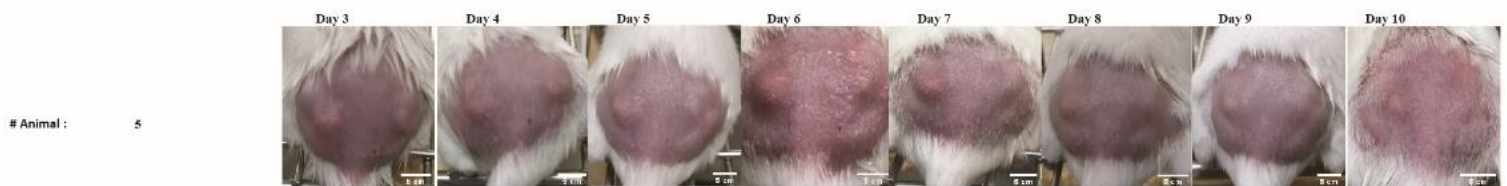

|                 |               | L | R | L   | R | L | R | L   | R   | L | R   | L | R   | L | R |
|-----------------|---------------|---|---|-----|---|---|---|-----|-----|---|-----|---|-----|---|---|
| Diameter Score  | measured      | 2 | 1 | 2   | 1 | 2 | 2 | 2   | 1   | 2 | 2   | 2 | 2   | 1 | 2 |
| Elevation Score | first scorer  | 2 | 2 | 2   | 1 | 2 | 1 | 2   | 1   | 2 | 2   | 2 | 1   | 1 | 1 |
|                 | second scorer | 2 | 2 | 1   | 1 | 2 | 1 | 1   | 0   | 2 | 2   | 2 | 1   | 1 | 0 |
| Eschar Score    | first scorer  | 0 | 0 | 0   | 0 | 0 | 0 | 0   | 0   | 0 | 0   | 0 | 0   | 0 | 0 |
|                 | second scorer | 0 | 0 | 0   | 0 | 0 | 0 | 0   | 0   | 0 | 0   | 0 | 0   | 0 | 0 |
| Total Score     | averaged      | 4 | 3 | 3.5 | 2 | 4 | 3 | 3.5 | 1.5 | 4 | 2.5 | 4 | 3.5 | 3 | 2 |

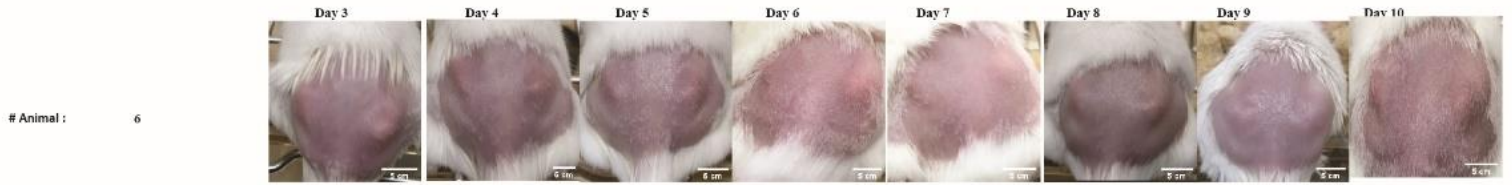

|                 |               | L   | R   | L   | R   | L   | R   | L   | R   | L   | R   | L | R   | L   | R   |
|-----------------|---------------|-----|-----|-----|-----|-----|-----|-----|-----|-----|-----|---|-----|-----|-----|
| Diameter Score  | measured      | 2   | 2   | 2   | 2   | 2   | 3   | 1   | 2   | 1   | 2   | 1 | 2   | 1   | 2   |
| Elevation Score | first scorer  | 2   | 1   | 1   | 2   | 0   | 2   | 1   | 2   | 2   | 2   | 1 | 1   | 0   | 1   |
|                 | second scorer | 1   | 2   | 0   | 1   | 1   | 1   | 0   | 1   | 1   | 1   | 2 | 1   | 2   | 0   |
| Eschar Score    | first scorer  | 0   | 0   | 0   | 0   | 0   | 0   | 0   | 0   | 0   | 0   | 0 | 0   | 0   | 0   |
|                 | second scorer | 0   | 0   | 0   | 0   | 0   | 0   | 0   | 0   | 0   | 0   | 0 | 0   | 0   | 0   |
| Total Score     | averaged      | 3.5 | 3.5 | 2.5 | 3.5 | 2.5 | 4.5 | 1.5 | 3.5 | 2.5 | 3.5 | 2 | 3.5 | 1.5 | 3.5 |

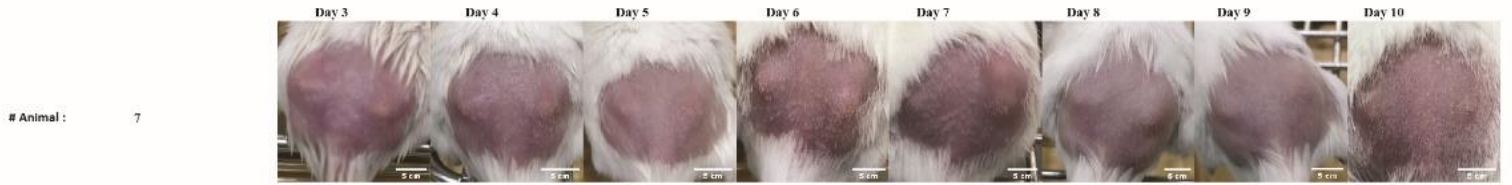

|                 |               | L   | R   | L   | R   | L | R   | L   | R   | L | R | L | R   | L | R |
|-----------------|---------------|-----|-----|-----|-----|---|-----|-----|-----|---|---|---|-----|---|---|
| Diameter Score  | measured      | 2   | 1   | 2   | 1   | 2 | 1   | 1   | 1   | 1 | 1 | 2 | 1   | 2 | 1 |
| Elevation Score | first scorer  | 2   | 2   | 0   | 2   | 1 | 2   | 0   | 1   | 1 | 1 | 1 | 1   | 0 | 1 |
|                 | second scorer | 1   | 1   | 1   | 1   | 1 | 1   | 1   | 2   | 1 | 1 | 2 | 1   | 0 | 1 |
| Eschar Score    | first scorer  | 0   | 0   | 0   | 0   | 0 | 0   | 0   | 0   | 0 | 0 | 0 | 0   | 0 | 0 |
|                 | second scorer | 0   | 0   | 0   | 0   | 0 | 0   | 0   | 0   | 0 | 0 | 0 | 0   | 0 | 0 |
| Total Score     | averaged      | 3.5 | 2.5 | 2.5 | 2.5 | 3 | 2.5 | 1.5 | 2.5 | 2 | 2 | 2 | 3.5 | 2 | 2 |

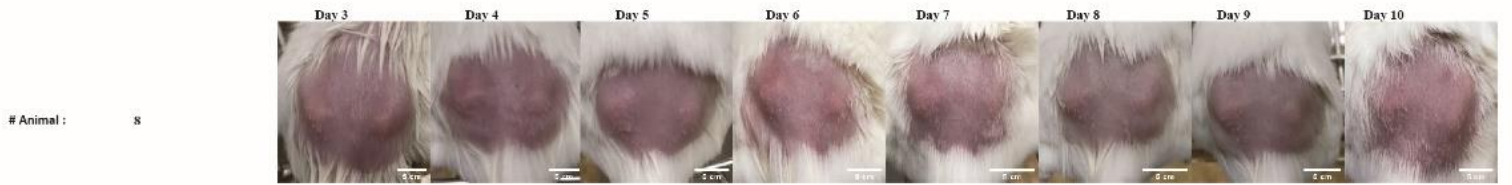

|                 |               | L | R | L   | R | L   | R | L | R   | L | R   | L | R   | L   | R |
|-----------------|---------------|---|---|-----|---|-----|---|---|-----|---|-----|---|-----|-----|---|
| Diameter Score  | measured      | 1 | 2 | 2   | 2 | 2   | 2 | 2 | 2   | 1 | 1   | 1 | 2   | 1   | 1 |
| Elevation Score | first scorer  | 1 | 2 | 2   | 1 | 2   | 1 | 1 | 2   | 1 | 1   | 1 | 1   | 1   | 1 |
|                 | second scorer | 1 | 2 | 1   | 1 | 1   | 1 | 1 | 1   | 0 | 1   | 2 | 0   | 1   | 2 |
| Eschar Score    | first scorer  | 0 | 0 | 0   | 0 | 0   | 0 | 0 | 0   | 0 | 0   | 0 | 0   | 0   | 0 |
|                 | second scorer | 0 | 0 | 0   | 0 | 0   | 0 | 0 | 0   | 0 | 0   | 0 | 0   | 0   | 0 |
| Total Score     | averaged      | 2 | 4 | 3.5 | 3 | 3.5 | 3 | 3 | 3.5 | 2 | 1.5 | 2 | 3.5 | 1.5 | 2 |

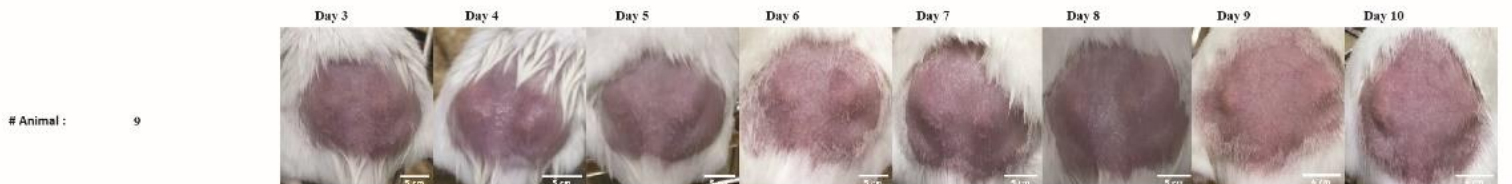

|                 |               | L   | R   | L | R   | L | R   | L   | R   | L   | R   | L   | R | L | R |
|-----------------|---------------|-----|-----|---|-----|---|-----|-----|-----|-----|-----|-----|---|---|---|
| Diameter Score  | measured      | 1   | 2   | 2 | 2   | 1 | 3   | 1   | 2   | 1   | 1   | 1   | 2 | 1 | 2 |
| Elevation Score | first scorer  | 2   | 2   | 0 | 2   | 1 | 2   | 1   | 1   | 1   | 1   | 1   | 1 | 1 | 1 |
|                 | second scorer | 1   | 1   | 0 | 1   | 1 | 1   | 2   | 2   | 2   | 1   | 0   | 1 | 1 | 1 |
| Eschar Score    | first scorer  | 0   | 0   | 0 | 0   | 0 | 0   | 0   | 0   | 0   | 0   | 0   | 0 | 0 | 0 |
|                 | second scorer | 0   | 0   | 0 | 0   | 0 | 0   | 0   | 0   | 0   | 0   | 0   | 0 | 0 | 0 |
| Total Score     | averaged      | 2.5 | 3.5 | 2 | 3.5 | 2 | 4.5 | 2.5 | 3.5 | 2.5 | 1.5 | 1.5 | 3 | 2 | 3 |

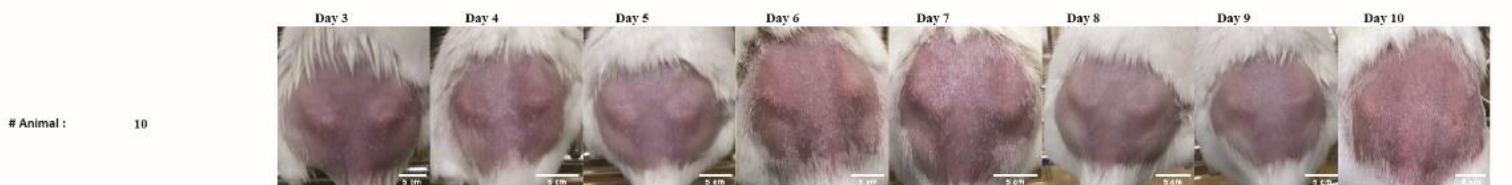

|                 |               | L | R | L | R | L | R | L | R | L | R   | L   | R | L | R |
|-----------------|---------------|---|---|---|---|---|---|---|---|---|-----|-----|---|---|---|
| Diameter Score  | measured      | 2 | 3 | 1 | 2 | 2 | 2 | 1 | 2 | 2 | 2   | 1   | 2 | 1 | 2 |
| Elevation Score | first scorer  | 2 | 1 | 2 | 2 | 1 | 1 | 1 | 1 | 1 | 1   | 1   | 1 | 1 | 1 |
|                 | second scorer | 2 | 1 | 2 | 2 | 1 | 1 | 1 | 1 | 0 | 1   | 1   | 1 | 1 | 1 |
| Eschar Score    | first scorer  | 0 | 0 | 0 | 0 | 0 | 0 | 0 | 0 | 0 | 0   | 0   | 0 | 0 | 0 |
|                 | second scorer | 0 | 0 | 0 | 0 | 0 | 0 | 0 | 0 | 0 | 0   | 0   | 0 | 0 | 0 |
| Total Score     | averaged      | 4 | 4 | 3 | 4 | 3 | 3 | 2 | 3 | 3 | 2.5 | 3.2 | 2 | 3 | 2 |

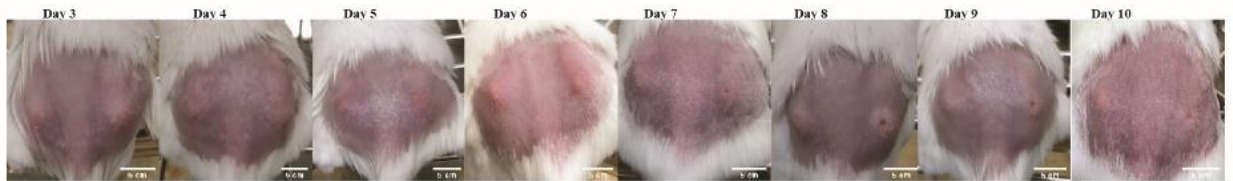

# Animal : 11

|                 |               | L   | R   | L   | R   | L | R | L | R   | L   | R | L | R | L   | R   | L | R   |
|-----------------|---------------|-----|-----|-----|-----|---|---|---|-----|-----|---|---|---|-----|-----|---|-----|
| Diameter Score  | measured      | 2   | 2   | 2   | 2   | 2 | 2 | 1 | 1   | 1   | 0 | 2 | 1 | 1   | 1   | 1 | 0   |
| Elevation Score | first scorer  | 1   | 0   | 1   | 0   | 0 | 1 | 1 | 0   | 0   | 1 | 1 | 1 | 0   | 1   | 1 | 0   |
|                 | second scorer | 2   | 1   | 0   | 1   | 1 | 1 | 1 | 1   | 1   | 1 | 1 | 1 | 1   | 1   | 1 | 0   |
| Eschar Score    | first scorer  | 0   | 0   | 0   | 0   | 0 | 0 | 0 | 0   | 0   | 0 | 0 | 1 | 0   | 0   | 0 | 0   |
|                 | second scorer | 0   | 0   | 0   | 0   | 1 | 0 | 0 | 0   | 1   | 0 | 1 | 0 | 1   | 0   | 1 | 0   |
| Total Score     | averaged      | 3.5 | 2.5 | 2.5 | 2.5 | 3 | 3 | 2 | 1.5 | 1.5 | 1 | 3 | 3 | 1.5 | 2.5 | 2 | 0.5 |

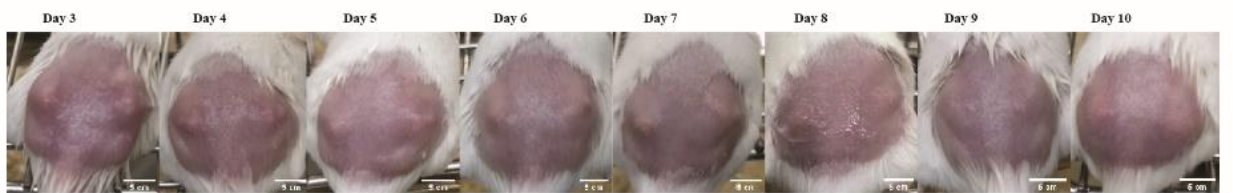

# Animal : 12

|                 |               | L   | R   | L | R | L | R | L   | R   | L | R   | L | R | L   | R   | L | R |
|-----------------|---------------|-----|-----|---|---|---|---|-----|-----|---|-----|---|---|-----|-----|---|---|
| Diameter Score  | measured      | 3   | 7   | 2 | 7 | 3 | 2 | 2   | 1   | 2 | 1   | 2 | 1 | 1   | 0   | 1 | 1 |
| Elevation Score | first scorer  | 2   | 2   | 2 | 1 | 2 | 1 | 1   | 2   | 2 | 2   | 2 | 1 | 2   | 1   | 1 | 1 |
|                 | second scorer | 3   | 3   | 2 | 1 | 2 | 1 | 2   | 1   | 2 | 1   | 2 | 1 | 1   | 0   | 1 | 1 |
| Eschar Score    | first scorer  | 0   | 0   | 0 | 0 | 0 | 0 | 0   | 0   | 0 | 0   | 0 | 0 | 0   | 0   | 0 | 0 |
|                 | second scorer | 0   | 0   | 0 | 0 | 0 | 0 | 0   | 0   | 0 | 0   | 0 | 0 | 0   | 0   | 0 | 0 |
| Total Score     | averaged      | 5.5 | 4.5 | 4 | 3 | 5 | 3 | 3.5 | 2.5 | 4 | 2.5 | 4 | 2 | 2.5 | 0.5 | 2 | 2 |

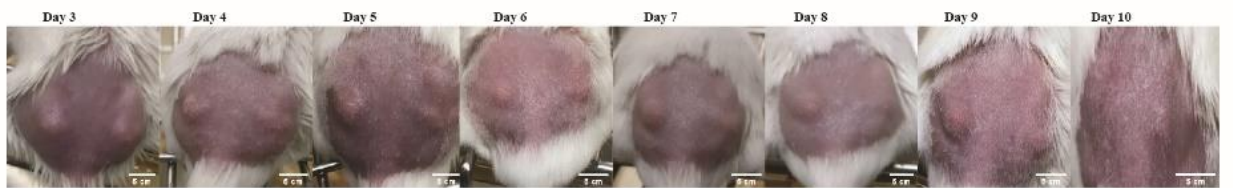

# Animal : 13

|                 |               | L   | R   | L | R | L | R | L | R | L | R | L | R   | L | R   | L   | R   |
|-----------------|---------------|-----|-----|---|---|---|---|---|---|---|---|---|-----|---|-----|-----|-----|
| Diameter Score  | measured      | 2   | 2   | 2 | 2 | 3 | 2 | 2 | 1 | 2 | 1 | 2 | 0   | 2 | 0   | 2   | 0   |
| Elevation Score | first scorer  | 1   | 1   | 1 | 1 | 2 | 1 | 2 | 1 | 2 | 1 | 1 | 1   | 1 | 1   | 1   | 0   |
|                 | second scorer | 2   | 2   | 1 | 1 | 2 | 1 | 2 | 1 | 2 | 1 | 1 | 0   | 1 | 0   | 0   | 1   |
| Eschar Score    | first scorer  | 0   | 0   | 0 | 0 | 0 | 0 | 0 | 0 | 0 | 0 | 0 | 0   | 0 | 0   | 0   | 0   |
|                 | second scorer | 0   | 0   | 0 | 0 | 0 | 0 | 0 | 0 | 0 | 0 | 0 | 0   | 0 | 0   | 0   | 0   |
| Total Score     | averaged      | 3.5 | 3.5 | 3 | 3 | 5 | 3 | 4 | 2 | 4 | 2 | 3 | 0.5 | 3 | 0.5 | 2.5 | 0.5 |

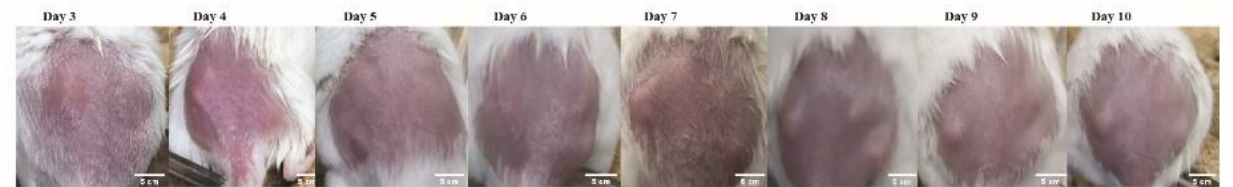

# Animal : 14

|                 |               | L   | R | L | R | L | R | L   | R   | L   | R | L   | R | L | R | L | R   |
|-----------------|---------------|-----|---|---|---|---|---|-----|-----|-----|---|-----|---|---|---|---|-----|
| Diameter Score  | measured      | 1   | 2 | 1 | 2 | 1 | 0 | 1   | 0   | 2   | 1 | 2   | 2 | 2 | 1 | 2 | 1   |
| Elevation Score | first scorer  | 1   | 0 | 1 | 0 | 0 | 0 | 1   | 1   | 2   | 1 | 2   | 1 | 2 | 1 | 2 | 0   |
|                 | second scorer | 0   | 0 | 1 | 0 | 0 | 0 | 0   | 0   | 1   | 1 | 1   | 1 | 2 | 1 | 2 | 1   |
| Eschar Score    | first scorer  | 0   | 0 | 0 | 0 | 0 | 0 | 0   | 0   | 0   | 0 | 0   | 0 | 0 | 0 | 0 | 0   |
|                 | second scorer | 0   | 0 | 0 | 0 | 0 | 0 | 0   | 0   | 0   | 0 | 0   | 0 | 0 | 0 | 0 | 0   |
| Total Score     | averaged      | 1.5 | 2 | 2 | 2 | 1 | 0 | 1.5 | 0.5 | 3.5 | 2 | 3.5 | 3 | 4 | 2 | 4 | 1.5 |

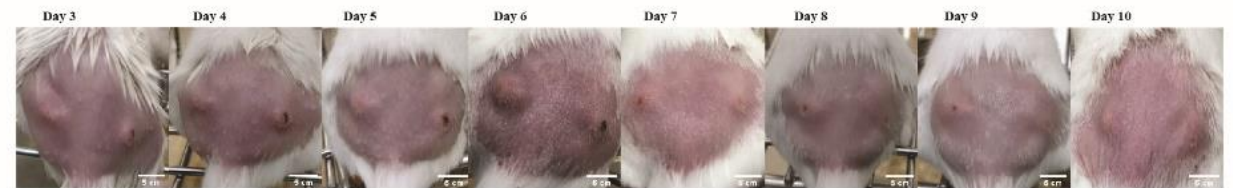

# Animal : 15

|                 |               | L | R   | L | R | L | R | L | R | L   | R   | L   | R | L | R   | L | R   |
|-----------------|---------------|---|-----|---|---|---|---|---|---|-----|-----|-----|---|---|-----|---|-----|
| Diameter Score  | measured      | 2 | 2   | 2 | 2 | 3 | 1 | 2 | 1 | 2   | 1   | 2   | 2 | 2 | 1   | 2 | 1   |
| Elevation Score | first scorer  | 2 | 1   | 2 | 2 | 2 | 1 | 2 | 1 | 1   | 1   | 1   | 1 | 1 | 0   | 1 | 0   |
|                 | second scorer | 2 | 1   | 2 | 2 | 2 | 1 | 2 | 1 | 1   | 1   | 1   | 1 | 1 | 1   | 1 | 1   |
| Eschar Score    | first scorer  | 0 | 1   | 0 | 2 | 0 | 2 | 0 | 2 | 1   | 1   | 1   | 0 | 1 | 0   | 0 | 0   |
|                 | second scorer | 0 | 2   | 0 | 2 | 0 | 2 | 0 | 2 | 2   | 0   | 2   | 0 | 1 | 0   | 0 | 0   |
| Total Score     | averaged      | 4 | 4.5 | 4 | 6 | 5 | 4 | 4 | 4 | 4.5 | 2.5 | 4.5 | 3 | 4 | 1.5 | 3 | 1.5 |

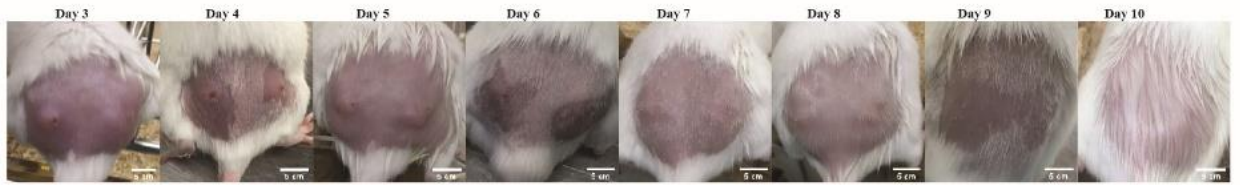

# Animal : 16

|                 |               | Day 3 | Day 4 | Day 5 | Day 6 | Day 7 | Day 8 | Day 9 | Day 10 |
|-----------------|---------------|-------|-------|-------|-------|-------|-------|-------|--------|
|                 |               | L     | R     | L     | R     | L     | R     | L     | R      |
| Diameter Score  | measured      | 3     | 2     | 2     | 1     | 2     | 1     | 0     | 0      |
| Elevation Score | first scorer  | 1     | 1     | 1     | 1     | 1     | 0     | 0     | 0      |
|                 | second scorer | 1     | 1     | 0     | 1     | 1     | 1     | 0     | 0      |
| Eschar Score    | first scorer  | 2     | 0     | 2     | 1     | 1     | 1     | 0     | 0      |
|                 | second scorer | 2     | 0     | 2     | 2     | 1     | 0     | 1     | 0      |
| Total Score     | averaged      | 6     | 3     | 4.5   | 3.5   | 4     | 2.5   | 1     | 0      |

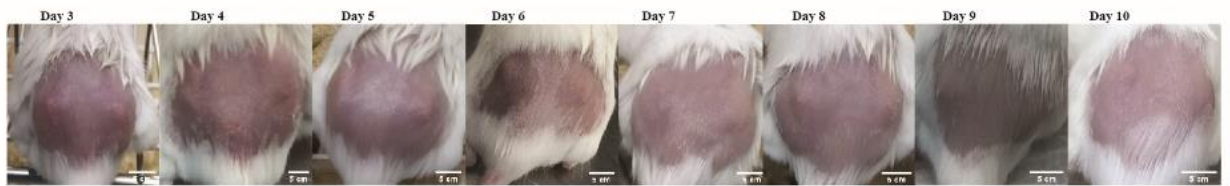

# Animal : 17

|                 |               | Day 3 | Day 4 | Day 5 | Day 6 | Day 7 | Day 8 | Day 9 | Day 10 |
|-----------------|---------------|-------|-------|-------|-------|-------|-------|-------|--------|
|                 |               | L     | R     | L     | R     | L     | R     | L     | R      |
| Diameter Score  | measured      | 2     | 2     | 2     | 2     | 2     | 1     | 2     | 1      |
| Elevation Score | first scorer  | 2     | 2     | 2     | 1     | 1     | 1     | 1     | 2      |
|                 | second scorer | 2     | 2     | 1     | 1     | 1     | 1     | 1     | 1      |
| Eschar Score    | first scorer  | 0     | 0     | 0     | 0     | 0     | 0     | 0     | 0      |
|                 | second scorer | 0     | 0     | 0     | 0     | 0     | 0     | 0     | 0      |
| Total Score     | averaged      | 4     | 4     | 3.5   | 3     | 3     | 3     | 2     | 3      |



**Table S5.**

List of antibodies used in this study. Their name, dilution used in this manuscript, validation reference, company name, catalog, and clone number are described.

**Table S5.**

| Name              | Dilution | Validation                          | Company name                          | Catalog number | Clone number |
|-------------------|----------|-------------------------------------|---------------------------------------|----------------|--------------|
| CD115             | 1:100    | Hong <i>et al.</i> <sup>4</sup>     | BioLegend (San Diego, CA)             | 135509         | AFS98        |
| CD45              | 1:100    | Davies <i>et al.</i> <sup>5</sup>   | BioLegend (San Diego, CA)             | 103101         | 30-f11       |
| CD64              | 1:100    | Fujiyama <i>et al.</i> <sup>6</sup> | BioLegend (San Diego, CA)             | 139303         | X54-5/7.1    |
| CD11b             | 1:100    | Davies <i>et al.</i> <sup>5</sup>   | BioLegend (San Diego, CA)             | 101201         | M1/70        |
| LY6C              | 1:100    | Hoving <i>et al.</i> <sup>7</sup>   | BioLegend (San Diego, CA)             | 128015         | HK1.4        |
| LY6G              | 1:100    | Davies <i>et al.</i> <sup>5</sup>   | BioLegend (San Diego, CA)             | 127607         | IA8          |
| Zombie UV™        | 1:100    | Fujiyama <i>et al.</i> <sup>6</sup> | BioLegend (San Diego, CA)             | 423107         | n/a          |
| LY6G              | 1:100    | Koren <i>et al.</i> <sup>8</sup>    | BD Biosciences, Franklin<br>Lakes, NJ | 394206         | IA8          |
| Goat anti-rat igG | 1:200    | Koren <i>et al.</i> <sup>8</sup>    | Invitrogen, Waltham, MA               | 11006          | n/a          |

**Table S6.**

List of primers used in this study. The name of the gene, the Forward and reverse sequence, reference of their source are described.

**Table S6.**

| Gene      | Forward                       | Reverse                          | Source                              |
|-----------|-------------------------------|----------------------------------|-------------------------------------|
| 18S       | CGG CTA CCA CAT CCA AGG AA    | GGG CCT CGA AAG AGT CCT<br>GTA T | Koren <i>et al.</i> <sup>8</sup>    |
| CXCL2     | TGA ACA AAG GCA AGG CTA ACT   | CAG GTA CGA TCC AGG CTT CC       | Koren <i>et al.</i> <sup>8</sup>    |
| TNF-alpha | CCC AGG GAC CTC TCT CTA ATC A | AGC TGC CCC TCA GCT TGA G        | Nassar <i>et al.</i> <sup>9</sup>   |
| IL1-beta  | CAA CCA ACA AGT GAT ATT       | GAT CCA CAC TCT CCA GCT          | Mizraji <i>et al.</i> <sup>10</sup> |
| IL-6      | AGT TGC CTT CTT GGG ACT G     | CAG AAT TGC CAT TGC ACA A        | Nassar <i>et al.</i> <sup>9</sup>   |
| IL-17     | CAC TTT GCC TCC CAG ATC AC    | ACC AAT CCC AAA AGG TCC TC       | Nassar <i>et al.</i> <sup>9</sup>   |

**Supplementary References**

1. Rohrschneider, M. *et al.* Evaluation of the transwell system for characterization of dissolution behavior of inhalation drugs: effects of membrane and surfactant. *Mol. Pharm.* **12**, 2618–2624 (2015).
2. Boivin, G. *et al.* Durable and controlled depletion of neutrophils in mice. *Nat. Commun.* **11**, 2762 (2020).
3. Niderla-Bielińska, J. *et al.* A comprehensive miRNome analysis of macrophages isolated from db/db mice and selected miRNAs involved in metabolic syndrome-associated cardiac remodeling. *Int. J. Mol. Sci.* **22**, 2197 (2021).
4. Hong, H. *et al.* Interleukin-3 plays dual roles in osteoclastogenesis by promoting the development of osteoclast progenitors but inhibiting the osteoclastogenic process. *Biochem. Biophys. Res. Commun.* **440**, 545–550 (2013).
5. Davies, M. L. *et al.* A systemic macrophage response is required to contain a peripheral poxvirus infection. *PLoS Pathog.* **13**, e1006435 (2017).
6. Fujiyama, S. *et al.* Identification and isolation of splenic tissue-resident macrophage sub-populations by flow cytometry. *Int. Immunol.* **31**, 51–56 (2019).
7. Hoving, L. R. *et al.* Dietary yeast-derived mannan oligosaccharides have immunomodulatory properties but do not improve high fat diet-induced obesity and glucose intolerance. *PLoS One* **13**, e0196165 (2018).
8. Koren, N. *et al.* Maturation of the neonatal oral mucosa involves unique epithelium-microbiota interactions. *Cell Host Microbe* **29**, 197–209 (2021).
9. Nassar, M. *et al.* GAS6 is a key homeostatic immunological regulator of host–commensal interactions in the oral mucosa. *Proc. Natl. Acad. Sci.* **114**, E337–E346 (2017).
10. Mizraji, G., Heyman, O., Van Dyke, T. E. & Wilensky, A. Resolvin D2 restrains Th1 immunity and prevents alveolar bone loss in murine periodontitis. *Front. Immunol.* **9**, 785 (2018).

**Publication licenses for figures:**

Figure 3a

Supplemental Figure S5

## Confirmation of Publication and Licensing Rights

February 2nd, 2023  
Science Suite Inc.

**Subscription:** Student Plan  
**Agreement number:** YA24YQ3L1K  
**Journal name:** Nature Communications

To whom this may concern,

This document is to confirm that Amit Rimon has been granted a license to use the BioRender content, including icons, templates and other original artwork, appearing in the attached completed graphic pursuant to BioRender's [Academic License Terms](#). This license permits BioRender content to be sublicensed for use in journal publications.

All rights and ownership of BioRender content are reserved by BioRender. All completed graphics must be accompanied by the following citation: "Created with BioRender.com".

BioRender content included in the completed graphic is not licensed for any commercial uses beyond publication in a journal. For any commercial use of this figure, users may, if allowed, recreate it in BioRender under an Industry BioRender Plan.

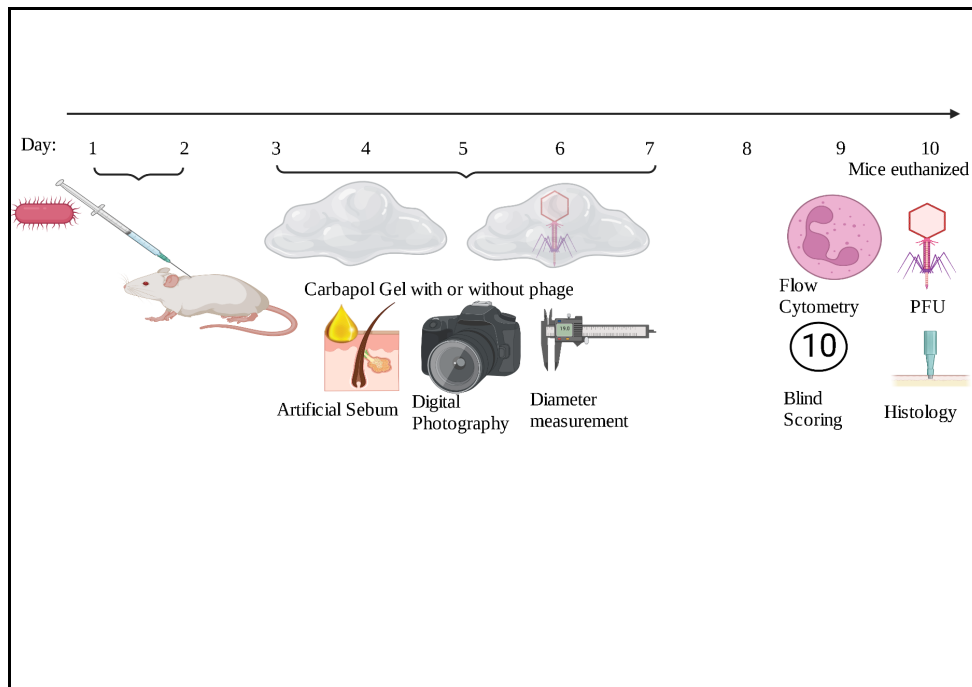

For any questions regarding this document, or other questions about publishing with BioRender refer to our [BioRender Publication Guide](#), or contact BioRender Support at [support@biorender.com](mailto:support@biorender.com).

## Confirmation of Publication and Licensing Rights

February 2nd, 2023  
Science Suite Inc.

**Subscription:** Student Plan  
**Agreement number:** AM24YQ57FP  
**Journal name:** Nature Communications

To whom this may concern,

This document is to confirm that Amit Rimon has been granted a license to use the BioRender content, including icons, templates and other original artwork, appearing in the attached completed graphic pursuant to BioRender's [Academic License Terms](#). This license permits BioRender content to be sublicensed for use in journal publications.

All rights and ownership of BioRender content are reserved by BioRender. All completed graphics must be accompanied by the following citation: "Created with BioRender.com".

BioRender content included in the completed graphic is not licensed for any commercial uses beyond publication in a journal. For any commercial use of this figure, users may, if allowed, recreate it in BioRender under an Industry BioRender Plan.

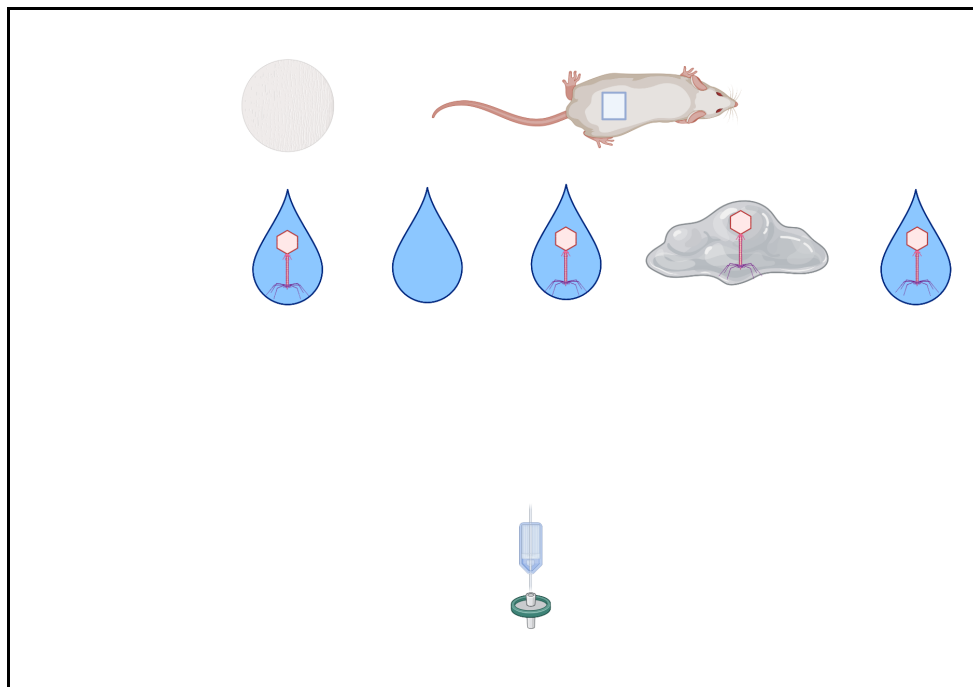

For any questions regarding this document, or other questions about publishing with BioRender refer to our [BioRender Publication Guide](#), or contact BioRender Support at [support@biorender.com](mailto:support@biorender.com).
